# Supplementary material for: Molecular Organisation of Tick-Borne Encephalitis Virus
Source: MDPI journal article supplement (doi:10.3390/v14040792), 2022-04-11

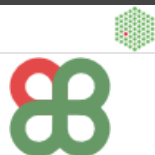

Protein Data

PDBePISA

Bank

[pdbe.org/pisa](http://pdbe.org/pisa)

in Europe

Bringing Structure  
to Biology

[Feedback](#)

[Share](#)

[Services](#)

[Research](#)

[Training](#)

[About us](#)

[www.PDB](#)

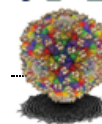

EMDataBank

Unified Data Resource for 3DEM

## PISA Interface.

Session Map (id=179-P6-IE2)

[Start](#) [Interfaces](#) [Interface Search](#)  
[Monomers](#)  
[Assemblies](#)

interface # 29 in ourmodelfortest2.pdb crystal.

Space symmetry group: P 1

interface #29/96

[XML](#) [<<](#) [<](#) [>](#) [>>](#)

### Interface Summary

[XML](#)

View [structure 1](#) [interface](#) [structure 2](#)

Download

[structure 1](#) [interface](#) [structure 2](#)

This interface scored

**0.404**

in Complex Formation Significance Score (CSS).

CSS ranges from 0 to 1 as interface relevance to complex formation increases.

Achieved CSS implies that the interface plays an auxiliary role in complex formation

|                                               | Structure 1 |        | Structure 2 |        |
|-----------------------------------------------|-------------|--------|-------------|--------|
| <b>Selection range</b>                        | [CPL]A:501  |        | A           |        |
| <b>class</b>                                  | Ligand      |        | Protein     |        |
| <b>symmetry operation</b>                     | x,y,z       |        | x,y,z       |        |
| <b>symmetry ID</b>                            | 1_555       |        | 0_555       |        |
| <b>Number of atoms</b>                        |             |        |             |        |
| <b>interface</b>                              | 23          | 82.1%  | 39          | 1.0%   |
| <b>surface</b>                                | 26          | 92.9%  | 2439        | 65.1%  |
| <b>total</b>                                  | 28          | 100.0% | 3746        | 100.0% |
| <b>Number of residues</b>                     |             |        |             |        |
| <b>interface</b>                              | 1           | 100.0% | 13          | 2.6%   |
| <b>surface</b>                                | 1           | 100.0% | 481         | 97.4%  |
| <b>total</b>                                  | 1           | 100.0% | 494         | 100.0% |
| <b>Solvent-accessible area, Å<sup>2</sup></b> |             |        |             |        |
| <b>interface</b>                              | 347.5       | 52.3%  | 279.7       | 1.0%   |
| <b>total</b>                                  | 664.6       | 100.0% | 27709.2     | 100.0% |
| <b>Solvation energy, kcal/mol</b>             |             |        |             |        |
| <b>isolated structure</b>                     | 4.2         | 100.0% | -444.3      | 100.0% |
| <b>gain on complex formation</b>              | 0.0         | 1.0%   | -3.2        | 0.7%   |
| <b>average gain</b>                           | -3.8        | -88.5% | -1.5        | 0.3%   |
| <b>P-value</b>                                | 0.804       |        | 0.200       |        |

### Hydrogen bonds

[XML](#)

No disulfide bonds found

No covalent bonds found

No salt bridges found

| ## | - Structure 1   | Dist. [Å] | - Structure 2   |
|----|-----------------|-----------|-----------------|
| 1  | A:CPL 501[ O1P] | 3.07      | A:ARG 412[ NH2] |
| 2  | A:CPL 501[ O1P] | 3.33      | A:ARG 412[ NH1] |
| 3  | A:CPL 501[ O4P] | 2.94      | A:ARG 412[ NH2] |

### Interfacing residues (not a contact table)

[XML](#)

Display level: [Residues](#)

Inaccessible residues

HSDC

Residues making **Hydrogen/Disulphide bond**, **Salt bridge** or **Covalent link**

Solvent-accessible residues

Interfacing residues

**ASA** Accessible Surface Area, Å<sup>2</sup> **BSA** Buried Surface Area, Å<sup>2</sup> **Δ<sup>1</sup>G** Solvation energy effect, kcal/mol ||||| Buried area percentage, one bar per 10%

| ## | Structure 1 | HSDC | ASA    | BSA    | Δ <sup>1</sup> G | ##    | Structure 2 | HSDC    | ASA   | BSA  | Δ <sup>1</sup> G |
|----|-------------|------|--------|--------|------------------|-------|-------------|---------|-------|------|------------------|
| 1  | A:CPL 501   | H    | 664.65 | 347.52 |                  | -0.04 | 1           | A:SER 1 | 4.04  | 0.00 | 0.00             |
|    |             |      |        |        |                  |       | 2           | A:ARG 2 | 66.31 | 0.00 | 0.00             |
|    |             |      |        |        |                  |       | 3           | A:CYS 3 | 0.17  | 0.00 | 0.00             |

|    |       |    |        |      |      |
|----|-------|----|--------|------|------|
| 4  | A:THR | 4  | 31.87  | 0.00 | 0.00 |
| 5  | A:HIS | 5  | 59.60  | 0.00 | 0.00 |
| 6  | A:LEU | 6  | 64.18  | 0.00 | 0.00 |
| 7  | A:GLU | 7  | 147.68 | 0.00 | 0.00 |
| 8  | A:ASN | 8  | 65.13  | 0.00 | 0.00 |
| 9  | A:ARG | 9  | 9.03   | 0.00 | 0.00 |
| 10 | A:ASP | 10 | 20.91  | 0.00 | 0.00 |
| 11 | A:PHE | 11 | 87.35  | 0.00 | 0.00 |
| 12 | A:VAL | 12 | 14.77  | 0.00 | 0.00 |
| 13 | A:THR | 13 | 105.26 | 0.00 | 0.00 |
| 14 | A:GLY | 14 | 18.72  | 0.00 | 0.00 |
| 15 | A:THR | 15 | 82.08  | 0.00 | 0.00 |
| 16 | A:GLN | 16 | 114.48 | 0.00 | 0.00 |
| 17 | A:GLY | 17 | 69.50  | 0.00 | 0.00 |
| 18 | A:THR | 18 | 58.84  | 0.00 | 0.00 |
| 19 | A:THR | 19 | 66.09  | 0.00 | 0.00 |
| 20 | A:ARG | 20 | 143.84 | 0.00 | 0.00 |
| 21 | A:VAL | 21 | 18.47  | 0.00 | 0.00 |
| 22 | A:THR | 22 | 35.53  | 0.00 | 0.00 |
| 23 | A:LEU | 23 | 2.32   | 0.00 | 0.00 |
| 24 | A:VAL | 24 | 4.95   | 0.00 | 0.00 |
| 25 | A:LEU | 25 | 4.35   | 0.00 | 0.00 |
| 26 | A:GLU | 26 | 35.93  | 0.00 | 0.00 |
| 27 | A:LEU | 27 | 34.77  | 0.00 | 0.00 |
| 28 | A:GLY | 28 | 58.11  | 0.00 | 0.00 |
| 29 | A:GLY | 29 | 8.75   | 0.00 | 0.00 |
| 30 | A:CYS | 30 | 5.10   | 0.00 | 0.00 |
| 31 | A:VAL | 31 | 5.69   | 0.00 | 0.00 |
| 32 | A:THR | 32 | 0.00   | 0.00 | 0.00 |
| 33 | A:ILE | 33 | 3.25   | 0.00 | 0.00 |
| 34 | A:THR | 34 | 27.47  | 0.00 | 0.00 |
| 35 | A:ALA | 35 | 20.61  | 0.00 | 0.00 |
| 36 | A:GLU | 36 | 123.01 | 0.00 | 0.00 |
| 37 | A:GLY | 37 | 35.12  | 0.00 | 0.00 |
| 38 | A:LYS | 38 | 52.27  | 0.00 | 0.00 |
| 39 | A:PRO | 39 | 14.13  | 0.00 | 0.00 |
| 40 | A:SER | 40 | 2.54   | 0.00 | 0.00 |
| 41 | A:MET | 41 | 1.17   | 0.00 | 0.00 |
| 42 | A:ASP | 42 | 0.00   | 0.00 | 0.00 |
| 43 | A:VAL | 43 | 0.50   | 0.00 | 0.00 |
| 44 | A:TRP | 44 | 10.10  | 0.00 | 0.00 |
| 45 | A:LEU | 45 | 4.92   | 0.00 | 0.00 |
| 46 | A:ASP | 46 | 64.19  | 0.00 | 0.00 |
| 47 | A:ALA | 47 | 15.55  | 0.00 | 0.00 |
| 48 | A:ILE | 48 | 0.00   | 0.00 | 0.00 |
| 49 | A:TYR | 49 | 45.43  | 0.00 | 0.00 |
| 50 | A:GLN | 50 | 4.00   | 0.00 | 0.00 |
| 51 | A:GLU | 51 | 95.58  | 0.00 | 0.00 |
| 52 | A:ASN | 52 | 104.84 | 0.00 | 0.00 |
| 53 | A:PRO | 53 | 14.62  | 0.00 | 0.00 |
| 54 | A:ALA | 54 | 59.76  | 0.00 | 0.00 |
| 55 | A:LYS | 55 | 99.24  | 0.00 | 0.00 |
| 56 | A:THR | 56 | 42.62  | 0.00 | 0.00 |
| 57 | A:ARG | 57 | 49.14  | 0.00 | 0.00 |
| 58 | A:GLU | 58 | 11.02  | 0.00 | 0.00 |
| 59 | A:TYR | 59 | 0.81   | 0.00 | 0.00 |
| 60 | A:CYS | 60 | 2.98   | 0.00 | 0.00 |
| 61 | A:LEU | 61 | 3.01   | 0.00 | 0.00 |
| 62 | A:HIS | 62 | 41.85  | 0.00 | 0.00 |
| 63 | A:ALA | 63 | 8.87   | 0.00 | 0.00 |
| 64 | A:LYS | 64 | 122.74 | 0.00 | 0.00 |
| 65 | A:LEU | 65 | 46.31  | 0.00 | 0.00 |
| 66 | A:SER | 66 | 57.05  | 0.00 | 0.00 |
| 67 | A:ASP | 67 | 93.81  | 0.00 | 0.00 |
| 68 | A:THR | 68 | 76.71  | 0.00 | 0.00 |
| 69 | A:LYS | 69 | 91.78  | 0.00 | 0.00 |
| 70 | A:VAL | 70 | 60.42  | 0.00 | 0.00 |
| 71 | A:ALA | 71 | 30.84  | 0.00 | 0.00 |
| 72 | A:ALA | 72 | 31.66  | 0.00 | 0.00 |

|     |       |     |        |      |      |
|-----|-------|-----|--------|------|------|
| 73  | A:ARG | 73  | 111.22 | 0.00 | 0.00 |
| 74  | A:CYS | 74  | 35.06  | 0.00 | 0.00 |
| 75  | A:PRO | 75  | 36.47  | 0.00 | 0.00 |
| 76  | A:THR | 76  | 99.30  | 0.00 | 0.00 |
| 77  | A:MET | 77  | 135.59 | 0.00 | 0.00 |
| 78  | A:GLY | 78  | 33.32  | 0.00 | 0.00 |
| 79  | A:PRO | 79  | 91.13  | 0.00 | 0.00 |
| 80  | A:ALA | 80  | 1.49   | 0.00 | 0.00 |
| 81  | A:THR | 81  | 89.89  | 0.00 | 0.00 |
| 82  | A:LEU | 82  | 28.42  | 0.00 | 0.00 |
| 83  | A:ALA | 83  | 77.82  | 0.00 | 0.00 |
| 84  | A:GLU | 84  | 32.66  | 0.00 | 0.00 |
| 85  | A:GLU | 85  | 52.70  | 0.00 | 0.00 |
| 86  | A:HIS | 86  | 159.33 | 0.00 | 0.00 |
| 87  | A:GLN | 87  | 113.80 | 0.00 | 0.00 |
| 88  | A:GLY | 88  | 52.60  | 0.00 | 0.00 |
| 89  | A:GLY | 89  | 22.38  | 0.00 | 0.00 |
| 90  | A:THR | 90  | 30.19  | 0.00 | 0.00 |
| 91  | A:VAL | 91  | 12.72  | 0.00 | 0.00 |
| 92  | A:CYS | 92  | 41.77  | 0.00 | 0.00 |
| 93  | A:LYS | 93  | 93.70  | 0.00 | 0.00 |
| 94  | A:ARG | 94  | 101.50 | 0.00 | 0.00 |
| 95  | A:ASP | 95  | 60.33  | 0.00 | 0.00 |
| 96  | A:GLN | 96  | 113.89 | 0.00 | 0.00 |
| 97  | A:SER | 97  | 5.11   | 0.00 | 0.00 |
| 98  | A:ASP | 98  | 97.77  | 0.00 | 0.00 |
| 99  | A:ARG | 99  | 35.12  | 0.00 | 0.00 |
| 100 | A:GLY | 100 | 5.27   | 0.00 | 0.00 |
| 101 | A:TRP | 101 | 184.07 | 0.00 | 0.00 |
| 102 | A:GLY | 102 | 79.65  | 0.00 | 0.00 |
| 103 | A:ASN | 103 | 48.25  | 0.00 | 0.00 |
| 104 | A:HIS | 104 | 192.64 | 0.00 | 0.00 |
| 105 | A:CYS | 105 | 19.81  | 0.00 | 0.00 |
| 106 | A:GLY | 106 | 52.63  | 0.00 | 0.00 |
| 107 | A:LEU | 107 | 101.90 | 0.00 | 0.00 |
| 108 | A:PHE | 108 | 139.45 | 0.00 | 0.00 |
| 109 | A:GLY | 109 | 30.32  | 0.00 | 0.00 |
| 110 | A:LYS | 110 | 114.38 | 0.00 | 0.00 |
| 111 | A:GLY | 111 | 4.23   | 0.00 | 0.00 |
| 112 | A:SER | 112 | 18.59  | 0.00 | 0.00 |
| 113 | A:ILE | 113 | 0.00   | 0.00 | 0.00 |
| 114 | A:VAL | 114 | 0.00   | 0.00 | 0.00 |
| 115 | A:ALA | 115 | 0.17   | 0.00 | 0.00 |
| 116 | A:CYS | 116 | 1.83   | 0.00 | 0.00 |
| 117 | A:VAL | 117 | 0.67   | 0.00 | 0.00 |
| 118 | A:LYS | 118 | 93.85  | 0.00 | 0.00 |
| 119 | A:ALA | 119 | 17.43  | 0.00 | 0.00 |
| 120 | A:ALA | 120 | 50.11  | 0.00 | 0.00 |
| 121 | A:CYS | 121 | 24.22  | 0.00 | 0.00 |
| 122 | A:GLU | 122 | 64.47  | 0.00 | 0.00 |
| 123 | A:ALA | 123 | 91.89  | 0.00 | 0.00 |
| 124 | A:LYS | 124 | 138.24 | 0.00 | 0.00 |
| 125 | A:LYS | 125 | 72.00  | 0.00 | 0.00 |
| 126 | A:LYS | 126 | 68.92  | 0.00 | 0.00 |
| 127 | A:ALA | 127 | 3.17   | 0.00 | 0.00 |
| 128 | A:THR | 128 | 11.80  | 0.00 | 0.00 |
| 129 | A:GLY | 129 | 0.00   | 0.00 | 0.00 |
| 130 | A:HIS | 130 | 6.13   | 0.00 | 0.00 |
| 131 | A:VAL | 131 | 46.31  | 0.00 | 0.00 |
| 132 | A:TYR | 132 | 16.12  | 0.00 | 0.00 |
| 133 | A:ASP | 133 | 54.11  | 0.00 | 0.00 |
| 134 | A:ALA | 134 | 49.87  | 0.00 | 0.00 |
| 135 | A:ASN | 135 | 111.23 | 0.00 | 0.00 |
| 136 | A:LYS | 136 | 128.53 | 0.00 | 0.00 |
| 137 | A:ILE | 137 | 0.12   | 0.00 | 0.00 |
| 138 | A:VAL | 138 | 27.17  | 0.00 | 0.00 |
| 139 | A:TYR | 139 | 2.00   | 0.00 | 0.00 |
| 140 | A:THR | 140 | 22.55  | 0.00 | 0.00 |
| 141 | A:VAL | 141 | 0.12   | 0.00 | 0.00 |

|     |       |     |        |      |      |
|-----|-------|-----|--------|------|------|
| 142 | A:LYS | 142 | 44.49  | 0.00 | 0.00 |
| 143 | A:VAL | 143 | 0.84   | 0.00 | 0.00 |
| 144 | A:GLU | 144 | 0.25   | 0.00 | 0.00 |
| 145 | A:PRO | 145 | 7.38   | 0.00 | 0.00 |
| 146 | A:HIS | 146 | 8.33   | 0.00 | 0.00 |
| 147 | A:THR | 147 | 35.21  | 0.00 | 0.00 |
| 148 | A:GLY | 148 | 16.28  | 0.00 | 0.00 |
| 149 | A:ASP | 149 | 49.00  | 0.00 | 0.00 |
| 150 | A:TYR | 150 | 83.28  | 0.00 | 0.00 |
| 151 | A:VAL | 151 | 27.89  | 0.00 | 0.00 |
| 152 | A:ALA | 152 | 54.35  | 0.00 | 0.00 |
| 153 | A:ALA | 153 | 86.37  | 0.00 | 0.00 |
| 154 | A:ASN | 154 | 145.43 | 0.00 | 0.00 |
| 155 | A:GLU | 155 | 103.24 | 0.00 | 0.00 |
| 156 | A:THR | 156 | 113.48 | 0.00 | 0.00 |
| 157 | A:HIS | 157 | 16.09  | 0.00 | 0.00 |
| 158 | A:SER | 158 | 119.10 | 0.00 | 0.00 |
| 159 | A:GLY | 159 | 21.12  | 0.00 | 0.00 |
| 160 | A:ARG | 160 | 64.09  | 0.00 | 0.00 |
| 161 | A:LYS | 161 | 83.09  | 0.00 | 0.00 |
| 162 | A:THR | 162 | 79.10  | 0.00 | 0.00 |
| 163 | A:ALA | 163 | 6.86   | 0.00 | 0.00 |
| 164 | A:SER | 164 | 77.00  | 0.00 | 0.00 |
| 165 | A:PHE | 165 | 2.37   | 0.00 | 0.00 |
| 166 | A:THR | 166 | 38.22  | 0.00 | 0.00 |
| 167 | A:VAL | 167 | 89.90  | 0.00 | 0.00 |
| 168 | A:SER | 168 | 98.65  | 0.00 | 0.00 |
| 169 | A:SER | 169 | 40.14  | 0.00 | 0.00 |
| 170 | A:GLU | 170 | 146.69 | 0.00 | 0.00 |
| 171 | A:LYS | 171 | 127.77 | 0.00 | 0.00 |
| 172 | A:THR | 172 | 43.48  | 0.00 | 0.00 |
| 173 | A:ILE | 173 | 95.72  | 0.00 | 0.00 |
| 174 | A:LEU | 174 | 21.93  | 0.00 | 0.00 |
| 175 | A:THR | 175 | 81.07  | 0.00 | 0.00 |
| 176 | A:MET | 176 | 13.11  | 0.00 | 0.00 |
| 177 | A:GLY | 177 | 61.62  | 0.00 | 0.00 |
| 178 | A:GLU | 178 | 119.63 | 0.00 | 0.00 |
| 179 | A:TYR | 179 | 30.05  | 0.00 | 0.00 |
| 180 | A:GLY | 180 | 10.72  | 0.00 | 0.00 |
| 181 | A:ASP | 181 | 34.67  | 0.00 | 0.00 |
| 182 | A:VAL | 182 | 2.62   | 0.00 | 0.00 |
| 183 | A:SER | 183 | 23.03  | 0.00 | 0.00 |
| 184 | A:LEU | 184 | 3.01   | 0.00 | 0.00 |
| 185 | A:LEU | 185 | 66.81  | 0.00 | 0.00 |
| 186 | A:CYS | 186 | 7.78   | 0.00 | 0.00 |
| 187 | A:ARG | 187 | 135.28 | 0.00 | 0.00 |
| 188 | A:VAL | 188 | 26.14  | 0.00 | 0.00 |
| 189 | A:ALA | 189 | 87.29  | 0.00 | 0.00 |
| 190 | A:SER | 190 | 19.06  | 0.00 | 0.00 |
| 191 | A:GLY | 191 | 13.78  | 0.00 | 0.00 |
| 192 | A:VAL | 192 | 22.46  | 0.00 | 0.00 |
| 193 | A:ASP | 193 | 88.10  | 0.00 | 0.00 |
| 194 | A:LEU | 194 | 24.08  | 0.00 | 0.00 |
| 195 | A:ALA | 195 | 76.02  | 0.00 | 0.00 |
| 196 | A:GLN | 196 | 80.45  | 0.00 | 0.00 |
| 197 | A:THR | 197 | 10.42  | 0.00 | 0.00 |
| 198 | A:VAL | 198 | 5.69   | 0.00 | 0.00 |
| 199 | A:ILE | 199 | 3.18   | 0.00 | 0.00 |
| 200 | A:LEU | 200 | 1.67   | 0.00 | 0.00 |
| 201 | A:GLU | 201 | 31.01  | 0.00 | 0.00 |
| 202 | A:LEU | 202 | 18.30  | 0.00 | 0.00 |
| 203 | A:ASP | 203 | 38.23  | 0.00 | 0.00 |
| 204 | A:LYS | 204 | 122.14 | 0.00 | 0.00 |
| 205 | A:THR | 205 | 98.46  | 0.00 | 0.00 |
| 206 | A:VAL | 206 | 72.55  | 0.00 | 0.00 |
| 207 | A:GLU | 207 | 144.46 | 0.00 | 0.00 |
| 208 | A:HIS | 208 | 175.54 | 0.00 | 0.00 |
| 209 | A:LEU | 209 | 62.63  | 0.00 | 0.00 |
| 210 | A:PRO | 210 | 59.42  | 0.00 | 0.00 |

|     |       |     |        |      |      |
|-----|-------|-----|--------|------|------|
| 211 | A:THR | 211 | 28.05  | 0.00 | 0.00 |
| 212 | A:ALA | 212 | 0.00   | 0.00 | 0.00 |
| 213 | A:TRP | 213 | 18.04  | 0.00 | 0.00 |
| 214 | A:GLN | 214 | 35.92  | 0.00 | 0.00 |
| 215 | A:VAL | 215 | 3.16   | 0.00 | 0.00 |
| 216 | A:HIS | 216 | 90.36  | 0.00 | 0.00 |
| 217 | A:ARG | 217 | 89.12  | 0.00 | 0.00 |
| 218 | A:ASP | 218 | 93.01  | 0.00 | 0.00 |
| 219 | A:TRP | 219 | 81.74  | 0.00 | 0.00 |
| 220 | A:PHE | 220 | 1.56   | 0.00 | 0.00 |
| 221 | A:ASN | 221 | 61.19  | 0.00 | 0.00 |
| 222 | A:ASP | 222 | 101.78 | 0.00 | 0.00 |
| 223 | A:LEU | 223 | 40.13  | 0.00 | 0.00 |
| 224 | A:ALA | 224 | 79.42  | 0.00 | 0.00 |
| 225 | A:LEU | 225 | 17.27  | 0.00 | 0.00 |
| 226 | A:PRO | 226 | 4.85   | 0.00 | 0.00 |
| 227 | A:TRP | 227 | 61.86  | 0.00 | 0.00 |
| 228 | A:LYS | 228 | 23.79  | 0.00 | 0.00 |
| 229 | A:HIS | 229 | 98.19  | 0.00 | 0.00 |
| 230 | A:GLU | 230 | 117.78 | 0.00 | 0.00 |
| 231 | A:GLY | 231 | 76.37  | 0.00 | 0.00 |
| 232 | A:ALA | 232 | 48.18  | 0.00 | 0.00 |
| 233 | A:GLN | 233 | 154.25 | 0.00 | 0.00 |
| 234 | A:ASN | 234 | 80.30  | 0.00 | 0.00 |
| 235 | A:TRP | 235 | 39.78  | 0.00 | 0.00 |
| 236 | A:ASN | 236 | 62.89  | 0.00 | 0.00 |
| 237 | A:ASN | 237 | 62.10  | 0.00 | 0.00 |
| 238 | A:ALA | 238 | 16.88  | 0.00 | 0.00 |
| 239 | A:GLU | 239 | 115.24 | 0.00 | 0.00 |
| 240 | A:ARG | 240 | 103.54 | 0.00 | 0.00 |
| 241 | A:LEU | 241 | 5.44   | 0.00 | 0.00 |
| 242 | A:VAL | 242 | 6.16   | 0.00 | 0.00 |
| 243 | A:GLU | 243 | 90.54  | 0.00 | 0.00 |
| 244 | A:PHE | 244 | 36.57  | 0.00 | 0.00 |
| 245 | A:GLY | 245 | 17.83  | 0.00 | 0.00 |
| 246 | A:ALA | 246 | 91.27  | 0.00 | 0.00 |
| 247 | A:PRO | 247 | 31.22  | 0.00 | 0.00 |
| 248 | A:HIS | 248 | 119.92 | 0.00 | 0.00 |
| 249 | A:ALA | 249 | 22.69  | 0.00 | 0.00 |
| 250 | A:VAL | 250 | 79.99  | 0.00 | 0.00 |
| 251 | A:LYS | 251 | 129.50 | 0.00 | 0.00 |
| 252 | A:MET | 252 | 12.69  | 0.00 | 0.00 |
| 253 | A:ASP | 253 | 72.00  | 0.00 | 0.00 |
| 254 | A:VAL | 254 | 34.83  | 0.00 | 0.00 |
| 255 | A:TYR | 255 | 115.21 | 0.00 | 0.00 |
| 256 | A:ASN | 256 | 65.31  | 0.00 | 0.00 |
| 257 | A:LEU | 257 | 99.59  | 0.00 | 0.00 |
| 258 | A:GLY | 258 | 22.46  | 0.00 | 0.00 |
| 259 | A:ASP | 259 | 61.51  | 0.00 | 0.00 |
| 260 | A:GLN | 260 | 41.02  | 0.00 | 0.00 |
| 261 | A:THR | 261 | 31.42  | 0.00 | 0.00 |
| 262 | A:GLY | 262 | 57.35  | 0.00 | 0.00 |
| 263 | A:VAL | 263 | 87.38  | 0.00 | 0.00 |
| 264 | A:LEU | 264 | 11.89  | 0.00 | 0.00 |
| 265 | A:LEU | 265 | 56.33  | 0.00 | 0.00 |
| 266 | A:LYS | 266 | 150.21 | 0.00 | 0.00 |
| 267 | A:ALA | 267 | 62.29  | 0.00 | 0.00 |
| 268 | A:LEU | 268 | 6.29   | 0.00 | 0.00 |
| 269 | A:ALA | 269 | 84.84  | 0.00 | 0.00 |
| 270 | A:GLY | 270 | 76.71  | 0.00 | 0.00 |
| 271 | A:VAL | 271 | 41.72  | 0.00 | 0.00 |
| 272 | A:PRO | 272 | 66.32  | 0.00 | 0.00 |
| 273 | A:VAL | 273 | 72.47  | 0.00 | 0.00 |
| 274 | A:ALA | 274 | 1.47   | 0.00 | 0.00 |
| 275 | A:HIS | 275 | 65.23  | 0.00 | 0.00 |
| 276 | A:ILE | 276 | 15.70  | 0.00 | 0.00 |
| 277 | A:GLU | 277 | 107.27 | 0.00 | 0.00 |
| 278 | A:GLY | 278 | 63.49  | 0.00 | 0.00 |
| 279 | A:THR | 279 | 63.87  | 0.00 | 0.00 |

|     |       |     |        |      |      |
|-----|-------|-----|--------|------|------|
| 280 | A:LYS | 280 | 81.07  | 0.00 | 0.00 |
| 281 | A:TYR | 281 | 25.03  | 0.00 | 0.00 |
| 282 | A:HIS | 282 | 36.08  | 0.00 | 0.00 |
| 283 | A:LEU | 283 | 1.84   | 0.00 | 0.00 |
| 284 | A:LYS | 284 | 113.23 | 0.00 | 0.00 |
| 285 | A:SER | 285 | 46.56  | 0.00 | 0.00 |
| 286 | A:GLY | 286 | 23.13  | 0.00 | 0.00 |
| 287 | A:HIS | 287 | 29.45  | 0.00 | 0.00 |
| 288 | A:VAL | 288 | 0.32   | 0.00 | 0.00 |
| 289 | A:THR | 289 | 7.50   | 0.00 | 0.00 |
| 290 | A:CYS | 290 | 2.77   | 0.00 | 0.00 |
| 291 | A:GLU | 291 | 45.78  | 0.00 | 0.00 |
| 292 | A:VAL | 292 | 1.66   | 0.00 | 0.00 |
| 293 | A:GLY | 293 | 9.33   | 0.00 | 0.00 |
| 294 | A:LEU | 294 | 4.84   | 0.00 | 0.00 |
| 295 | A:GLU | 295 | 113.26 | 0.00 | 0.00 |
| 296 | A:LYS | 296 | 115.25 | 0.00 | 0.00 |
| 297 | A:LEU | 297 | 9.99   | 0.00 | 0.00 |
| 298 | A:LYS | 298 | 125.57 | 0.00 | 0.00 |
| 299 | A:MET | 299 | 68.26  | 0.00 | 0.00 |
| 300 | A:LYS | 300 | 43.97  | 0.00 | 0.00 |
| 301 | A:GLY | 301 | 10.35  | 0.00 | 0.00 |
| 302 | A:LEU | 302 | 107.33 | 0.00 | 0.00 |
| 303 | A:THR | 303 | 132.02 | 0.00 | 0.00 |
| 304 | A:TYR | 304 | 75.83  | 0.00 | 0.00 |
| 305 | A:THR | 305 | 94.14  | 0.00 | 0.00 |
| 306 | A:MET | 306 | 101.62 | 0.00 | 0.00 |
| 307 | A:CYS | 307 | 10.44  | 0.00 | 0.00 |
| 308 | A:ASP | 308 | 74.30  | 0.00 | 0.00 |
| 309 | A:LYS | 309 | 131.91 | 0.00 | 0.00 |
| 310 | A:THR | 310 | 74.13  | 0.00 | 0.00 |
| 311 | A:LYS | 311 | 103.76 | 0.00 | 0.00 |
| 312 | A:PHE | 312 | 9.59   | 0.00 | 0.00 |
| 313 | A:THR | 313 | 75.95  | 0.00 | 0.00 |
| 314 | A:TRP | 314 | 68.99  | 0.00 | 0.00 |
| 315 | A:LYS | 315 | 124.05 | 0.00 | 0.00 |
| 316 | A:ARG | 316 | 140.85 | 0.00 | 0.00 |
| 317 | A:ALA | 317 | 49.57  | 0.00 | 0.00 |
| 318 | A:PRO | 318 | 7.24   | 0.00 | 0.00 |
| 319 | A:THR | 319 | 71.77  | 0.00 | 0.00 |
| 320 | A:ASP | 320 | 63.30  | 0.00 | 0.00 |
| 321 | A:SER | 321 | 22.85  | 0.00 | 0.00 |
| 322 | A:GLY | 322 | 74.71  | 0.00 | 0.00 |
| 323 | A:HIS | 323 | 40.31  | 0.00 | 0.00 |
| 324 | A:ASP | 324 | 40.41  | 0.00 | 0.00 |
| 325 | A:THR | 325 | 1.17   | 0.00 | 0.00 |
| 326 | A:VAL | 326 | 0.00   | 0.00 | 0.00 |
| 327 | A:VAL | 327 | 29.74  | 0.00 | 0.00 |
| 328 | A:MET | 328 | 3.88   | 0.00 | 0.00 |
| 329 | A:GLU | 329 | 28.12  | 0.00 | 0.00 |
| 330 | A:VAL | 330 | 5.58   | 0.00 | 0.00 |
| 331 | A:THR | 331 | 54.16  | 0.00 | 0.00 |
| 332 | A:PHE | 332 | 10.27  | 0.00 | 0.00 |
| 333 | A:SER | 333 | 64.87  | 0.00 | 0.00 |
| 334 | A:GLY | 334 | 37.20  | 0.00 | 0.00 |
| 335 | A:THR | 335 | 123.57 | 0.00 | 0.00 |
| 336 | A:LYS | 336 | 79.40  | 0.00 | 0.00 |
| 337 | A:PRO | 337 | 63.35  | 0.00 | 0.00 |
| 338 | A:CYS | 338 | 2.34   | 0.00 | 0.00 |
| 339 | A:ARG | 339 | 72.96  | 0.00 | 0.00 |
| 340 | A:ILE | 340 | 10.49  | 0.00 | 0.00 |
| 341 | A:PRO | 341 | 32.34  | 0.00 | 0.00 |
| 342 | A:VAL | 342 | 22.26  | 0.00 | 0.00 |
| 343 | A:ARG | 343 | 94.21  | 0.00 | 0.00 |
| 344 | A:ALA | 344 | 0.00   | 0.00 | 0.00 |
| 345 | A:VAL | 345 | 2.52   | 0.00 | 0.00 |
| 346 | A:ALA | 346 | 36.08  | 0.00 | 0.00 |
| 347 | A:HIS | 347 | 107.21 | 0.00 | 0.00 |
| 348 | A:GLY | 348 | 72.41  | 0.00 | 0.00 |

|     |       |     |        |       |      |
|-----|-------|-----|--------|-------|------|
| 349 | A:SER | 349 | 53.04  | 0.00  | 0.00 |
| 350 | A:PRO | 350 | 90.60  | 0.00  | 0.00 |
| 351 | A:ASP | 351 | 137.90 | 0.00  | 0.00 |
| 352 | A:VAL | 352 | 90.33  | 0.00  | 0.00 |
| 353 | A:ASN | 353 | 85.72  | 0.00  | 0.00 |
| 354 | A:VAL | 354 | 35.62  | 0.00  | 0.00 |
| 355 | A:ALA | 355 | 17.22  | 0.00  | 0.00 |
| 356 | A:MET | 356 | 135.79 | 0.00  | 0.00 |
| 357 | A:LEU | 357 | 55.83  | 0.00  | 0.00 |
| 358 | A:ILE | 358 | 20.12  | 0.00  | 0.00 |
| 359 | A:THR | 359 | 12.89  | 0.00  | 0.00 |
| 360 | A:PRO | 360 | 50.94  | 0.00  | 0.00 |
| 361 | A:ASN | 361 | 31.16  | 0.00  | 0.00 |
| 362 | A:PRO | 362 | 14.22  | 0.00  | 0.00 |
| 363 | A:THR | 363 | 20.57  | 0.00  | 0.00 |
| 364 | A:ILE | 364 | 8.20   | 0.00  | 0.00 |
| 365 | A:GLU | 365 | 35.96  | 0.00  | 0.00 |
| 366 | A:ASN | 366 | 122.06 | 0.00  | 0.00 |
| 367 | A:ASN | 367 | 149.20 | 0.00  | 0.00 |
| 368 | A:GLY | 368 | 33.89  | 0.00  | 0.00 |
| 369 | A:GLY | 369 | 23.84  | 0.00  | 0.00 |
| 370 | A:GLY | 370 | 2.75   | 0.00  | 0.00 |
| 371 | A:PHE | 371 | 15.37  | 0.00  | 0.00 |
| 372 | A:ILE | 372 | 0.00   | 0.00  | 0.00 |
| 373 | A:GLU | 373 | 0.00   | 0.00  | 0.00 |
| 374 | A:MET | 374 | 0.00   | 0.00  | 0.00 |
| 375 | A:GLN | 375 | 51.01  | 0.00  | 0.00 |
| 376 | A:LEU | 376 | 3.69   | 0.00  | 0.00 |
| 377 | A:PRO | 377 | 45.82  | 0.00  | 0.00 |
| 378 | A:PRO | 378 | 54.33  | 0.00  | 0.00 |
| 379 | A:GLY | 379 | 24.22  | 0.00  | 0.00 |
| 380 | A:ASP | 380 | 68.35  | 0.00  | 0.00 |
| 381 | A:ASN | 381 | 2.30   | 0.00  | 0.00 |
| 382 | A:ILE | 382 | 26.77  | 0.00  | 0.00 |
| 383 | A:ILE | 383 | 0.12   | 0.00  | 0.00 |
| 384 | A:TYR | 384 | 56.65  | 0.00  | 0.00 |
| 385 | A:VAL | 385 | 0.15   | 0.00  | 0.00 |
| 386 | A:GLY | 386 | 20.09  | 0.00  | 0.00 |
| 387 | A:GLU | 387 | 109.09 | 0.00  | 0.00 |
| 388 | A:LEU | 388 | 44.39  | 0.00  | 0.00 |
| 389 | A:SER | 389 | 63.19  | 0.00  | 0.00 |
| 390 | A:HIS | 390 | 63.24  | 0.00  | 0.00 |
| 391 | A:GLN | 391 | 117.74 | 0.00  | 0.00 |
| 392 | A:TRP | 392 | 38.02  | 0.00  | 0.00 |
| 393 | A:PHE | 393 | 147.35 | 0.00  | 0.00 |
| 394 | A:GLN | 394 | 3.61   | 0.00  | 0.00 |
| 395 | A:LYS | 395 | 109.76 | 0.00  | 0.00 |
| 396 | A:GLY | 396 | 54.69  | 0.00  | 0.00 |
| 397 | A:SER | 397 | 52.78  | 0.00  | 0.00 |
| 398 | A:SER | 398 | 72.13  | 0.00  | 0.00 |
| 399 | A:ILE | 399 | 147.01 | 0.00  | 0.00 |
| 400 | A:GLY | 400 | 30.98  | 0.00  | 0.00 |
| 401 | A:ARG | 401 | 55.06  | 0.00  | 0.00 |
| 402 | A:VAL | 402 | 98.89  | 18.53 | 0.29 |
| 403 | A:PHE | 403 | 135.14 | 0.00  | 0.00 |
| 404 | A:GLN | 404 | 100.64 | 0.00  | 0.00 |
| 405 | A:LYS | 405 | 155.66 | 25.39 | 0.21 |
| 406 | A:THR | 406 | 80.60  | 53.04 | 0.33 |
| 407 | A:LYS | 407 | 99.25  | 0.00  | 0.00 |
| 408 | A:LYS | 408 | 74.62  | 1.17  | 0.02 |
| 409 | A:GLY | 409 | 26.00  | 24.98 | 0.36 |
| 410 | A:ILE | 410 | 102.02 | 18.05 | 0.29 |
| 411 | A:GLU | 411 | 83.44  | 0.00  | 0.00 |
| 412 | A:ARG | 412 | 43.19  | 24.60 | 0.50 |
| 413 | A:LEU | 413 | 56.61  | 21.23 | 0.34 |
| 414 | A:THR | 414 | 74.95  | 0.00  | 0.00 |
| 415 | A:VAL | 415 | 107.87 | 0.00  | 0.00 |
| 416 | A:ILE | 416 | 15.46  | 0.00  | 0.00 |
| 417 | A:GLY | 417 | 20.85  | 0.00  | 0.00 |

|     |       |     |        |       |       |
|-----|-------|-----|--------|-------|-------|
| 418 | A:GLU | 418 | 61.48  | 0.00  | 0.00  |
| 419 | A:HIS | 419 | 50.51  | 0.00  | 0.00  |
| 420 | A:ALA | 420 | 14.50  | 13.33 | -0.03 |
| 421 | A:TRP | 421 | 79.24  | 37.12 | 0.53  |
| 422 | A:ASP | 422 | 28.25  | 0.00  | 0.00  |
| 423 | A:PHE | 423 | 39.74  | 23.04 | 0.04  |
| 424 | A:GLY | 424 | 32.28  | 0.00  | 0.00  |
| 425 | A:SER | 425 | 34.72  | 3.51  | 0.06  |
| 426 | A:ALA | 426 | 116.00 | 0.00  | 0.00  |
| 427 | A:GLY | 427 | 51.23  | 0.00  | 0.00  |
| 428 | A:GLY | 428 | 50.43  | 0.00  | 0.00  |
| 429 | A:PHE | 429 | 167.93 | 0.00  | 0.00  |
| 430 | A:LEU | 430 | 147.49 | 15.72 | 0.25  |
| 431 | A:SER | 431 | 15.43  | 0.00  | 0.00  |
| 432 | A:SER | 432 | 66.48  | 0.00  | 0.00  |
| 433 | A:ILE | 433 | 100.74 | 0.00  | 0.00  |
| 434 | A:GLY | 434 | 11.96  | 0.00  | 0.00  |
| 435 | A:LYS | 435 | 76.81  | 0.00  | 0.00  |
| 436 | A:ALA | 436 | 53.20  | 0.00  | 0.00  |
| 437 | A:VAL | 437 | 84.46  | 0.00  | 0.00  |
| 438 | A:HIS | 438 | 56.25  | 0.00  | 0.00  |
| 439 | A:THR | 439 | 65.43  | 0.00  | 0.00  |
| 440 | A:VAL | 440 | 98.97  | 0.00  | 0.00  |
| 441 | A:LEU | 441 | 121.82 | 0.00  | 0.00  |
| 442 | A:GLY | 442 | 32.48  | 0.00  | 0.00  |
| 443 | A:GLY | 443 | 38.24  | 0.00  | 0.00  |
| 444 | A:ALA | 444 | 62.91  | 0.00  | 0.00  |
| 445 | A:PHE | 445 | 41.55  | 0.00  | 0.00  |
| 446 | A:ASN | 446 | 100.51 | 0.00  | 0.00  |
| 447 | A:SER | 447 | 94.79  | 0.00  | 0.00  |
| 448 | A:ILE | 448 | 112.16 | 0.00  | 0.00  |
| 449 | A:PHE | 449 | 25.19  | 0.00  | 0.00  |
| 450 | A:GLY | 450 | 46.09  | 0.00  | 0.00  |
| 451 | A:GLY | 451 | 83.38  | 0.00  | 0.00  |
| 452 | A:VAL | 452 | 56.98  | 0.00  | 0.00  |
| 453 | A:GLY | 453 | 35.78  | 0.00  | 0.00  |
| 454 | A:PHE | 454 | 91.84  | 0.00  | 0.00  |
| 455 | A:LEU | 455 | 120.38 | 0.00  | 0.00  |
| 456 | A:PRO | 456 | 64.32  | 0.00  | 0.00  |
| 457 | A:LYS | 457 | 35.12  | 0.00  | 0.00  |
| 458 | A:LEU | 458 | 52.81  | 0.00  | 0.00  |
| 459 | A:LEU | 459 | 123.34 | 0.00  | 0.00  |
| 460 | A:LEU | 460 | 78.94  | 0.00  | 0.00  |
| 461 | A:GLY | 461 | 0.14   | 0.00  | 0.00  |
| 462 | A:VAL | 462 | 76.66  | 0.00  | 0.00  |
| 463 | A:ALA | 463 | 50.59  | 0.00  | 0.00  |
| 464 | A:LEU | 464 | 55.72  | 0.00  | 0.00  |
| 465 | A:ALA | 465 | 22.48  | 0.00  | 0.00  |
| 466 | A:TRP | 466 | 154.35 | 0.00  | 0.00  |
| 467 | A:LEU | 467 | 80.28  | 0.00  | 0.00  |
| 468 | A:GLY | 468 | 0.17   | 0.00  | 0.00  |
| 469 | A:LEU | 469 | 123.39 | 0.00  | 0.00  |
| 470 | A:ASN | 470 | 87.85  | 0.00  | 0.00  |
| 471 | A:MET | 471 | 58.58  | 0.00  | 0.00  |
| 472 | A:ARG | 472 | 217.43 | 0.00  | 0.00  |
| 473 | A:ASN | 473 | 59.59  | 0.00  | 0.00  |
| 474 | A:PRO | 474 | 98.38  | 0.00  | 0.00  |
| 475 | A:THR | 475 | 100.49 | 0.00  | 0.00  |
| 476 | A:MET | 476 | 93.99  | 0.00  | 0.00  |
| 477 | A:SER | 477 | 13.07  | 0.00  | 0.00  |
| 478 | A:MET | 478 | 141.64 | 0.00  | 0.00  |
| 479 | A:SER | 479 | 70.17  | 0.00  | 0.00  |
| 480 | A:PHE | 480 | 74.65  | 0.00  | 0.00  |
| 481 | A:LEU | 481 | 60.26  | 0.00  | 0.00  |
| 482 | A:LEU | 482 | 115.41 | 0.00  | 0.00  |
| 483 | A:ALA | 483 | 50.75  | 0.00  | 0.00  |
| 484 | A:GLY | 484 | 0.00   | 0.00  | 0.00  |
| 485 | A:GLY | 485 | 33.16  | 0.00  | 0.00  |
| 486 | A:LEU | 486 | 108.69 | 0.00  | 0.00  |



|     |       |     |        |      |      |
|-----|-------|-----|--------|------|------|
| 487 | A:VAL | 487 | 16.50  | 0.00 | 0.00 |
| 488 | A:LEU | 488 | 40.84  | 0.00 | 0.00 |
| 489 | A:ALA | 489 | 65.30  | 0.00 | 0.00 |
| 490 | A:MET | 490 | 81.75  | 0.00 | 0.00 |
| 491 | A:THR | 491 | 5.80   | 0.00 | 0.00 |
| 492 | A:LEU | 492 | 118.58 | 0.00 | 0.00 |
| 493 | A:GLY | 493 | 63.66  | 0.00 | 0.00 |
| 494 | A:VAL | 494 | 125.71 | 0.00 | 0.00 |

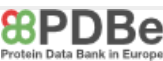

is a member of

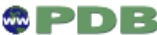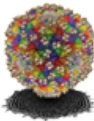

EMDataBank  
Unified Data Resource for 3DEM

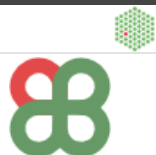

Protein Data

PDBePISA

Bank

[pdbe.org/pisa](http://pdbe.org/pisa)

in Europe

Bringing Structure  
to Biology

Feedback

Share

Services

Research

Training

About us

www.PDB

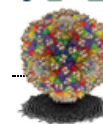

EMDataBank

Unified Data Resource for 3DEM

## PISA Interface.

Session Map (id=179-P6-IE2)

Start Interfaces Interface Search  
Monomers  
Assemblies

interface # 27 in ourmodelfortest2.pdb crystal.

Space symmetry group: P 1

interface #27/96

XML << < > >>

### Interface Summary

XML

View structure 1 interface structure 2

Download

structure 1 interface structure 2

This interface scored

**0.404**

in Complex Formation Significance Score (CSS).

CSS ranges from 0 to 1 as interface relevance to complex formation increases.

Achieved CSS implies that the interface plays an auxiliary role in complex formation

|                                   | Structure 1 |        | Structure 2 |        |
|-----------------------------------|-------------|--------|-------------|--------|
| <b>Selection range</b>            | [CPL]B:501  |        | B           |        |
| <b>class</b>                      | Ligand      |        | Protein     |        |
| <b>symmetry operation</b>         | x,y,z       |        | x,y,z       |        |
| <b>symmetry ID</b>                | 1_555       |        | 0_555       |        |
| <b>Number of atoms</b>            |             |        |             |        |
| interface                         | 23          | 82.1%  | 43          | 1.1%   |
| surface                           | 27          | 96.4%  | 2443        | 65.2%  |
| total                             | 28          | 100.0% | 3746        | 100.0% |
| <b>Number of residues</b>         |             |        |             |        |
| interface                         | 1           | 100.0% | 15          | 3.0%   |
| surface                           | 1           | 100.0% | 485         | 98.2%  |
| total                             | 1           | 100.0% | 494         | 100.0% |
| <b>Solvent-accessible area, Å</b> |             |        |             |        |
| interface                         | 351.5       | 51.8%  | 302.8       | 1.1%   |
| total                             | 678.8       | 100.0% | 27658.7     | 100.0% |
| <b>Solvation energy, kcal/mol</b> |             |        |             |        |
| isolated structure                | 5.5         | 100.0% | -446.5      | 100.0% |
| gain on complex formation         | -3.0        | -54.7% | -2.7        | 0.6%   |
| average gain                      | -4.7        | -85.2% | -1.6        | 0.4%   |
| P-value                           | 0.659       |        | 0.303       |        |

### Hydrogen bonds

XML

No disulfide bonds found

No covalent bonds found

No salt bridges found

| ## | - Structure 1   | Dist. [Å] | - Structure 2   |
|----|-----------------|-----------|-----------------|
| 1  | B:CPL 501[ O1P] | 2.92      | B:ARG 412[ NH2] |
| 2  | B:CPL 501[ O31] | 2.82      | B:THR 406[ OG1] |

### Interfacing residues (not a contact table)

XML

Display level: Residues

Inaccessible residues

HSDC

Residues making Hydrogen/Disulphide bond, Salt bridge or Covalent link

Solvent-accessible residues

Interfacing residues

ASA Accessible Surface Area, Å<sup>2</sup> BSA Buried Surface Area, Å<sup>2</sup> Δ<sup>i</sup>G Solvation energy effect, kcal/mol |||| Buried area percentage, one bar per 10%

| ## | Structure 1 | HSDC | ASA    | BSA    | Δ <sup>i</sup> G | ## | Structure 2 | HSDC | ASA   | BSA  | Δ <sup>i</sup> G |
|----|-------------|------|--------|--------|------------------|----|-------------|------|-------|------|------------------|
| 1  | B:CPL 501   | H    | 678.83 | 351.55 | 3.03             | 1  | B:SER 1     |      | 13.19 | 0.00 | 0.00             |
|    |             |      |        |        |                  | 2  | B:ARG 2     |      | 62.08 | 0.00 | 0.00             |
|    |             |      |        |        |                  | 3  | B:CYS 3     |      | 0.00  | 0.00 | 0.00             |
|    |             |      |        |        |                  | 4  | B:THR 4     |      | 26.46 | 0.00 | 0.00             |

|    |       |    |        |      |      |
|----|-------|----|--------|------|------|
| 5  | B:HIS | 5  | 71.79  | 0.00 | 0.00 |
| 6  | B:LEU | 6  | 49.54  | 0.00 | 0.00 |
| 7  | B:GLU | 7  | 172.99 | 0.00 | 0.00 |
| 8  | B:ASN | 8  | 67.62  | 0.00 | 0.00 |
| 9  | B:ARG | 9  | 9.60   | 0.00 | 0.00 |
| 10 | B:ASP | 10 | 14.86  | 0.00 | 0.00 |
| 11 | B:PHE | 11 | 72.10  | 0.00 | 0.00 |
| 12 | B:VAL | 12 | 19.22  | 0.00 | 0.00 |
| 13 | B:THR | 13 | 95.23  | 0.00 | 0.00 |
| 14 | B:GLY | 14 | 18.51  | 0.00 | 0.00 |
| 15 | B:THR | 15 | 97.73  | 0.00 | 0.00 |
| 16 | B:GLN | 16 | 159.83 | 0.00 | 0.00 |
| 17 | B:GLY | 17 | 66.54  | 0.00 | 0.00 |
| 18 | B:THR | 18 | 51.44  | 0.00 | 0.00 |
| 19 | B:THR | 19 | 65.81  | 0.00 | 0.00 |
| 20 | B:ARG | 20 | 144.33 | 0.00 | 0.00 |
| 21 | B:VAL | 21 | 17.37  | 0.00 | 0.00 |
| 22 | B:THR | 22 | 26.28  | 0.00 | 0.00 |
| 23 | B:LEU | 23 | 0.17   | 0.00 | 0.00 |
| 24 | B:VAL | 24 | 3.44   | 0.00 | 0.00 |
| 25 | B:LEU | 25 | 4.19   | 0.00 | 0.00 |
| 26 | B:GLU | 26 | 41.84  | 0.00 | 0.00 |
| 27 | B:LEU | 27 | 34.43  | 0.00 | 0.00 |
| 28 | B:GLY | 28 | 54.39  | 0.00 | 0.00 |
| 29 | B:GLY | 29 | 7.41   | 0.00 | 0.00 |
| 30 | B:CYS | 30 | 9.61   | 0.00 | 0.00 |
| 31 | B:VAL | 31 | 6.52   | 0.00 | 0.00 |
| 32 | B:THR | 32 | 0.24   | 0.00 | 0.00 |
| 33 | B:ILE | 33 | 4.52   | 0.00 | 0.00 |
| 34 | B:THR | 34 | 28.86  | 0.00 | 0.00 |
| 35 | B:ALA | 35 | 18.64  | 0.00 | 0.00 |
| 36 | B:GLU | 36 | 90.86  | 0.00 | 0.00 |
| 37 | B:GLY | 37 | 49.68  | 0.00 | 0.00 |
| 38 | B:LYS | 38 | 59.39  | 0.00 | 0.00 |
| 39 | B:PRO | 39 | 11.15  | 0.00 | 0.00 |
| 40 | B:SER | 40 | 3.71   | 0.00 | 0.00 |
| 41 | B:MET | 41 | 0.50   | 0.00 | 0.00 |
| 42 | B:ASP | 42 | 0.00   | 0.00 | 0.00 |
| 43 | B:VAL | 43 | 1.50   | 0.00 | 0.00 |
| 44 | B:TRP | 44 | 11.17  | 0.00 | 0.00 |
| 45 | B:LEU | 45 | 4.80   | 0.00 | 0.00 |
| 46 | B:ASP | 46 | 63.90  | 0.00 | 0.00 |
| 47 | B:ALA | 47 | 16.50  | 0.00 | 0.00 |
| 48 | B:ILE | 48 | 0.17   | 0.00 | 0.00 |
| 49 | B:TYR | 49 | 42.21  | 0.00 | 0.00 |
| 50 | B:GLN | 50 | 6.18   | 0.00 | 0.00 |
| 51 | B:GLU | 51 | 86.82  | 0.00 | 0.00 |
| 52 | B:ASN | 52 | 106.48 | 0.00 | 0.00 |
| 53 | B:PRO | 53 | 14.50  | 0.00 | 0.00 |
| 54 | B:ALA | 54 | 51.97  | 0.00 | 0.00 |
| 55 | B:LYS | 55 | 107.55 | 0.00 | 0.00 |
| 56 | B:THR | 56 | 36.79  | 0.00 | 0.00 |
| 57 | B:ARG | 57 | 53.86  | 0.00 | 0.00 |
| 58 | B:GLU | 58 | 20.06  | 0.00 | 0.00 |
| 59 | B:TYR | 59 | 2.60   | 0.00 | 0.00 |
| 60 | B:CYS | 60 | 2.65   | 0.00 | 0.00 |
| 61 | B:LEU | 61 | 4.69   | 0.00 | 0.00 |
| 62 | B:HIS | 62 | 50.03  | 0.00 | 0.00 |
| 63 | B:ALA | 63 | 8.96   | 0.00 | 0.00 |
| 64 | B:LYS | 64 | 116.66 | 0.00 | 0.00 |
| 65 | B:LEU | 65 | 46.30  | 0.00 | 0.00 |
| 66 | B:SER | 66 | 55.95  | 0.00 | 0.00 |
| 67 | B:ASP | 67 | 76.08  | 0.00 | 0.00 |
| 68 | B:THR | 68 | 86.97  | 0.00 | 0.00 |
| 69 | B:LYS | 69 | 96.96  | 0.00 | 0.00 |
| 70 | B:VAL | 70 | 62.09  | 0.00 | 0.00 |
| 71 | B:ALA | 71 | 30.26  | 0.00 | 0.00 |
| 72 | B:ALA | 72 | 25.65  | 0.00 | 0.00 |
| 73 | B:ARG | 73 | 108.62 | 0.00 | 0.00 |

|     |       |     |        |      |      |
|-----|-------|-----|--------|------|------|
| 74  | B:CYS | 74  | 34.99  | 0.00 | 0.00 |
| 75  | B:PRO | 75  | 29.22  | 0.00 | 0.00 |
| 76  | B:THR | 76  | 90.66  | 0.00 | 0.00 |
| 77  | B:MET | 77  | 130.59 | 0.00 | 0.00 |
| 78  | B:GLY | 78  | 33.91  | 0.00 | 0.00 |
| 79  | B:PRO | 79  | 86.74  | 0.00 | 0.00 |
| 80  | B:ALA | 80  | 1.83   | 0.00 | 0.00 |
| 81  | B:THR | 81  | 95.63  | 0.00 | 0.00 |
| 82  | B:LEU | 82  | 37.13  | 0.00 | 0.00 |
| 83  | B:ALA | 83  | 72.12  | 0.00 | 0.00 |
| 84  | B:GLU | 84  | 33.22  | 0.00 | 0.00 |
| 85  | B:GLU | 85  | 59.77  | 0.00 | 0.00 |
| 86  | B:HIS | 86  | 165.39 | 0.00 | 0.00 |
| 87  | B:GLN | 87  | 111.68 | 0.00 | 0.00 |
| 88  | B:GLY | 88  | 49.83  | 0.00 | 0.00 |
| 89  | B:GLY | 89  | 23.11  | 0.00 | 0.00 |
| 90  | B:THR | 90  | 29.93  | 0.00 | 0.00 |
| 91  | B:VAL | 91  | 16.39  | 0.00 | 0.00 |
| 92  | B:CYS | 92  | 39.69  | 0.00 | 0.00 |
| 93  | B:LYS | 93  | 88.51  | 0.00 | 0.00 |
| 94  | B:ARG | 94  | 106.99 | 0.00 | 0.00 |
| 95  | B:ASP | 95  | 52.11  | 0.00 | 0.00 |
| 96  | B:GLN | 96  | 108.11 | 0.00 | 0.00 |
| 97  | B:SER | 97  | 3.35   | 0.00 | 0.00 |
| 98  | B:ASP | 98  | 97.65  | 0.00 | 0.00 |
| 99  | B:ARG | 99  | 32.90  | 0.00 | 0.00 |
| 100 | B:GLY | 100 | 4.01   | 0.00 | 0.00 |
| 101 | B:TRP | 101 | 177.25 | 0.00 | 0.00 |
| 102 | B:GLY | 102 | 76.61  | 0.00 | 0.00 |
| 103 | B:ASN | 103 | 41.34  | 0.00 | 0.00 |
| 104 | B:HIS | 104 | 170.10 | 0.00 | 0.00 |
| 105 | B:CYS | 105 | 6.20   | 0.00 | 0.00 |
| 106 | B:GLY | 106 | 57.55  | 0.00 | 0.00 |
| 107 | B:LEU | 107 | 100.01 | 0.00 | 0.00 |
| 108 | B:PHE | 108 | 138.71 | 0.00 | 0.00 |
| 109 | B:GLY | 109 | 29.80  | 0.00 | 0.00 |
| 110 | B:LYS | 110 | 114.93 | 0.00 | 0.00 |
| 111 | B:GLY | 111 | 0.82   | 0.00 | 0.00 |
| 112 | B:SER | 112 | 25.30  | 0.00 | 0.00 |
| 113 | B:ILE | 113 | 0.12   | 0.00 | 0.00 |
| 114 | B:VAL | 114 | 0.50   | 0.00 | 0.00 |
| 115 | B:ALA | 115 | 2.32   | 0.00 | 0.00 |
| 116 | B:CYS | 116 | 2.09   | 0.00 | 0.00 |
| 117 | B:VAL | 117 | 2.98   | 0.00 | 0.00 |
| 118 | B:LYS | 118 | 82.26  | 0.00 | 0.00 |
| 119 | B:ALA | 119 | 13.89  | 0.00 | 0.00 |
| 120 | B:ALA | 120 | 54.15  | 0.00 | 0.00 |
| 121 | B:CYS | 121 | 22.94  | 0.00 | 0.00 |
| 122 | B:GLU | 122 | 56.40  | 0.00 | 0.00 |
| 123 | B:ALA | 123 | 76.55  | 0.00 | 0.00 |
| 124 | B:LYS | 124 | 144.92 | 0.00 | 0.00 |
| 125 | B:LYS | 125 | 70.16  | 0.00 | 0.00 |
| 126 | B:LYS | 126 | 76.17  | 0.00 | 0.00 |
| 127 | B:ALA | 127 | 3.16   | 0.00 | 0.00 |
| 128 | B:THR | 128 | 18.86  | 0.00 | 0.00 |
| 129 | B:GLY | 129 | 0.00   | 0.00 | 0.00 |
| 130 | B:HIS | 130 | 7.88   | 0.00 | 0.00 |
| 131 | B:VAL | 131 | 45.50  | 0.00 | 0.00 |
| 132 | B:TYR | 132 | 18.90  | 0.00 | 0.00 |
| 133 | B:ASP | 133 | 66.44  | 0.00 | 0.00 |
| 134 | B:ALA | 134 | 53.14  | 0.00 | 0.00 |
| 135 | B:ASN | 135 | 113.50 | 0.00 | 0.00 |
| 136 | B:LYS | 136 | 125.12 | 0.00 | 0.00 |
| 137 | B:ILE | 137 | 2.10   | 0.00 | 0.00 |
| 138 | B:VAL | 138 | 28.40  | 0.00 | 0.00 |
| 139 | B:TYR | 139 | 2.99   | 0.00 | 0.00 |
| 140 | B:THR | 140 | 23.67  | 0.00 | 0.00 |
| 141 | B:VAL | 141 | 0.67   | 0.00 | 0.00 |
| 142 | B:LYS | 142 | 42.00  | 0.00 | 0.00 |

|     |       |     |        |      |      |
|-----|-------|-----|--------|------|------|
| 143 | B:VAL | 143 | 0.82   | 0.00 | 0.00 |
| 144 | B:GLU | 144 | 0.98   | 0.00 | 0.00 |
| 145 | B:PRO | 145 | 5.08   | 0.00 | 0.00 |
| 146 | B:HIS | 146 | 18.49  | 0.00 | 0.00 |
| 147 | B:THR | 147 | 35.71  | 0.00 | 0.00 |
| 148 | B:GLY | 148 | 19.54  | 0.00 | 0.00 |
| 149 | B:ASP | 149 | 67.55  | 0.00 | 0.00 |
| 150 | B:TYR | 150 | 68.66  | 0.00 | 0.00 |
| 151 | B:VAL | 151 | 38.49  | 0.00 | 0.00 |
| 152 | B:ALA | 152 | 51.62  | 0.00 | 0.00 |
| 153 | B:ALA | 153 | 90.69  | 0.00 | 0.00 |
| 154 | B:ASN | 154 | 138.75 | 0.00 | 0.00 |
| 155 | B:GLU | 155 | 88.06  | 0.00 | 0.00 |
| 156 | B:THR | 156 | 129.25 | 0.00 | 0.00 |
| 157 | B:HIS | 157 | 25.58  | 0.00 | 0.00 |
| 158 | B:SER | 158 | 115.86 | 0.00 | 0.00 |
| 159 | B:GLY | 159 | 17.57  | 0.00 | 0.00 |
| 160 | B:ARG | 160 | 76.96  | 0.00 | 0.00 |
| 161 | B:LYS | 161 | 75.13  | 0.00 | 0.00 |
| 162 | B:THR | 162 | 81.19  | 0.00 | 0.00 |
| 163 | B:ALA | 163 | 5.50   | 0.00 | 0.00 |
| 164 | B:SER | 164 | 72.97  | 0.00 | 0.00 |
| 165 | B:PHE | 165 | 1.29   | 0.00 | 0.00 |
| 166 | B:THR | 166 | 36.71  | 0.00 | 0.00 |
| 167 | B:VAL | 167 | 83.35  | 0.00 | 0.00 |
| 168 | B:SER | 168 | 74.77  | 0.00 | 0.00 |
| 169 | B:SER | 169 | 74.87  | 0.00 | 0.00 |
| 170 | B:GLU | 170 | 65.76  | 0.00 | 0.00 |
| 171 | B:LYS | 171 | 123.55 | 0.00 | 0.00 |
| 172 | B:THR | 172 | 40.75  | 0.00 | 0.00 |
| 173 | B:ILE | 173 | 93.30  | 0.00 | 0.00 |
| 174 | B:LEU | 174 | 17.67  | 0.00 | 0.00 |
| 175 | B:THR | 175 | 90.16  | 0.00 | 0.00 |
| 176 | B:MET | 176 | 12.22  | 0.00 | 0.00 |
| 177 | B:GLY | 177 | 58.43  | 0.00 | 0.00 |
| 178 | B:GLU | 178 | 102.49 | 0.00 | 0.00 |
| 179 | B:TYR | 179 | 29.99  | 0.00 | 0.00 |
| 180 | B:GLY | 180 | 11.49  | 0.00 | 0.00 |
| 181 | B:ASP | 181 | 36.75  | 0.00 | 0.00 |
| 182 | B:VAL | 182 | 2.77   | 0.00 | 0.00 |
| 183 | B:SER | 183 | 26.79  | 0.00 | 0.00 |
| 184 | B:LEU | 184 | 1.28   | 0.00 | 0.00 |
| 185 | B:LEU | 185 | 30.39  | 0.00 | 0.00 |
| 186 | B:CYS | 186 | 2.33   | 0.00 | 0.00 |
| 187 | B:ARG | 187 | 126.37 | 0.00 | 0.00 |
| 188 | B:VAL | 188 | 15.85  | 0.00 | 0.00 |
| 189 | B:ALA | 189 | 99.88  | 0.00 | 0.00 |
| 190 | B:SER | 190 | 34.31  | 0.00 | 0.00 |
| 191 | B:GLY | 191 | 10.49  | 0.00 | 0.00 |
| 192 | B:VAL | 192 | 21.78  | 0.00 | 0.00 |
| 193 | B:ASP | 193 | 88.32  | 0.00 | 0.00 |
| 194 | B:LEU | 194 | 36.05  | 0.00 | 0.00 |
| 195 | B:ALA | 195 | 75.11  | 0.00 | 0.00 |
| 196 | B:GLN | 196 | 82.27  | 0.00 | 0.00 |
| 197 | B:THR | 197 | 18.06  | 0.00 | 0.00 |
| 198 | B:VAL | 198 | 2.02   | 0.00 | 0.00 |
| 199 | B:ILE | 199 | 2.35   | 0.00 | 0.00 |
| 200 | B:LEU | 200 | 1.17   | 0.00 | 0.00 |
| 201 | B:GLU | 201 | 19.84  | 0.00 | 0.00 |
| 202 | B:LEU | 202 | 25.30  | 0.00 | 0.00 |
| 203 | B:ASP | 203 | 40.77  | 0.00 | 0.00 |
| 204 | B:LYS | 204 | 103.91 | 0.00 | 0.00 |
| 205 | B:THR | 205 | 110.40 | 0.00 | 0.00 |
| 206 | B:VAL | 206 | 68.15  | 0.00 | 0.00 |
| 207 | B:GLU | 207 | 133.90 | 0.00 | 0.00 |
| 208 | B:HIS | 208 | 177.89 | 0.00 | 0.00 |
| 209 | B:LEU | 209 | 71.25  | 0.00 | 0.00 |
| 210 | B:PRO | 210 | 50.04  | 0.00 | 0.00 |
| 211 | B:THR | 211 | 29.12  | 0.00 | 0.00 |

|     |       |     |        |      |      |
|-----|-------|-----|--------|------|------|
| 212 | B:ALA | 212 | 0.00   | 0.00 | 0.00 |
| 213 | B:TRP | 213 | 18.24  | 0.00 | 0.00 |
| 214 | B:GLN | 214 | 28.24  | 0.00 | 0.00 |
| 215 | B:VAL | 215 | 3.13   | 0.00 | 0.00 |
| 216 | B:HIS | 216 | 89.31  | 0.00 | 0.00 |
| 217 | B:ARG | 217 | 87.77  | 0.00 | 0.00 |
| 218 | B:ASP | 218 | 79.23  | 0.00 | 0.00 |
| 219 | B:TRP | 219 | 85.95  | 0.00 | 0.00 |
| 220 | B:PHE | 220 | 0.94   | 0.00 | 0.00 |
| 221 | B:ASN | 221 | 54.50  | 0.00 | 0.00 |
| 222 | B:ASP | 222 | 114.50 | 0.00 | 0.00 |
| 223 | B:LEU | 223 | 40.18  | 0.00 | 0.00 |
| 224 | B:ALA | 224 | 71.61  | 0.00 | 0.00 |
| 225 | B:LEU | 225 | 21.89  | 0.00 | 0.00 |
| 226 | B:PRO | 226 | 4.68   | 0.00 | 0.00 |
| 227 | B:TRP | 227 | 55.04  | 0.00 | 0.00 |
| 228 | B:LYS | 228 | 27.66  | 0.00 | 0.00 |
| 229 | B:HIS | 229 | 106.09 | 0.00 | 0.00 |
| 230 | B:GLU | 230 | 123.89 | 0.00 | 0.00 |
| 231 | B:GLY | 231 | 75.70  | 0.00 | 0.00 |
| 232 | B:ALA | 232 | 49.67  | 0.00 | 0.00 |
| 233 | B:GLN | 233 | 156.83 | 0.00 | 0.00 |
| 234 | B:ASN | 234 | 69.01  | 0.00 | 0.00 |
| 235 | B:TRP | 235 | 34.05  | 0.00 | 0.00 |
| 236 | B:ASN | 236 | 60.76  | 0.00 | 0.00 |
| 237 | B:ASN | 237 | 68.72  | 0.00 | 0.00 |
| 238 | B:ALA | 238 | 15.18  | 0.00 | 0.00 |
| 239 | B:GLU | 239 | 120.70 | 0.00 | 0.00 |
| 240 | B:ARG | 240 | 102.53 | 0.00 | 0.00 |
| 241 | B:LEU | 241 | 6.84   | 0.00 | 0.00 |
| 242 | B:VAL | 242 | 4.07   | 0.00 | 0.00 |
| 243 | B:GLU | 243 | 99.22  | 0.00 | 0.00 |
| 244 | B:PHE | 244 | 34.93  | 0.00 | 0.00 |
| 245 | B:GLY | 245 | 16.83  | 0.00 | 0.00 |
| 246 | B:ALA | 246 | 91.45  | 0.00 | 0.00 |
| 247 | B:PRO | 247 | 32.82  | 0.00 | 0.00 |
| 248 | B:HIS | 248 | 122.22 | 0.00 | 0.00 |
| 249 | B:ALA | 249 | 27.13  | 0.00 | 0.00 |
| 250 | B:VAL | 250 | 76.20  | 0.00 | 0.00 |
| 251 | B:LYS | 251 | 131.22 | 0.00 | 0.00 |
| 252 | B:MET | 252 | 19.74  | 0.00 | 0.00 |
| 253 | B:ASP | 253 | 61.71  | 0.00 | 0.00 |
| 254 | B:VAL | 254 | 43.18  | 0.00 | 0.00 |
| 255 | B:TYR | 255 | 117.45 | 0.00 | 0.00 |
| 256 | B:ASN | 256 | 69.90  | 0.00 | 0.00 |
| 257 | B:LEU | 257 | 94.79  | 0.00 | 0.00 |
| 258 | B:GLY | 258 | 24.65  | 0.00 | 0.00 |
| 259 | B:ASP | 259 | 59.91  | 0.00 | 0.00 |
| 260 | B:GLN | 260 | 37.12  | 0.00 | 0.00 |
| 261 | B:THR | 261 | 34.99  | 0.00 | 0.00 |
| 262 | B:GLY | 262 | 55.92  | 0.00 | 0.00 |
| 263 | B:VAL | 263 | 100.92 | 0.00 | 0.00 |
| 264 | B:LEU | 264 | 14.32  | 0.00 | 0.00 |
| 265 | B:LEU | 265 | 53.67  | 0.00 | 0.00 |
| 266 | B:LYS | 266 | 161.26 | 0.00 | 0.00 |
| 267 | B:ALA | 267 | 64.99  | 0.00 | 0.00 |
| 268 | B:LEU | 268 | 5.89   | 0.00 | 0.00 |
| 269 | B:ALA | 269 | 87.04  | 0.00 | 0.00 |
| 270 | B:GLY | 270 | 76.19  | 0.00 | 0.00 |
| 271 | B:VAL | 271 | 42.49  | 0.00 | 0.00 |
| 272 | B:PRO | 272 | 68.06  | 0.00 | 0.00 |
| 273 | B:VAL | 273 | 75.39  | 0.00 | 0.00 |
| 274 | B:ALA | 274 | 1.15   | 0.00 | 0.00 |
| 275 | B:HIS | 275 | 73.72  | 0.00 | 0.00 |
| 276 | B:ILE | 276 | 12.58  | 0.00 | 0.00 |
| 277 | B:GLU | 277 | 104.42 | 0.00 | 0.00 |
| 278 | B:GLY | 278 | 51.76  | 0.00 | 0.00 |
| 279 | B:THR | 279 | 72.56  | 0.00 | 0.00 |
| 280 | B:LYS | 280 | 64.90  | 0.00 | 0.00 |

|     |       |     |        |      |      |
|-----|-------|-----|--------|------|------|
| 281 | B:TYR | 281 | 22.54  | 0.00 | 0.00 |
| 282 | B:HIS | 282 | 24.77  | 0.00 | 0.00 |
| 283 | B:LEU | 283 | 2.69   | 0.00 | 0.00 |
| 284 | B:LYS | 284 | 119.43 | 0.00 | 0.00 |
| 285 | B:SER | 285 | 52.89  | 0.00 | 0.00 |
| 286 | B:GLY | 286 | 15.48  | 0.00 | 0.00 |
| 287 | B:HIS | 287 | 28.81  | 0.00 | 0.00 |
| 288 | B:VAL | 288 | 1.84   | 0.00 | 0.00 |
| 289 | B:THR | 289 | 22.84  | 0.00 | 0.00 |
| 290 | B:CYS | 290 | 2.99   | 0.00 | 0.00 |
| 291 | B:GLU | 291 | 55.77  | 0.00 | 0.00 |
| 292 | B:VAL | 292 | 0.99   | 0.00 | 0.00 |
| 293 | B:GLY | 293 | 10.72  | 0.00 | 0.00 |
| 294 | B:LEU | 294 | 12.17  | 0.00 | 0.00 |
| 295 | B:GLU | 295 | 121.57 | 0.00 | 0.00 |
| 296 | B:LYS | 296 | 140.33 | 0.00 | 0.00 |
| 297 | B:LEU | 297 | 9.60   | 0.00 | 0.00 |
| 298 | B:LYS | 298 | 123.85 | 0.00 | 0.00 |
| 299 | B:MET | 299 | 48.56  | 0.00 | 0.00 |
| 300 | B:LYS | 300 | 56.61  | 0.00 | 0.00 |
| 301 | B:GLY | 301 | 15.32  | 0.00 | 0.00 |
| 302 | B:LEU | 302 | 97.49  | 0.00 | 0.00 |
| 303 | B:THR | 303 | 129.80 | 0.00 | 0.00 |
| 304 | B:TYR | 304 | 75.60  | 0.00 | 0.00 |
| 305 | B:THR | 305 | 103.57 | 0.00 | 0.00 |
| 306 | B:MET | 306 | 123.11 | 0.00 | 0.00 |
| 307 | B:CYS | 307 | 9.02   | 0.00 | 0.00 |
| 308 | B:ASP | 308 | 66.38  | 0.00 | 0.00 |
| 309 | B:LYS | 309 | 114.69 | 0.00 | 0.00 |
| 310 | B:THR | 310 | 93.77  | 0.00 | 0.00 |
| 311 | B:LYS | 311 | 91.38  | 0.00 | 0.00 |
| 312 | B:PHE | 312 | 11.54  | 0.00 | 0.00 |
| 313 | B:THR | 313 | 69.77  | 0.00 | 0.00 |
| 314 | B:TRP | 314 | 53.43  | 0.00 | 0.00 |
| 315 | B:LYS | 315 | 136.69 | 0.00 | 0.00 |
| 316 | B:ARG | 316 | 150.20 | 0.00 | 0.00 |
| 317 | B:ALA | 317 | 50.59  | 0.00 | 0.00 |
| 318 | B:PRO | 318 | 7.48   | 0.00 | 0.00 |
| 319 | B:THR | 319 | 72.06  | 0.00 | 0.00 |
| 320 | B:ASP | 320 | 66.32  | 0.00 | 0.00 |
| 321 | B:SER | 321 | 37.47  | 0.00 | 0.00 |
| 322 | B:GLY | 322 | 63.67  | 0.00 | 0.00 |
| 323 | B:HIS | 323 | 37.82  | 0.00 | 0.00 |
| 324 | B:ASP | 324 | 58.99  | 0.00 | 0.00 |
| 325 | B:THR | 325 | 2.57   | 0.00 | 0.00 |
| 326 | B:VAL | 326 | 1.18   | 0.00 | 0.00 |
| 327 | B:VAL | 327 | 30.97  | 0.00 | 0.00 |
| 328 | B:MET | 328 | 3.81   | 0.00 | 0.00 |
| 329 | B:GLU | 329 | 23.93  | 0.00 | 0.00 |
| 330 | B:VAL | 330 | 5.94   | 0.00 | 0.00 |
| 331 | B:THR | 331 | 59.84  | 0.00 | 0.00 |
| 332 | B:PHE | 332 | 17.44  | 0.00 | 0.00 |
| 333 | B:SER | 333 | 88.83  | 0.00 | 0.00 |
| 334 | B:GLY | 334 | 17.04  | 0.00 | 0.00 |
| 335 | B:THR | 335 | 116.38 | 0.00 | 0.00 |
| 336 | B:LYS | 336 | 81.15  | 0.00 | 0.00 |
| 337 | B:PRO | 337 | 64.97  | 0.00 | 0.00 |
| 338 | B:CYS | 338 | 4.68   | 0.00 | 0.00 |
| 339 | B:ARG | 339 | 76.69  | 0.00 | 0.00 |
| 340 | B:ILE | 340 | 6.74   | 0.00 | 0.00 |
| 341 | B:PRO | 341 | 32.53  | 0.00 | 0.00 |
| 342 | B:VAL | 342 | 17.49  | 0.00 | 0.00 |
| 343 | B:ARG | 343 | 86.65  | 0.00 | 0.00 |
| 344 | B:ALA | 344 | 0.00   | 0.00 | 0.00 |
| 345 | B:VAL | 345 | 15.86  | 0.00 | 0.00 |
| 346 | B:ALA | 346 | 27.11  | 0.00 | 0.00 |
| 347 | B:HIS | 347 | 144.76 | 0.00 | 0.00 |
| 348 | B:GLY | 348 | 74.77  | 0.00 | 0.00 |
| 349 | B:SER | 349 | 59.80  | 0.00 | 0.00 |

|     |       |     |   |        |       |       |
|-----|-------|-----|---|--------|-------|-------|
| 350 | B:PRO | 350 |   | 115.21 | 0.00  | 0.00  |
| 351 | B:ASP | 351 |   | 85.07  | 0.00  | 0.00  |
| 352 | B:VAL | 352 |   | 90.82  | 0.00  | 0.00  |
| 353 | B:ASN | 353 |   | 80.15  | 0.00  | 0.00  |
| 354 | B:VAL | 354 |   | 52.10  | 0.00  | 0.00  |
| 355 | B:ALA | 355 |   | 16.65  | 0.00  | 0.00  |
| 356 | B:MET | 356 |   | 134.44 | 0.00  | 0.00  |
| 357 | B:LEU | 357 |   | 59.91  | 0.00  | 0.00  |
| 358 | B:ILE | 358 |   | 25.89  | 0.00  | 0.00  |
| 359 | B:THR | 359 |   | 5.36   | 0.00  | 0.00  |
| 360 | B:PRO | 360 |   | 40.55  | 0.00  | 0.00  |
| 361 | B:ASN | 361 |   | 38.07  | 0.00  | 0.00  |
| 362 | B:PRO | 362 |   | 11.88  | 0.00  | 0.00  |
| 363 | B:THR | 363 |   | 16.12  | 0.00  | 0.00  |
| 364 | B:ILE | 364 |   | 10.74  | 0.00  | 0.00  |
| 365 | B:GLU | 365 |   | 45.26  | 0.00  | 0.00  |
| 366 | B:ASN | 366 |   | 112.77 | 0.00  | 0.00  |
| 367 | B:ASN | 367 |   | 161.27 | 0.00  | 0.00  |
| 368 | B:GLY | 368 |   | 29.38  | 0.00  | 0.00  |
| 369 | B:GLY | 369 |   | 30.86  | 0.00  | 0.00  |
| 370 | B:GLY | 370 |   | 2.16   | 0.00  | 0.00  |
| 371 | B:PHE | 371 |   | 17.00  | 0.00  | 0.00  |
| 372 | B:ILE | 372 |   | 0.50   | 0.00  | 0.00  |
| 373 | B:GLU | 373 |   | 0.99   | 0.00  | 0.00  |
| 374 | B:MET | 374 |   | 1.32   | 0.00  | 0.00  |
| 375 | B:GLN | 375 |   | 53.70  | 0.00  | 0.00  |
| 376 | B:LEU | 376 |   | 4.26   | 0.00  | 0.00  |
| 377 | B:PRO | 377 |   | 40.59  | 0.00  | 0.00  |
| 378 | B:PRO | 378 |   | 50.59  | 0.00  | 0.00  |
| 379 | B:GLY | 379 |   | 25.23  | 0.00  | 0.00  |
| 380 | B:ASP | 380 |   | 71.04  | 0.00  | 0.00  |
| 381 | B:ASN | 381 |   | 1.62   | 0.00  | 0.00  |
| 382 | B:ILE | 382 |   | 56.68  | 0.00  | 0.00  |
| 383 | B:ILE | 383 |   | 0.50   | 0.00  | 0.00  |
| 384 | B:TYR | 384 |   | 63.45  | 0.00  | 0.00  |
| 385 | B:VAL | 385 |   | 0.00   | 0.00  | 0.00  |
| 386 | B:GLY | 386 |   | 11.22  | 0.00  | 0.00  |
| 387 | B:GLU | 387 |   | 126.03 | 0.00  | 0.00  |
| 388 | B:LEU | 388 |   | 49.43  | 0.00  | 0.00  |
| 389 | B:SER | 389 |   | 49.28  | 0.00  | 0.00  |
| 390 | B:HIS | 390 |   | 61.92  | 0.00  | 0.00  |
| 391 | B:GLN | 391 |   | 127.30 | 0.00  | 0.00  |
| 392 | B:TRP | 392 |   | 36.38  | 0.00  | 0.00  |
| 393 | B:PHE | 393 |   | 135.35 | 0.00  | 0.00  |
| 394 | B:GLN | 394 |   | 10.28  | 0.00  | 0.00  |
| 395 | B:LYS | 395 |   | 133.81 | 0.00  | 0.00  |
| 396 | B:GLY | 396 |   | 61.47  | 0.00  | 0.00  |
| 397 | B:SER | 397 |   | 55.71  | 0.00  | 0.00  |
| 398 | B:SER | 398 |   | 70.64  | 0.00  | 0.00  |
| 399 | B:ILE | 399 |   | 138.48 | 0.00  | 0.00  |
| 400 | B:GLY | 400 |   | 36.06  | 0.00  | 0.00  |
| 401 | B:ARG | 401 |   | 60.11  | 0.00  | 0.00  |
| 402 | B:VAL | 402 |   | 91.08  | 19.66 | 0.30  |
| 403 | B:PHE | 403 |   | 138.16 | 0.00  | 0.00  |
| 404 | B:GLN | 404 |   | 84.90  | 0.00  | 0.00  |
| 405 | B:LYS | 405 |   | 143.70 | 23.46 | -0.09 |
| 406 | B:THR | 406 | H | 73.98  | 56.33 | 0.40  |
| 407 | B:LYS | 407 |   | 111.39 | 0.00  | 0.00  |
| 408 | B:LYS | 408 |   | 66.82  | 0.17  | 0.00  |
| 409 | B:GLY | 409 |   | 32.84  | 30.87 | 0.42  |
| 410 | B:ILE | 410 |   | 107.28 | 37.22 | 0.60  |
| 411 | B:GLU | 411 |   | 107.81 | 0.00  | 0.00  |
| 412 | B:ARG | 412 | H | 43.34  | 16.62 | -0.04 |
| 413 | B:LEU | 413 |   | 55.39  | 10.88 | 0.17  |
| 414 | B:THR | 414 |   | 66.49  | 0.00  | 0.00  |
| 415 | B:VAL | 415 |   | 98.46  | 0.00  | 0.00  |
| 416 | B:ILE | 416 |   | 17.51  | 0.00  | 0.00  |
| 417 | B:GLY | 417 |   | 19.64  | 0.00  | 0.00  |
| 418 | B:GLU | 418 |   | 59.53  | 0.00  | 0.00  |



|     |       |     |        |       |       |
|-----|-------|-----|--------|-------|-------|
| 419 | B:HIS | 419 | 45.77  | 0.00  | 0.00  |
| 420 | B:ALA | 420 | 14.57  | 11.25 | -0.03 |
| 421 | B:TRP | 421 | 90.12  | 39.82 | 0.52  |
| 422 | B:ASP | 422 | 27.28  | 0.00  | 0.00  |
| 423 | B:PHE | 423 | 39.69  | 32.90 | 0.10  |
| 424 | B:GLY | 424 | 30.50  | 0.78  | 0.01  |
| 425 | B:SER | 425 | 29.41  | 8.87  | 0.14  |
| 426 | B:ALA | 426 | 106.61 | 0.00  | 0.00  |
| 427 | B:GLY | 427 | 46.17  | 0.00  | 0.00  |
| 428 | B:GLY | 428 | 53.59  | 0.00  | 0.00  |
| 429 | B:PHE | 429 | 167.72 | 0.00  | 0.00  |
| 430 | B:LEU | 430 | 146.32 | 12.46 | 0.20  |
| 431 | B:SER | 431 | 14.03  | 1.51  | 0.02  |
| 432 | B:SER | 432 | 65.78  | 0.00  | 0.00  |
| 433 | B:ILE | 433 | 80.16  | 0.00  | 0.00  |
| 434 | B:GLY | 434 | 12.11  | 0.00  | 0.00  |
| 435 | B:LYS | 435 | 71.52  | 0.00  | 0.00  |
| 436 | B:ALA | 436 | 50.68  | 0.00  | 0.00  |
| 437 | B:VAL | 437 | 87.38  | 0.00  | 0.00  |
| 438 | B:HIS | 438 | 54.99  | 0.00  | 0.00  |
| 439 | B:THR | 439 | 64.18  | 0.00  | 0.00  |
| 440 | B:VAL | 440 | 103.08 | 0.00  | 0.00  |
| 441 | B:LEU | 441 | 84.63  | 0.00  | 0.00  |
| 442 | B:GLY | 442 | 27.86  | 0.00  | 0.00  |
| 443 | B:GLY | 443 | 39.09  | 0.00  | 0.00  |
| 444 | B:ALA | 444 | 57.91  | 0.00  | 0.00  |
| 445 | B:PHE | 445 | 40.43  | 0.00  | 0.00  |
| 446 | B:ASN | 446 | 101.94 | 0.00  | 0.00  |
| 447 | B:SER | 447 | 90.99  | 0.00  | 0.00  |
| 448 | B:ILE | 448 | 111.28 | 0.00  | 0.00  |
| 449 | B:PHE | 449 | 36.26  | 0.00  | 0.00  |
| 450 | B:GLY | 450 | 48.58  | 0.00  | 0.00  |
| 451 | B:GLY | 451 | 90.34  | 0.00  | 0.00  |
| 452 | B:VAL | 452 | 63.68  | 0.00  | 0.00  |
| 453 | B:GLY | 453 | 34.37  | 0.00  | 0.00  |
| 454 | B:PHE | 454 | 138.29 | 0.00  | 0.00  |
| 455 | B:LEU | 455 | 108.88 | 0.00  | 0.00  |
| 456 | B:PRO | 456 | 53.43  | 0.00  | 0.00  |
| 457 | B:LYS | 457 | 32.97  | 0.00  | 0.00  |
| 458 | B:LEU | 458 | 57.56  | 0.00  | 0.00  |
| 459 | B:LEU | 459 | 112.68 | 0.00  | 0.00  |
| 460 | B:LEU | 460 | 83.58  | 0.00  | 0.00  |
| 461 | B:GLY | 461 | 0.00   | 0.00  | 0.00  |
| 462 | B:VAL | 462 | 88.05  | 0.00  | 0.00  |
| 463 | B:ALA | 463 | 48.01  | 0.00  | 0.00  |
| 464 | B:LEU | 464 | 48.38  | 0.00  | 0.00  |
| 465 | B:ALA | 465 | 32.39  | 0.00  | 0.00  |
| 466 | B:TRP | 466 | 156.33 | 0.00  | 0.00  |
| 467 | B:LEU | 467 | 69.67  | 0.00  | 0.00  |
| 468 | B:GLY | 468 | 0.00   | 0.00  | 0.00  |
| 469 | B:LEU | 469 | 138.86 | 0.00  | 0.00  |
| 470 | B:ASN | 470 | 96.11  | 0.00  | 0.00  |
| 471 | B:MET | 471 | 45.09  | 0.00  | 0.00  |
| 472 | B:ARG | 472 | 213.35 | 0.00  | 0.00  |
| 473 | B:ASN | 473 | 52.02  | 0.00  | 0.00  |
| 474 | B:PRO | 474 | 109.58 | 0.00  | 0.00  |
| 475 | B:THR | 475 | 96.15  | 0.00  | 0.00  |
| 476 | B:MET | 476 | 90.31  | 0.00  | 0.00  |
| 477 | B:SER | 477 | 16.45  | 0.00  | 0.00  |
| 478 | B:MET | 478 | 127.22 | 0.00  | 0.00  |
| 479 | B:SER | 479 | 58.68  | 0.00  | 0.00  |
| 480 | B:PHE | 480 | 58.08  | 0.00  | 0.00  |
| 481 | B:LEU | 481 | 52.52  | 0.00  | 0.00  |
| 482 | B:LEU | 482 | 115.16 | 0.00  | 0.00  |
| 483 | B:ALA | 483 | 42.73  | 0.00  | 0.00  |
| 484 | B:GLY | 484 | 0.00   | 0.00  | 0.00  |
| 485 | B:GLY | 485 | 35.34  | 0.00  | 0.00  |
| 486 | B:LEU | 486 | 68.85  | 0.00  | 0.00  |
| 487 | B:VAL | 487 | 2.96   | 0.00  | 0.00  |

|     |       |     |        |      |      |
|-----|-------|-----|--------|------|------|
| 488 | B:LEU | 488 | 49.93  | 0.00 | 0.00 |
| 489 | B:ALA | 489 | 64.21  | 0.00 | 0.00 |
| 490 | B:MET | 490 | 63.51  | 0.00 | 0.00 |
| 491 | B:THR | 491 | 17.31  | 0.00 | 0.00 |
| 492 | B:LEU | 492 | 150.75 | 0.00 | 0.00 |
| 493 | B:GLY | 493 | 54.57  | 0.00 | 0.00 |
| 494 | B:VAL | 494 | 145.39 | 0.00 | 0.00 |

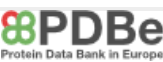

is a member of

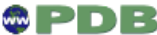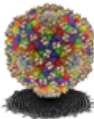

EMDDataBank  
 Unified Data Resource for 3DEM



Protein Data

PDBePISA

Bank

[pdbe.org/pisa](http://pdbe.org/pisa)

in Europe

Bringing Structure  
to Biology

[Feedback](#)

[Share](#)

[Services](#)

[Research](#)

[Training](#)

[About us](#)

[www.PDB](#)



EMDataBank

Unified Data Resource for 3DEM

## PISA Interface.

Session Map (id=179-P6-IE2)

[Start](#) [Interfaces](#) [Interface Search](#)  
[Monomers](#)  
[Assemblies](#)

interface # 32 in ourmodelfortest2.pdb crystal.

Space symmetry group: P 1

interface #32/96

[XML](#) [<<](#) [<](#) [>](#) [>>](#)

### Interface Summary

[XML](#)

View [structure 1](#) [interface](#) [structure 2](#)

Download

[structure 1](#) [interface](#) [structure 2](#)

This interface scored

**0.463**

in Complex Formation Significance Score (CSS).

CSS ranges from 0 to 1 as interface relevance to complex formation increases.

Achieved CSS implies that the interface plays an auxiliary role in complex formation

|                                   | <u>Structure 1</u> |        | <u>Structure 2</u> |        |
|-----------------------------------|--------------------|--------|--------------------|--------|
| <u>Selection range</u>            | [CPL]C:501         |        | C                  |        |
| <u>class</u>                      | Ligand             |        | Protein            |        |
| <u>symmetry operation</u>         | x,y,z              |        | x,y,z              |        |
| <u>symmetry ID</u>                | 1_555              |        | 0_555              |        |
| <u>Number of atoms</u>            |                    |        |                    |        |
| <u>interface</u>                  | 24                 | 85.7%  | 45                 | 1.2%   |
| <u>surface</u>                    | 27                 | 96.4%  | 2456               | 65.6%  |
| <u>total</u>                      | 28                 | 100.0% | 3746               | 100.0% |
| <u>Number of residues</u>         |                    |        |                    |        |
| <u>interface</u>                  | 1                  | 100.0% | 15                 | 3.0%   |
| <u>surface</u>                    | 1                  | 100.0% | 488                | 98.8%  |
| <u>total</u>                      | 1                  | 100.0% | 494                | 100.0% |
| <u>Solvent-accessible area, Å</u> |                    |        |                    |        |
| <u>interface</u>                  | 328.9              | 49.5%  | 281.5              | 1.0%   |
| <u>total</u>                      | 664.8              | 100.0% | 28155.3            | 100.0% |
| <u>Solvation energy, kcal/mol</u> |                    |        |                    |        |
| <u>isolated structure</u>         | 3.1                | 100.0% | -443.9             | 100.0% |
| <u>gain on complex formation</u>  | -1.1               | -36.2% | -2.0               | 0.5%   |
| <u>average gain</u>               | -2.8               | -88.9% | -1.7               | 0.4%   |
| <u>P-value</u>                    | 0.645              |        | 0.452              |        |

### Hydrogen bonds

[XML](#)

No disulfide bonds found

No covalent bonds found

No salt bridges found

| ## | - <u>Structure 1</u> | <u>Dist. [Å]</u> | - <u>Structure 2</u> |
|----|----------------------|------------------|----------------------|
| 1  | C:CPL 501[ 01P]      | 2.84             | C:ARG 412[ NH1]      |
| 2  | C:CPL 501[ 02P]      | 2.93             | C:ARG 412[ NH1]      |
| 3  | C:CPL 501[ 031]      | 2.84             | C:THR 406[ OG1]      |

### Interfacing residues (not a contact table)

[XML](#)

Display level: [Residues](#)

Inaccessible residues

HSDC

Residues making **Hydrogen/Disulphide bond**, **Salt bridge** or **Covalent link**

Solvent-accessible residues

Interfacing residues

**ASA** Accessible Surface Area, Å<sup>2</sup> **BSA** Buried Surface Area, Å<sup>2</sup> **Δ<sup>i</sup>G** Solvation energy effect, kcal/mol ||||| Buried area percentage, one bar per 10%

| ## | <u>Structure 1</u> | <u>HSDC</u> | <u>ASA</u> | <u>BSA</u> | <u>Δ<sup>i</sup>G</u> | ## | <u>Structure 2</u> | <u>HSDC</u> | <u>ASA</u> | <u>BSA</u> | <u>Δ<sup>i</sup>G</u> |
|----|--------------------|-------------|------------|------------|-----------------------|----|--------------------|-------------|------------|------------|-----------------------|
| 1  | C:CPL 501          | H           | 664.81     | 328.94     | 1.13                  | 1  | C:SER 1            |             | 10.29      | 0.00       | 0.00                  |
|    |                    |             |            |            |                       | 2  | C:ARG 2            |             | 74.07      | 0.00       | 0.00                  |
|    |                    |             |            |            |                       | 3  | C:CYS 3            |             | 0.00       | 0.00       | 0.00                  |

|    |       |    |        |      |       |
|----|-------|----|--------|------|-------|
| 4  | C:THR | 4  | 36.19  | 0.00 | 0.00  |
| 5  | C:HIS | 5  | 62.95  | 0.00 | 0.00  |
| 6  | C:LEU | 6  | 50.30  | 0.00 | 0.00  |
| 7  | C:GLU | 7  | 173.10 | 0.00 | 0.00  |
| 8  | C:ASN | 8  | 71.91  | 0.00 | 0.00  |
| 9  | C:ARG | 9  | 10.42  | 0.00 | 0.00  |
| 10 | C:ASP | 10 | 25.94  | 0.90 | -0.01 |
| 11 | C:PHE | 11 | 66.35  | 0.00 | 0.00  |
| 12 | C:VAL | 12 | 20.40  | 0.00 | 0.00  |
| 13 | C:THR | 13 | 102.91 | 0.00 | 0.00  |
| 14 | C:GLY | 14 | 17.76  | 0.00 | 0.00  |
| 15 | C:THR | 15 | 92.86  | 0.00 | 0.00  |
| 16 | C:GLN | 16 | 122.11 | 0.00 | 0.00  |
| 17 | C:GLY | 17 | 76.44  | 0.00 | 0.00  |
| 18 | C:THR | 18 | 56.60  | 0.00 | 0.00  |
| 19 | C:THR | 19 | 53.54  | 0.00 | 0.00  |
| 20 | C:ARG | 20 | 170.92 | 0.00 | 0.00  |
| 21 | C:VAL | 21 | 22.41  | 0.00 | 0.00  |
| 22 | C:THR | 22 | 20.38  | 0.00 | 0.00  |
| 23 | C:LEU | 23 | 1.84   | 0.00 | 0.00  |
| 24 | C:VAL | 24 | 1.72   | 0.00 | 0.00  |
| 25 | C:LEU | 25 | 3.52   | 0.00 | 0.00  |
| 26 | C:GLU | 26 | 48.04  | 0.00 | 0.00  |
| 27 | C:LEU | 27 | 31.70  | 0.00 | 0.00  |
| 28 | C:GLY | 28 | 56.10  | 0.00 | 0.00  |
| 29 | C:GLY | 29 | 8.90   | 0.00 | 0.00  |
| 30 | C:CYS | 30 | 6.26   | 0.00 | 0.00  |
| 31 | C:VAL | 31 | 7.87   | 0.00 | 0.00  |
| 32 | C:THR | 32 | 0.17   | 0.00 | 0.00  |
| 33 | C:ILE | 33 | 5.27   | 0.00 | 0.00  |
| 34 | C:THR | 34 | 34.29  | 0.00 | 0.00  |
| 35 | C:ALA | 35 | 9.84   | 0.00 | 0.00  |
| 36 | C:GLU | 36 | 147.14 | 0.00 | 0.00  |
| 37 | C:GLY | 37 | 36.26  | 0.00 | 0.00  |
| 38 | C:LYS | 38 | 55.88  | 0.00 | 0.00  |
| 39 | C:PRO | 39 | 3.54   | 0.00 | 0.00  |
| 40 | C:SER | 40 | 1.54   | 0.00 | 0.00  |
| 41 | C:MET | 41 | 1.00   | 0.00 | 0.00  |
| 42 | C:ASP | 42 | 0.00   | 0.00 | 0.00  |
| 43 | C:VAL | 43 | 2.17   | 0.00 | 0.00  |
| 44 | C:TRP | 44 | 8.77   | 0.00 | 0.00  |
| 45 | C:LEU | 45 | 3.36   | 0.00 | 0.00  |
| 46 | C:ASP | 46 | 59.00  | 0.00 | 0.00  |
| 47 | C:ALA | 47 | 16.81  | 0.00 | 0.00  |
| 48 | C:ILE | 48 | 0.34   | 0.00 | 0.00  |
| 49 | C:TYR | 49 | 41.84  | 0.00 | 0.00  |
| 50 | C:GLN | 50 | 4.34   | 0.00 | 0.00  |
| 51 | C:GLU | 51 | 91.85  | 0.00 | 0.00  |
| 52 | C:ASN | 52 | 102.69 | 0.00 | 0.00  |
| 53 | C:PRO | 53 | 13.15  | 0.00 | 0.00  |
| 54 | C:ALA | 54 | 54.43  | 0.00 | 0.00  |
| 55 | C:LYS | 55 | 112.86 | 0.00 | 0.00  |
| 56 | C:THR | 56 | 50.77  | 0.00 | 0.00  |
| 57 | C:ARG | 57 | 57.95  | 0.00 | 0.00  |
| 58 | C:GLU | 58 | 12.29  | 0.00 | 0.00  |
| 59 | C:TYR | 59 | 1.93   | 0.00 | 0.00  |
| 60 | C:CYS | 60 | 0.17   | 0.00 | 0.00  |
| 61 | C:LEU | 61 | 0.33   | 0.00 | 0.00  |
| 62 | C:HIS | 62 | 45.88  | 0.00 | 0.00  |
| 63 | C:ALA | 63 | 7.38   | 0.00 | 0.00  |
| 64 | C:LYS | 64 | 108.37 | 0.00 | 0.00  |
| 65 | C:LEU | 65 | 43.42  | 0.00 | 0.00  |
| 66 | C:SER | 66 | 55.99  | 0.00 | 0.00  |
| 67 | C:ASP | 67 | 99.59  | 0.00 | 0.00  |
| 68 | C:THR | 68 | 84.76  | 0.00 | 0.00  |
| 69 | C:LYS | 69 | 93.25  | 0.00 | 0.00  |
| 70 | C:VAL | 70 | 66.15  | 0.00 | 0.00  |
| 71 | C:ALA | 71 | 32.41  | 0.00 | 0.00  |
| 72 | C:ALA | 72 | 30.60  | 0.00 | 0.00  |

|     |       |     |        |      |      |
|-----|-------|-----|--------|------|------|
| 73  | C:ARG | 73  | 107.47 | 0.00 | 0.00 |
| 74  | C:CYS | 74  | 30.29  | 0.00 | 0.00 |
| 75  | C:PRO | 75  | 38.73  | 0.00 | 0.00 |
| 76  | C:THR | 76  | 94.73  | 0.00 | 0.00 |
| 77  | C:MET | 77  | 125.15 | 0.00 | 0.00 |
| 78  | C:GLY | 78  | 38.73  | 0.00 | 0.00 |
| 79  | C:PRO | 79  | 87.31  | 0.00 | 0.00 |
| 80  | C:ALA | 80  | 2.66   | 0.00 | 0.00 |
| 81  | C:THR | 81  | 95.74  | 0.00 | 0.00 |
| 82  | C:LEU | 82  | 33.34  | 0.00 | 0.00 |
| 83  | C:ALA | 83  | 81.53  | 0.00 | 0.00 |
| 84  | C:GLU | 84  | 32.25  | 0.00 | 0.00 |
| 85  | C:GLU | 85  | 50.27  | 0.00 | 0.00 |
| 86  | C:HIS | 86  | 168.30 | 0.00 | 0.00 |
| 87  | C:GLN | 87  | 126.91 | 0.00 | 0.00 |
| 88  | C:GLY | 88  | 49.47  | 0.00 | 0.00 |
| 89  | C:GLY | 89  | 22.15  | 0.00 | 0.00 |
| 90  | C:THR | 90  | 33.69  | 0.00 | 0.00 |
| 91  | C:VAL | 91  | 14.56  | 0.00 | 0.00 |
| 92  | C:CYS | 92  | 42.37  | 0.00 | 0.00 |
| 93  | C:LYS | 93  | 89.07  | 0.00 | 0.00 |
| 94  | C:ARG | 94  | 100.42 | 0.00 | 0.00 |
| 95  | C:ASP | 95  | 59.65  | 0.00 | 0.00 |
| 96  | C:GLN | 96  | 110.55 | 0.00 | 0.00 |
| 97  | C:SER | 97  | 3.53   | 0.00 | 0.00 |
| 98  | C:ASP | 98  | 97.06  | 0.00 | 0.00 |
| 99  | C:ARG | 99  | 31.02  | 0.00 | 0.00 |
| 100 | C:GLY | 100 | 3.68   | 0.00 | 0.00 |
| 101 | C:TRP | 101 | 185.19 | 0.00 | 0.00 |
| 102 | C:GLY | 102 | 69.86  | 0.00 | 0.00 |
| 103 | C:ASN | 103 | 51.54  | 0.00 | 0.00 |
| 104 | C:HIS | 104 | 174.45 | 0.00 | 0.00 |
| 105 | C:CYS | 105 | 10.24  | 0.00 | 0.00 |
| 106 | C:GLY | 106 | 62.13  | 0.00 | 0.00 |
| 107 | C:LEU | 107 | 94.61  | 0.00 | 0.00 |
| 108 | C:PHE | 108 | 142.39 | 0.00 | 0.00 |
| 109 | C:GLY | 109 | 33.05  | 0.00 | 0.00 |
| 110 | C:LYS | 110 | 125.61 | 0.00 | 0.00 |
| 111 | C:GLY | 111 | 6.72   | 0.00 | 0.00 |
| 112 | C:SER | 112 | 16.29  | 0.00 | 0.00 |
| 113 | C:ILE | 113 | 0.00   | 0.00 | 0.00 |
| 114 | C:VAL | 114 | 1.01   | 0.00 | 0.00 |
| 115 | C:ALA | 115 | 1.01   | 0.00 | 0.00 |
| 116 | C:CYS | 116 | 0.66   | 0.00 | 0.00 |
| 117 | C:VAL | 117 | 3.18   | 0.00 | 0.00 |
| 118 | C:LYS | 118 | 103.54 | 0.00 | 0.00 |
| 119 | C:ALA | 119 | 16.56  | 0.00 | 0.00 |
| 120 | C:ALA | 120 | 46.71  | 0.00 | 0.00 |
| 121 | C:CYS | 121 | 29.43  | 0.00 | 0.00 |
| 122 | C:GLU | 122 | 72.17  | 0.00 | 0.00 |
| 123 | C:ALA | 123 | 85.83  | 0.00 | 0.00 |
| 124 | C:LYS | 124 | 134.45 | 0.00 | 0.00 |
| 125 | C:LYS | 125 | 54.94  | 0.00 | 0.00 |
| 126 | C:LYS | 126 | 75.11  | 0.00 | 0.00 |
| 127 | C:ALA | 127 | 0.51   | 0.00 | 0.00 |
| 128 | C:THR | 128 | 21.19  | 0.00 | 0.00 |
| 129 | C:GLY | 129 | 0.00   | 0.00 | 0.00 |
| 130 | C:HIS | 130 | 5.13   | 0.00 | 0.00 |
| 131 | C:VAL | 131 | 42.27  | 0.00 | 0.00 |
| 132 | C:TYR | 132 | 16.66  | 0.00 | 0.00 |
| 133 | C:ASP | 133 | 56.11  | 0.00 | 0.00 |
| 134 | C:ALA | 134 | 44.73  | 0.00 | 0.00 |
| 135 | C:ASN | 135 | 112.13 | 0.00 | 0.00 |
| 136 | C:LYS | 136 | 127.79 | 0.00 | 0.00 |
| 137 | C:ILE | 137 | 0.51   | 0.00 | 0.00 |
| 138 | C:VAL | 138 | 27.33  | 0.00 | 0.00 |
| 139 | C:TYR | 139 | 1.24   | 0.00 | 0.00 |
| 140 | C:THR | 140 | 22.57  | 0.00 | 0.00 |
| 141 | C:VAL | 141 | 0.82   | 0.00 | 0.00 |

|     |       |     |        |      |      |
|-----|-------|-----|--------|------|------|
| 142 | C:LYS | 142 | 45.41  | 0.00 | 0.00 |
| 143 | C:VAL | 143 | 2.76   | 0.00 | 0.00 |
| 144 | C:GLU | 144 | 1.11   | 0.00 | 0.00 |
| 145 | C:PRO | 145 | 4.63   | 0.00 | 0.00 |
| 146 | C:HIS | 146 | 7.01   | 0.00 | 0.00 |
| 147 | C:THR | 147 | 55.75  | 0.00 | 0.00 |
| 148 | C:GLY | 148 | 15.03  | 0.00 | 0.00 |
| 149 | C:ASP | 149 | 55.31  | 0.00 | 0.00 |
| 150 | C:TYR | 150 | 78.29  | 0.00 | 0.00 |
| 151 | C:VAL | 151 | 41.66  | 0.00 | 0.00 |
| 152 | C:ALA | 152 | 60.84  | 0.00 | 0.00 |
| 153 | C:ALA | 153 | 86.84  | 0.00 | 0.00 |
| 154 | C:ASN | 154 | 143.30 | 0.00 | 0.00 |
| 155 | C:GLU | 155 | 90.84  | 0.00 | 0.00 |
| 156 | C:THR | 156 | 116.46 | 0.00 | 0.00 |
| 157 | C:HIS | 157 | 25.94  | 0.00 | 0.00 |
| 158 | C:SER | 158 | 112.66 | 0.00 | 0.00 |
| 159 | C:GLY | 159 | 19.92  | 0.00 | 0.00 |
| 160 | C:ARG | 160 | 71.26  | 0.00 | 0.00 |
| 161 | C:LYS | 161 | 78.14  | 0.00 | 0.00 |
| 162 | C:THR | 162 | 78.08  | 0.00 | 0.00 |
| 163 | C:ALA | 163 | 8.16   | 0.00 | 0.00 |
| 164 | C:SER | 164 | 76.70  | 0.00 | 0.00 |
| 165 | C:PHE | 165 | 2.49   | 0.00 | 0.00 |
| 166 | C:THR | 166 | 34.91  | 0.00 | 0.00 |
| 167 | C:VAL | 167 | 75.46  | 0.00 | 0.00 |
| 168 | C:SER | 168 | 102.15 | 0.00 | 0.00 |
| 169 | C:SER | 169 | 41.07  | 0.00 | 0.00 |
| 170 | C:GLU | 170 | 127.31 | 0.00 | 0.00 |
| 171 | C:LYS | 171 | 128.13 | 0.00 | 0.00 |
| 172 | C:THR | 172 | 48.75  | 0.00 | 0.00 |
| 173 | C:ILE | 173 | 100.28 | 0.00 | 0.00 |
| 174 | C:LEU | 174 | 17.98  | 0.00 | 0.00 |
| 175 | C:THR | 175 | 85.12  | 0.00 | 0.00 |
| 176 | C:MET | 176 | 9.50   | 0.00 | 0.00 |
| 177 | C:GLY | 177 | 60.59  | 0.00 | 0.00 |
| 178 | C:GLU | 178 | 114.47 | 0.00 | 0.00 |
| 179 | C:TYR | 179 | 21.75  | 0.00 | 0.00 |
| 180 | C:GLY | 180 | 11.21  | 0.00 | 0.00 |
| 181 | C:ASP | 181 | 45.69  | 0.00 | 0.00 |
| 182 | C:VAL | 182 | 1.96   | 0.00 | 0.00 |
| 183 | C:SER | 183 | 25.39  | 0.00 | 0.00 |
| 184 | C:LEU | 184 | 1.80   | 0.00 | 0.00 |
| 185 | C:LEU | 185 | 69.53  | 0.00 | 0.00 |
| 186 | C:CYS | 186 | 8.84   | 0.00 | 0.00 |
| 187 | C:ARG | 187 | 125.57 | 0.00 | 0.00 |
| 188 | C:VAL | 188 | 23.39  | 0.00 | 0.00 |
| 189 | C:ALA | 189 | 74.81  | 0.00 | 0.00 |
| 190 | C:SER | 190 | 28.61  | 0.00 | 0.00 |
| 191 | C:GLY | 191 | 14.11  | 0.00 | 0.00 |
| 192 | C:VAL | 192 | 27.81  | 0.00 | 0.00 |
| 193 | C:ASP | 193 | 87.85  | 0.00 | 0.00 |
| 194 | C:LEU | 194 | 23.57  | 0.00 | 0.00 |
| 195 | C:ALA | 195 | 67.56  | 0.00 | 0.00 |
| 196 | C:GLN | 196 | 67.55  | 0.00 | 0.00 |
| 197 | C:THR | 197 | 17.52  | 0.00 | 0.00 |
| 198 | C:VAL | 198 | 5.86   | 0.00 | 0.00 |
| 199 | C:ILE | 199 | 2.51   | 0.00 | 0.00 |
| 200 | C:LEU | 200 | 0.51   | 0.00 | 0.00 |
| 201 | C:GLU | 201 | 27.55  | 0.00 | 0.00 |
| 202 | C:LEU | 202 | 22.83  | 0.00 | 0.00 |
| 203 | C:ASP | 203 | 36.36  | 0.00 | 0.00 |
| 204 | C:LYS | 204 | 105.02 | 0.00 | 0.00 |
| 205 | C:THR | 205 | 105.48 | 0.00 | 0.00 |
| 206 | C:VAL | 206 | 65.05  | 0.00 | 0.00 |
| 207 | C:GLU | 207 | 142.94 | 0.00 | 0.00 |
| 208 | C:HIS | 208 | 168.31 | 0.00 | 0.00 |
| 209 | C:LEU | 209 | 71.14  | 0.00 | 0.00 |
| 210 | C:PRO | 210 | 52.54  | 0.00 | 0.00 |

|     |       |     |        |      |      |
|-----|-------|-----|--------|------|------|
| 211 | C:THR | 211 | 36.45  | 0.00 | 0.00 |
| 212 | C:ALA | 212 | 0.00   | 0.00 | 0.00 |
| 213 | C:TRP | 213 | 17.36  | 0.00 | 0.00 |
| 214 | C:GLN | 214 | 24.73  | 0.00 | 0.00 |
| 215 | C:VAL | 215 | 7.45   | 0.00 | 0.00 |
| 216 | C:HIS | 216 | 87.91  | 0.00 | 0.00 |
| 217 | C:ARG | 217 | 87.65  | 0.00 | 0.00 |
| 218 | C:ASP | 218 | 81.55  | 0.00 | 0.00 |
| 219 | C:TRP | 219 | 88.51  | 0.00 | 0.00 |
| 220 | C:PHE | 220 | 3.28   | 0.00 | 0.00 |
| 221 | C:ASN | 221 | 69.35  | 0.00 | 0.00 |
| 222 | C:ASP | 222 | 113.95 | 0.00 | 0.00 |
| 223 | C:LEU | 223 | 23.90  | 0.00 | 0.00 |
| 224 | C:ALA | 224 | 68.31  | 0.00 | 0.00 |
| 225 | C:LEU | 225 | 19.86  | 0.00 | 0.00 |
| 226 | C:PRO | 226 | 3.66   | 0.00 | 0.00 |
| 227 | C:TRP | 227 | 64.79  | 0.00 | 0.00 |
| 228 | C:LYS | 228 | 23.05  | 0.00 | 0.00 |
| 229 | C:HIS | 229 | 86.16  | 0.00 | 0.00 |
| 230 | C:GLU | 230 | 131.18 | 0.00 | 0.00 |
| 231 | C:GLY | 231 | 77.82  | 0.00 | 0.00 |
| 232 | C:ALA | 232 | 48.84  | 0.00 | 0.00 |
| 233 | C:GLN | 233 | 152.38 | 0.00 | 0.00 |
| 234 | C:ASN | 234 | 76.46  | 0.00 | 0.00 |
| 235 | C:TRP | 235 | 45.28  | 0.00 | 0.00 |
| 236 | C:ASN | 236 | 61.07  | 0.00 | 0.00 |
| 237 | C:ASN | 237 | 67.82  | 0.00 | 0.00 |
| 238 | C:ALA | 238 | 15.88  | 0.00 | 0.00 |
| 239 | C:GLU | 239 | 111.31 | 0.00 | 0.00 |
| 240 | C:ARG | 240 | 113.58 | 0.00 | 0.00 |
| 241 | C:LEU | 241 | 6.06   | 0.00 | 0.00 |
| 242 | C:VAL | 242 | 4.61   | 0.00 | 0.00 |
| 243 | C:GLU | 243 | 85.09  | 0.00 | 0.00 |
| 244 | C:PHE | 244 | 23.04  | 0.00 | 0.00 |
| 245 | C:GLY | 245 | 19.82  | 0.00 | 0.00 |
| 246 | C:ALA | 246 | 92.00  | 0.00 | 0.00 |
| 247 | C:PRO | 247 | 34.98  | 0.00 | 0.00 |
| 248 | C:HIS | 248 | 117.55 | 0.00 | 0.00 |
| 249 | C:ALA | 249 | 22.31  | 0.00 | 0.00 |
| 250 | C:VAL | 250 | 68.91  | 0.00 | 0.00 |
| 251 | C:LYS | 251 | 127.07 | 0.00 | 0.00 |
| 252 | C:MET | 252 | 19.93  | 0.00 | 0.00 |
| 253 | C:ASP | 253 | 67.40  | 0.00 | 0.00 |
| 254 | C:VAL | 254 | 40.04  | 0.00 | 0.00 |
| 255 | C:TYR | 255 | 113.32 | 0.00 | 0.00 |
| 256 | C:ASN | 256 | 67.09  | 0.00 | 0.00 |
| 257 | C:LEU | 257 | 104.87 | 0.00 | 0.00 |
| 258 | C:GLY | 258 | 19.80  | 0.00 | 0.00 |
| 259 | C:ASP | 259 | 73.79  | 0.00 | 0.00 |
| 260 | C:GLN | 260 | 36.21  | 0.00 | 0.00 |
| 261 | C:THR | 261 | 34.95  | 0.00 | 0.00 |
| 262 | C:GLY | 262 | 49.82  | 0.00 | 0.00 |
| 263 | C:VAL | 263 | 89.73  | 0.00 | 0.00 |
| 264 | C:LEU | 264 | 10.04  | 0.00 | 0.00 |
| 265 | C:LEU | 265 | 57.96  | 0.00 | 0.00 |
| 266 | C:LYS | 266 | 156.71 | 0.00 | 0.00 |
| 267 | C:ALA | 267 | 59.76  | 0.00 | 0.00 |
| 268 | C:LEU | 268 | 8.91   | 0.00 | 0.00 |
| 269 | C:ALA | 269 | 88.85  | 0.00 | 0.00 |
| 270 | C:GLY | 270 | 81.91  | 0.00 | 0.00 |
| 271 | C:VAL | 271 | 48.16  | 0.00 | 0.00 |
| 272 | C:PRO | 272 | 64.23  | 0.00 | 0.00 |
| 273 | C:VAL | 273 | 74.99  | 0.00 | 0.00 |
| 274 | C:ALA | 274 | 3.12   | 0.00 | 0.00 |
| 275 | C:HIS | 275 | 69.54  | 0.00 | 0.00 |
| 276 | C:ILE | 276 | 14.78  | 0.00 | 0.00 |
| 277 | C:GLU | 277 | 98.84  | 0.00 | 0.00 |
| 278 | C:GLY | 278 | 65.88  | 0.00 | 0.00 |
| 279 | C:THR | 279 | 69.43  | 0.00 | 0.00 |

|     |       |     |        |      |      |
|-----|-------|-----|--------|------|------|
| 280 | C:LYS | 280 | 71.79  | 0.00 | 0.00 |
| 281 | C:TYR | 281 | 19.37  | 0.00 | 0.00 |
| 282 | C:HIS | 282 | 23.38  | 0.00 | 0.00 |
| 283 | C:LEU | 283 | 1.97   | 0.00 | 0.00 |
| 284 | C:LYS | 284 | 109.81 | 0.00 | 0.00 |
| 285 | C:SER | 285 | 49.18  | 0.00 | 0.00 |
| 286 | C:GLY | 286 | 16.84  | 0.00 | 0.00 |
| 287 | C:HIS | 287 | 27.22  | 0.00 | 0.00 |
| 288 | C:VAL | 288 | 1.68   | 0.00 | 0.00 |
| 289 | C:THR | 289 | 4.50   | 0.00 | 0.00 |
| 290 | C:CYS | 290 | 2.16   | 0.00 | 0.00 |
| 291 | C:GLU | 291 | 74.55  | 0.00 | 0.00 |
| 292 | C:VAL | 292 | 2.50   | 0.00 | 0.00 |
| 293 | C:GLY | 293 | 14.29  | 0.00 | 0.00 |
| 294 | C:LEU | 294 | 11.78  | 0.00 | 0.00 |
| 295 | C:GLU | 295 | 92.54  | 0.00 | 0.00 |
| 296 | C:LYS | 296 | 167.24 | 0.00 | 0.00 |
| 297 | C:LEU | 297 | 9.49   | 0.00 | 0.00 |
| 298 | C:LYS | 298 | 124.88 | 0.00 | 0.00 |
| 299 | C:MET | 299 | 52.35  | 0.00 | 0.00 |
| 300 | C:LYS | 300 | 45.49  | 0.00 | 0.00 |
| 301 | C:GLY | 301 | 15.87  | 0.00 | 0.00 |
| 302 | C:LEU | 302 | 108.95 | 0.00 | 0.00 |
| 303 | C:THR | 303 | 135.04 | 0.00 | 0.00 |
| 304 | C:TYR | 304 | 71.88  | 0.00 | 0.00 |
| 305 | C:THR | 305 | 99.62  | 0.00 | 0.00 |
| 306 | C:MET | 306 | 110.71 | 0.00 | 0.00 |
| 307 | C:CYS | 307 | 13.66  | 0.00 | 0.00 |
| 308 | C:ASP | 308 | 64.31  | 0.00 | 0.00 |
| 309 | C:LYS | 309 | 116.23 | 0.00 | 0.00 |
| 310 | C:THR | 310 | 84.41  | 0.00 | 0.00 |
| 311 | C:LYS | 311 | 93.37  | 0.00 | 0.00 |
| 312 | C:PHE | 312 | 15.13  | 0.00 | 0.00 |
| 313 | C:THR | 313 | 68.55  | 0.00 | 0.00 |
| 314 | C:TRP | 314 | 55.55  | 0.00 | 0.00 |
| 315 | C:LYS | 315 | 136.35 | 0.00 | 0.00 |
| 316 | C:ARG | 316 | 161.64 | 0.00 | 0.00 |
| 317 | C:ALA | 317 | 53.45  | 0.00 | 0.00 |
| 318 | C:PRO | 318 | 11.04  | 0.00 | 0.00 |
| 319 | C:THR | 319 | 77.83  | 0.00 | 0.00 |
| 320 | C:ASP | 320 | 81.33  | 0.00 | 0.00 |
| 321 | C:SER | 321 | 18.45  | 0.00 | 0.00 |
| 322 | C:GLY | 322 | 75.56  | 0.00 | 0.00 |
| 323 | C:HIS | 323 | 38.70  | 0.00 | 0.00 |
| 324 | C:ASP | 324 | 46.35  | 0.00 | 0.00 |
| 325 | C:THR | 325 | 3.03   | 0.00 | 0.00 |
| 326 | C:VAL | 326 | 1.01   | 0.00 | 0.00 |
| 327 | C:VAL | 327 | 25.41  | 0.00 | 0.00 |
| 328 | C:MET | 328 | 1.96   | 0.00 | 0.00 |
| 329 | C:GLU | 329 | 30.06  | 0.00 | 0.00 |
| 330 | C:VAL | 330 | 2.66   | 0.00 | 0.00 |
| 331 | C:THR | 331 | 55.87  | 0.00 | 0.00 |
| 332 | C:PHE | 332 | 7.65   | 0.00 | 0.00 |
| 333 | C:SER | 333 | 78.00  | 0.00 | 0.00 |
| 334 | C:GLY | 334 | 20.44  | 0.00 | 0.00 |
| 335 | C:THR | 335 | 119.67 | 0.00 | 0.00 |
| 336 | C:LYS | 336 | 83.73  | 0.00 | 0.00 |
| 337 | C:PRO | 337 | 57.90  | 0.00 | 0.00 |
| 338 | C:CYS | 338 | 2.51   | 0.00 | 0.00 |
| 339 | C:ARG | 339 | 67.72  | 0.00 | 0.00 |
| 340 | C:ILE | 340 | 13.20  | 0.00 | 0.00 |
| 341 | C:PRO | 341 | 28.55  | 0.00 | 0.00 |
| 342 | C:VAL | 342 | 22.03  | 0.00 | 0.00 |
| 343 | C:ARG | 343 | 118.13 | 0.00 | 0.00 |
| 344 | C:ALA | 344 | 1.05   | 0.00 | 0.00 |
| 345 | C:VAL | 345 | 15.06  | 0.00 | 0.00 |
| 346 | C:ALA | 346 | 34.04  | 0.00 | 0.00 |
| 347 | C:HIS | 347 | 118.04 | 0.00 | 0.00 |
| 348 | C:GLY | 348 | 77.71  | 0.00 | 0.00 |



|     |       |     |        |       |       |
|-----|-------|-----|--------|-------|-------|
| 349 | C:SER | 349 | 52.77  | 0.00  | 0.00  |
| 350 | C:PRO | 350 | 121.49 | 0.00  | 0.00  |
| 351 | C:ASP | 351 | 115.55 | 0.00  | 0.00  |
| 352 | C:VAL | 352 | 99.12  | 0.00  | 0.00  |
| 353 | C:ASN | 353 | 92.20  | 0.00  | 0.00  |
| 354 | C:VAL | 354 | 37.86  | 0.00  | 0.00  |
| 355 | C:ALA | 355 | 14.23  | 0.00  | 0.00  |
| 356 | C:MET | 356 | 125.22 | 0.00  | 0.00  |
| 357 | C:LEU | 357 | 65.02  | 0.00  | 0.00  |
| 358 | C:ILE | 358 | 21.06  | 0.00  | 0.00  |
| 359 | C:THR | 359 | 9.45   | 0.00  | 0.00  |
| 360 | C:PRO | 360 | 50.04  | 0.00  | 0.00  |
| 361 | C:ASN | 361 | 49.59  | 0.00  | 0.00  |
| 362 | C:PRO | 362 | 16.05  | 0.00  | 0.00  |
| 363 | C:THR | 363 | 28.50  | 0.00  | 0.00  |
| 364 | C:ILE | 364 | 6.38   | 0.00  | 0.00  |
| 365 | C:GLU | 365 | 47.42  | 0.00  | 0.00  |
| 366 | C:ASN | 366 | 118.66 | 0.00  | 0.00  |
| 367 | C:ASN | 367 | 139.30 | 0.00  | 0.00  |
| 368 | C:GLY | 368 | 35.01  | 0.00  | 0.00  |
| 369 | C:GLY | 369 | 36.90  | 0.00  | 0.00  |
| 370 | C:GLY | 370 | 4.35   | 0.00  | 0.00  |
| 371 | C:PHE | 371 | 13.14  | 0.00  | 0.00  |
| 372 | C:ILE | 372 | 0.49   | 0.00  | 0.00  |
| 373 | C:GLU | 373 | 0.83   | 0.00  | 0.00  |
| 374 | C:MET | 374 | 0.00   | 0.00  | 0.00  |
| 375 | C:GLN | 375 | 59.93  | 0.00  | 0.00  |
| 376 | C:LEU | 376 | 5.25   | 0.00  | 0.00  |
| 377 | C:PRO | 377 | 46.71  | 0.00  | 0.00  |
| 378 | C:PRO | 378 | 53.28  | 0.00  | 0.00  |
| 379 | C:GLY | 379 | 23.97  | 0.00  | 0.00  |
| 380 | C:ASP | 380 | 66.12  | 0.00  | 0.00  |
| 381 | C:ASN | 381 | 2.04   | 0.00  | 0.00  |
| 382 | C:ILE | 382 | 33.67  | 0.00  | 0.00  |
| 383 | C:ILE | 383 | 0.12   | 0.00  | 0.00  |
| 384 | C:TYR | 384 | 55.02  | 0.00  | 0.00  |
| 385 | C:VAL | 385 | 0.15   | 0.00  | 0.00  |
| 386 | C:GLY | 386 | 21.00  | 0.00  | 0.00  |
| 387 | C:GLU | 387 | 113.88 | 0.00  | 0.00  |
| 388 | C:LEU | 388 | 39.42  | 0.00  | 0.00  |
| 389 | C:SER | 389 | 51.25  | 0.00  | 0.00  |
| 390 | C:HIS | 390 | 59.87  | 0.00  | 0.00  |
| 391 | C:GLN | 391 | 106.66 | 0.00  | 0.00  |
| 392 | C:TRP | 392 | 38.31  | 0.00  | 0.00  |
| 393 | C:PHE | 393 | 136.80 | 0.00  | 0.00  |
| 394 | C:GLN | 394 | 12.91  | 0.00  | 0.00  |
| 395 | C:LYS | 395 | 152.01 | 0.00  | 0.00  |
| 396 | C:GLY | 396 | 65.42  | 0.00  | 0.00  |
| 397 | C:SER | 397 | 51.66  | 0.00  | 0.00  |
| 398 | C:SER | 398 | 72.56  | 0.00  | 0.00  |
| 399 | C:ILE | 399 | 141.96 | 0.00  | 0.00  |
| 400 | C:GLY | 400 | 32.78  | 0.00  | 0.00  |
| 401 | C:ARG | 401 | 54.48  | 0.00  | 0.00  |
| 402 | C:VAL | 402 | 101.34 | 16.10 | 0.25  |
| 403 | C:PHE | 403 | 126.89 | 0.00  | 0.00  |
| 404 | C:GLN | 404 | 112.30 | 0.00  | 0.00  |
| 405 | C:LYS | 405 | 152.17 | 17.47 | 0.13  |
| 406 | C:THR | 406 | 74.93  | 43.40 | 0.34  |
| 407 | C:LYS | 407 | 117.54 | 0.00  | 0.00  |
| 408 | C:LYS | 408 | 69.45  | 0.00  | 0.00  |
| 409 | C:GLY | 409 | 30.14  | 28.03 | 0.41  |
| 410 | C:ILE | 410 | 105.16 | 38.56 | 0.62  |
| 411 | C:GLU | 411 | 109.48 | 0.00  | 0.00  |
| 412 | C:ARG | 412 | 45.73  | 23.32 | -0.65 |
| 413 | C:LEU | 413 | 55.54  | 12.21 | 0.20  |
| 414 | C:THR | 414 | 65.22  | 0.00  | 0.00  |
| 415 | C:VAL | 415 | 108.39 | 0.00  | 0.00  |
| 416 | C:ILE | 416 | 20.10  | 0.00  | 0.00  |
| 417 | C:GLY | 417 | 19.39  | 0.00  | 0.00  |

|     |       |     |        |       |       |
|-----|-------|-----|--------|-------|-------|
| 418 | C:GLU | 418 | 62.99  | 0.00  | 0.00  |
| 419 | C:HIS | 419 | 43.24  | 0.00  | 0.00  |
| 420 | C:ALA | 420 | 18.12  | 10.57 | -0.09 |
| 421 | C:TRP | 421 | 80.05  | 40.61 | 0.54  |
| 422 | C:ASP | 422 | 19.42  | 0.00  | 0.00  |
| 423 | C:PHE | 423 | 37.05  | 28.60 | -0.02 |
| 424 | C:GLY | 424 | 35.06  | 1.61  | 0.03  |
| 425 | C:SER | 425 | 22.09  | 3.19  | 0.05  |
| 426 | C:ALA | 426 | 97.96  | 0.00  | 0.00  |
| 427 | C:GLY | 427 | 56.18  | 0.00  | 0.00  |
| 428 | C:GLY | 428 | 51.37  | 0.00  | 0.00  |
| 429 | C:PHE | 429 | 173.97 | 0.00  | 0.00  |
| 430 | C:LEU | 430 | 144.44 | 7.63  | 0.12  |
| 431 | C:SER | 431 | 23.85  | 9.33  | 0.14  |
| 432 | C:SER | 432 | 67.42  | 0.00  | 0.00  |
| 433 | C:ILE | 433 | 97.56  | 0.00  | 0.00  |
| 434 | C:GLY | 434 | 11.30  | 0.00  | 0.00  |
| 435 | C:LYS | 435 | 79.81  | 0.00  | 0.00  |
| 436 | C:ALA | 436 | 55.76  | 0.00  | 0.00  |
| 437 | C:VAL | 437 | 75.09  | 0.00  | 0.00  |
| 438 | C:HIS | 438 | 54.99  | 0.00  | 0.00  |
| 439 | C:THR | 439 | 63.28  | 0.00  | 0.00  |
| 440 | C:VAL | 440 | 99.94  | 0.00  | 0.00  |
| 441 | C:LEU | 441 | 112.27 | 0.00  | 0.00  |
| 442 | C:GLY | 442 | 25.14  | 0.00  | 0.00  |
| 443 | C:GLY | 443 | 38.43  | 0.00  | 0.00  |
| 444 | C:ALA | 444 | 55.78  | 0.00  | 0.00  |
| 445 | C:PHE | 445 | 50.20  | 0.00  | 0.00  |
| 446 | C:ASN | 446 | 97.77  | 0.00  | 0.00  |
| 447 | C:SER | 447 | 97.70  | 0.00  | 0.00  |
| 448 | C:ILE | 448 | 125.16 | 0.00  | 0.00  |
| 449 | C:PHE | 449 | 31.61  | 0.00  | 0.00  |
| 450 | C:GLY | 450 | 44.24  | 0.00  | 0.00  |
| 451 | C:GLY | 451 | 91.86  | 0.00  | 0.00  |
| 452 | C:VAL | 452 | 60.33  | 0.00  | 0.00  |
| 453 | C:GLY | 453 | 37.75  | 0.00  | 0.00  |
| 454 | C:PHE | 454 | 151.43 | 0.00  | 0.00  |
| 455 | C:LEU | 455 | 106.10 | 0.00  | 0.00  |
| 456 | C:PRO | 456 | 58.09  | 0.00  | 0.00  |
| 457 | C:LYS | 457 | 35.80  | 0.00  | 0.00  |
| 458 | C:LEU | 458 | 83.72  | 0.00  | 0.00  |
| 459 | C:LEU | 459 | 111.54 | 0.00  | 0.00  |
| 460 | C:LEU | 460 | 85.99  | 0.00  | 0.00  |
| 461 | C:GLY | 461 | 0.24   | 0.00  | 0.00  |
| 462 | C:VAL | 462 | 74.47  | 0.00  | 0.00  |
| 463 | C:ALA | 463 | 46.95  | 0.00  | 0.00  |
| 464 | C:LEU | 464 | 51.21  | 0.00  | 0.00  |
| 465 | C:ALA | 465 | 25.77  | 0.00  | 0.00  |
| 466 | C:TRP | 466 | 163.18 | 0.00  | 0.00  |
| 467 | C:LEU | 467 | 81.75  | 0.00  | 0.00  |
| 468 | C:GLY | 468 | 1.79   | 0.00  | 0.00  |
| 469 | C:LEU | 469 | 129.47 | 0.00  | 0.00  |
| 470 | C:ASN | 470 | 93.08  | 0.00  | 0.00  |
| 471 | C:MET | 471 | 49.84  | 0.00  | 0.00  |
| 472 | C:ARG | 472 | 204.38 | 0.00  | 0.00  |
| 473 | C:ASN | 473 | 149.43 | 0.00  | 0.00  |
| 474 | C:PRO | 474 | 64.87  | 0.00  | 0.00  |
| 475 | C:THR | 475 | 119.08 | 0.00  | 0.00  |
| 476 | C:MET | 476 | 111.99 | 0.00  | 0.00  |
| 477 | C:SER | 477 | 25.89  | 0.00  | 0.00  |
| 478 | C:MET | 478 | 126.87 | 0.00  | 0.00  |
| 479 | C:SER | 479 | 63.70  | 0.00  | 0.00  |
| 480 | C:PHE | 480 | 60.04  | 0.00  | 0.00  |
| 481 | C:LEU | 481 | 68.06  | 0.00  | 0.00  |
| 482 | C:LEU | 482 | 92.54  | 0.00  | 0.00  |
| 483 | C:ALA | 483 | 46.83  | 0.00  | 0.00  |
| 484 | C:GLY | 484 | 0.16   | 0.00  | 0.00  |
| 485 | C:GLY | 485 | 34.52  | 0.00  | 0.00  |
| 486 | C:LEU | 486 | 107.71 | 0.00  | 0.00  |

|     |       |     |        |      |      |
|-----|-------|-----|--------|------|------|
| 487 | C:VAL | 487 | 9.62   | 0.00 | 0.00 |
| 488 | C:LEU | 488 | 53.04  | 0.00 | 0.00 |
| 489 | C:ALA | 489 | 57.92  | 0.00 | 0.00 |
| 490 | C:MET | 490 | 97.66  | 0.00 | 0.00 |
| 491 | C:THR | 491 | 27.49  | 0.00 | 0.00 |
| 492 | C:LEU | 492 | 140.64 | 0.00 | 0.00 |
| 493 | C:GLY | 493 | 67.87  | 0.00 | 0.00 |
| 494 | C:VAL | 494 | 137.40 | 0.00 | 0.00 |

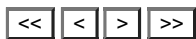

PDBe PISA v1.52 [20/10/2014]

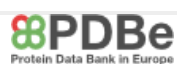

is a member of

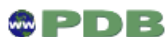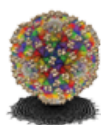

**EMDataBank**  
Unified Data Resource for 3DEM

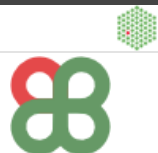

Protein Data

PDBePISA

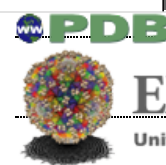

Services

Research

Training

About us

Bank

[pdbe.org/pisa](http://pdbe.org/pisa)

in Europe

Bringing Structure  
to Biology

Feedback

Share

## PISA Interface.

Session Map (id=179-P6-IE2)

|       |            |                  |
|-------|------------|------------------|
| Start | Interfaces | Interface Search |
| -     | Monomers   | -                |
| -     | Assemblies | -                |

interface # 23 in ourmodelfortest2.pdb crystal.

Space symmetry group: P 1

interface #23/96

[XML](#) [<<](#) [<](#) [>](#) [>>](#)

### Interface Summary

[XML](#)

View [structure 1](#) [interface](#) [structure 2](#)

Download

[structure 1](#) [interface](#) [structure 2](#)

This interface scored

**0.590**

in Complex Formation Significance Score (CSS).

CSS ranges from 0 to 1 as interface relevance to complex formation increases.

Achieved CSS implies that the interface plays an essential role in complex formation

|                                   | Structure 1 |         | Structure 2 |        |
|-----------------------------------|-------------|---------|-------------|--------|
| <u>Selection range</u>            | [CPL]A:500  |         | A           |        |
| class                             | Ligand      |         | Protein     |        |
| symmetry operation                | x,y,z       |         | x,y,z       |        |
| symmetry ID                       | 1_555       |         | 0_555       |        |
| <u>Number of atoms</u>            |             |         |             |        |
| interface                         | 27          | 96.4%   | 48          | 1.3%   |
| surface                           | 27          | 96.4%   | 2439        | 65.1%  |
| total                             | 28          | 100.0%  | 3746        | 100.0% |
| <u>Number of residues</u>         |             |         |             |        |
| interface                         | 1           | 100.0%  | 18          | 3.6%   |
| surface                           | 1           | 100.0%  | 481         | 97.4%  |
| total                             | 1           | 100.0%  | 494         | 100.0% |
| <u>Solvent-accessible area, Å</u> |             |         |             |        |
| interface                         | 381.8       | 56.4%   | 344.2       | 1.2%   |
| total                             | 676.9       | 100.0%  | 27709.2     | 100.0% |
| <u>Solvation energy, kcal/mol</u> |             |         |             |        |
| isolated structure                | 3.0         | 100.0%  | -444.3      | 100.0% |
| gain on complex formation         | -3.1        | -102.1% | -4.1        | 0.9%   |
| average gain                      | -3.0        | -100.0% | -1.8        | 0.4%   |
| P-value                           | 0.499       |         | 0.157       |        |

### Hydrogen bonds

[XML](#)

No disulfide bonds found

| ## | - Structure 1   | Dist. [Å] | - Structure 2   |
|----|-----------------|-----------|-----------------|
| 1  | A:CPL 500[ O1P] | 3.05      | A:HIS 438[ NE2] |

No covalent bonds found

No salt bridges found

### Interfacing residues (not a contact table)

[XML](#)

Display level: [Residues](#)

Inaccessible residues

HSDC

Residues making **Hydrogen/Disulphide bond**, **Salt bridge** or **Covalent link**

Solvent-accessible residues

Interfacing residues

**ASA** Accessible Surface Area, Å<sup>2</sup> **BSA** Buried Surface Area, Å<sup>2</sup> **Δ<sup>i</sup>G** Solvation energy effect, kcal/mol ||||| Buried area percentage, one bar per 10%

| ## | Structure 1 | HSDC | ASA    | BSA    | Δ <sup>i</sup> G | ##   | Structure 2 | HSDC  | ASA   | BSA  | Δ <sup>i</sup> G |
|----|-------------|------|--------|--------|------------------|------|-------------|-------|-------|------|------------------|
| 1  | A:CPL 500   | H    | 676.90 | 381.75 |                  | 3.09 | 1           | A:SER | 4.04  | 0.00 | 0.00             |
|    |             |      |        |        |                  |      | 2           | A:ARG | 66.31 | 0.00 | 0.00             |
|    |             |      |        |        |                  |      | 3           | A:CYS | 0.17  | 0.00 | 0.00             |
|    |             |      |        |        |                  |      | 4           | A:THR | 31.87 | 0.00 | 0.00             |
|    |             |      |        |        |                  |      | 5           | A:HIS | 59.60 | 0.00 | 0.00             |
|    |             |      |        |        |                  |      | 6           | A:LEU | 64.18 | 0.00 | 0.00             |

|    |       |    |        |      |      |
|----|-------|----|--------|------|------|
| 7  | A:GLU | 7  | 147.68 | 0.00 | 0.00 |
| 8  | A:ASN | 8  | 65.13  | 0.00 | 0.00 |
| 9  | A:ARG | 9  | 9.03   | 0.00 | 0.00 |
| 10 | A:ASP | 10 | 20.91  | 0.00 | 0.00 |
| 11 | A:PHE | 11 | 87.35  | 0.00 | 0.00 |
| 12 | A:VAL | 12 | 14.77  | 0.00 | 0.00 |
| 13 | A:THR | 13 | 105.26 | 0.00 | 0.00 |
| 14 | A:GLY | 14 | 18.72  | 0.00 | 0.00 |
| 15 | A:THR | 15 | 82.08  | 0.00 | 0.00 |
| 16 | A:GLN | 16 | 114.48 | 0.00 | 0.00 |
| 17 | A:GLY | 17 | 69.50  | 0.00 | 0.00 |
| 18 | A:THR | 18 | 58.84  | 0.00 | 0.00 |
| 19 | A:THR | 19 | 66.09  | 0.00 | 0.00 |
| 20 | A:ARG | 20 | 143.84 | 0.00 | 0.00 |
| 21 | A:VAL | 21 | 18.47  | 0.00 | 0.00 |
| 22 | A:THR | 22 | 35.53  | 0.00 | 0.00 |
| 23 | A:LEU | 23 | 2.32   | 0.00 | 0.00 |
| 24 | A:VAL | 24 | 4.95   | 0.00 | 0.00 |
| 25 | A:LEU | 25 | 4.35   | 0.00 | 0.00 |
| 26 | A:GLU | 26 | 35.93  | 0.00 | 0.00 |
| 27 | A:LEU | 27 | 34.77  | 0.00 | 0.00 |
| 28 | A:GLY | 28 | 58.11  | 0.00 | 0.00 |
| 29 | A:GLY | 29 | 8.75   | 0.00 | 0.00 |
| 30 | A:CYS | 30 | 5.10   | 0.00 | 0.00 |
| 31 | A:VAL | 31 | 5.69   | 0.00 | 0.00 |
| 32 | A:THR | 32 | 0.00   | 0.00 | 0.00 |
| 33 | A:ILE | 33 | 3.25   | 0.00 | 0.00 |
| 34 | A:THR | 34 | 27.47  | 0.00 | 0.00 |
| 35 | A:ALA | 35 | 20.61  | 0.00 | 0.00 |
| 36 | A:GLU | 36 | 123.01 | 0.00 | 0.00 |
| 37 | A:GLY | 37 | 35.12  | 0.00 | 0.00 |
| 38 | A:LYS | 38 | 52.27  | 0.00 | 0.00 |
| 39 | A:PRO | 39 | 14.13  | 0.00 | 0.00 |
| 40 | A:SER | 40 | 2.54   | 0.00 | 0.00 |
| 41 | A:MET | 41 | 1.17   | 0.00 | 0.00 |
| 42 | A:ASP | 42 | 0.00   | 0.00 | 0.00 |
| 43 | A:VAL | 43 | 0.50   | 0.00 | 0.00 |
| 44 | A:TRP | 44 | 10.10  | 0.00 | 0.00 |
| 45 | A:LEU | 45 | 4.92   | 0.00 | 0.00 |
| 46 | A:ASP | 46 | 64.19  | 0.00 | 0.00 |
| 47 | A:ALA | 47 | 15.55  | 0.00 | 0.00 |
| 48 | A:ILE | 48 | 0.00   | 0.00 | 0.00 |
| 49 | A:TYR | 49 | 45.43  | 0.00 | 0.00 |
| 50 | A:GLN | 50 | 4.00   | 0.00 | 0.00 |
| 51 | A:GLU | 51 | 95.58  | 0.00 | 0.00 |
| 52 | A:ASN | 52 | 104.84 | 0.00 | 0.00 |
| 53 | A:PRO | 53 | 14.62  | 0.00 | 0.00 |
| 54 | A:ALA | 54 | 59.76  | 0.00 | 0.00 |
| 55 | A:LYS | 55 | 99.24  | 0.00 | 0.00 |
| 56 | A:THR | 56 | 42.62  | 0.00 | 0.00 |
| 57 | A:ARG | 57 | 49.14  | 0.00 | 0.00 |
| 58 | A:GLU | 58 | 11.02  | 0.00 | 0.00 |
| 59 | A:TYR | 59 | 0.81   | 0.00 | 0.00 |
| 60 | A:CYS | 60 | 2.98   | 0.00 | 0.00 |
| 61 | A:LEU | 61 | 3.01   | 0.00 | 0.00 |
| 62 | A:HIS | 62 | 41.85  | 0.00 | 0.00 |
| 63 | A:ALA | 63 | 8.87   | 0.00 | 0.00 |
| 64 | A:LYS | 64 | 122.74 | 0.00 | 0.00 |
| 65 | A:LEU | 65 | 46.31  | 0.00 | 0.00 |
| 66 | A:SER | 66 | 57.05  | 0.00 | 0.00 |
| 67 | A:ASP | 67 | 93.81  | 0.00 | 0.00 |
| 68 | A:THR | 68 | 76.71  | 0.00 | 0.00 |
| 69 | A:LYS | 69 | 91.78  | 0.00 | 0.00 |
| 70 | A:VAL | 70 | 60.42  | 0.00 | 0.00 |
| 71 | A:ALA | 71 | 30.84  | 0.00 | 0.00 |
| 72 | A:ALA | 72 | 31.66  | 0.00 | 0.00 |
| 73 | A:ARG | 73 | 111.22 | 0.00 | 0.00 |
| 74 | A:CYS | 74 | 35.06  | 0.00 | 0.00 |
| 75 | A:PRO | 75 | 36.47  | 0.00 | 0.00 |

|     |       |     |        |      |      |
|-----|-------|-----|--------|------|------|
| 76  | A:THR | 76  | 99.30  | 0.00 | 0.00 |
| 77  | A:MET | 77  | 135.59 | 0.00 | 0.00 |
| 78  | A:GLY | 78  | 33.32  | 0.00 | 0.00 |
| 79  | A:PRO | 79  | 91.13  | 0.00 | 0.00 |
| 80  | A:ALA | 80  | 1.49   | 0.00 | 0.00 |
| 81  | A:THR | 81  | 89.89  | 0.00 | 0.00 |
| 82  | A:LEU | 82  | 28.42  | 0.00 | 0.00 |
| 83  | A:ALA | 83  | 77.82  | 0.00 | 0.00 |
| 84  | A:GLU | 84  | 32.66  | 0.00 | 0.00 |
| 85  | A:GLU | 85  | 52.70  | 0.00 | 0.00 |
| 86  | A:HIS | 86  | 159.33 | 0.00 | 0.00 |
| 87  | A:GLN | 87  | 113.80 | 0.00 | 0.00 |
| 88  | A:GLY | 88  | 52.60  | 0.00 | 0.00 |
| 89  | A:GLY | 89  | 22.38  | 0.00 | 0.00 |
| 90  | A:THR | 90  | 30.19  | 0.00 | 0.00 |
| 91  | A:VAL | 91  | 12.72  | 0.00 | 0.00 |
| 92  | A:CYS | 92  | 41.77  | 0.00 | 0.00 |
| 93  | A:LYS | 93  | 93.70  | 0.00 | 0.00 |
| 94  | A:ARG | 94  | 101.50 | 0.00 | 0.00 |
| 95  | A:ASP | 95  | 60.33  | 0.00 | 0.00 |
| 96  | A:GLN | 96  | 113.89 | 0.00 | 0.00 |
| 97  | A:SER | 97  | 5.11   | 0.00 | 0.00 |
| 98  | A:ASP | 98  | 97.77  | 0.00 | 0.00 |
| 99  | A:ARG | 99  | 35.12  | 0.00 | 0.00 |
| 100 | A:GLY | 100 | 5.27   | 0.00 | 0.00 |
| 101 | A:TRP | 101 | 184.07 | 0.00 | 0.00 |
| 102 | A:GLY | 102 | 79.65  | 0.00 | 0.00 |
| 103 | A:ASN | 103 | 48.25  | 0.00 | 0.00 |
| 104 | A:HIS | 104 | 192.64 | 0.00 | 0.00 |
| 105 | A:CYS | 105 | 19.81  | 0.00 | 0.00 |
| 106 | A:GLY | 106 | 52.63  | 0.00 | 0.00 |
| 107 | A:LEU | 107 | 101.90 | 0.00 | 0.00 |
| 108 | A:PHE | 108 | 139.45 | 0.00 | 0.00 |
| 109 | A:GLY | 109 | 30.32  | 0.00 | 0.00 |
| 110 | A:LYS | 110 | 114.38 | 0.00 | 0.00 |
| 111 | A:GLY | 111 | 4.23   | 0.00 | 0.00 |
| 112 | A:SER | 112 | 18.59  | 0.00 | 0.00 |
| 113 | A:ILE | 113 | 0.00   | 0.00 | 0.00 |
| 114 | A:VAL | 114 | 0.00   | 0.00 | 0.00 |
| 115 | A:ALA | 115 | 0.17   | 0.00 | 0.00 |
| 116 | A:CYS | 116 | 1.83   | 0.00 | 0.00 |
| 117 | A:VAL | 117 | 0.67   | 0.00 | 0.00 |
| 118 | A:LYS | 118 | 93.85  | 0.00 | 0.00 |
| 119 | A:ALA | 119 | 17.43  | 0.00 | 0.00 |
| 120 | A:ALA | 120 | 50.11  | 0.00 | 0.00 |
| 121 | A:CYS | 121 | 24.22  | 0.00 | 0.00 |
| 122 | A:GLU | 122 | 64.47  | 0.00 | 0.00 |
| 123 | A:ALA | 123 | 91.89  | 0.00 | 0.00 |
| 124 | A:LYS | 124 | 138.24 | 0.00 | 0.00 |
| 125 | A:LYS | 125 | 72.00  | 0.00 | 0.00 |
| 126 | A:LYS | 126 | 68.92  | 0.00 | 0.00 |
| 127 | A:ALA | 127 | 3.17   | 0.00 | 0.00 |
| 128 | A:THR | 128 | 11.80  | 0.00 | 0.00 |
| 129 | A:GLY | 129 | 0.00   | 0.00 | 0.00 |
| 130 | A:HIS | 130 | 6.13   | 0.00 | 0.00 |
| 131 | A:VAL | 131 | 46.31  | 0.00 | 0.00 |
| 132 | A:TYR | 132 | 16.12  | 0.00 | 0.00 |
| 133 | A:ASP | 133 | 54.11  | 0.00 | 0.00 |
| 134 | A:ALA | 134 | 49.87  | 0.00 | 0.00 |
| 135 | A:ASN | 135 | 111.23 | 0.00 | 0.00 |
| 136 | A:LYS | 136 | 128.53 | 0.00 | 0.00 |
| 137 | A:ILE | 137 | 0.12   | 0.00 | 0.00 |
| 138 | A:VAL | 138 | 27.17  | 0.00 | 0.00 |
| 139 | A:TYR | 139 | 2.00   | 0.00 | 0.00 |
| 140 | A:THR | 140 | 22.55  | 0.00 | 0.00 |
| 141 | A:VAL | 141 | 0.12   | 0.00 | 0.00 |
| 142 | A:LYS | 142 | 44.49  | 0.00 | 0.00 |
| 143 | A:VAL | 143 | 0.84   | 0.00 | 0.00 |
| 144 | A:GLU | 144 | 0.25   | 0.00 | 0.00 |

|     |       |     |        |      |      |
|-----|-------|-----|--------|------|------|
| 145 | A:PRO | 145 | 7.38   | 0.00 | 0.00 |
| 146 | A:HIS | 146 | 8.33   | 0.00 | 0.00 |
| 147 | A:THR | 147 | 35.21  | 0.00 | 0.00 |
| 148 | A:GLY | 148 | 16.28  | 0.00 | 0.00 |
| 149 | A:ASP | 149 | 49.00  | 0.00 | 0.00 |
| 150 | A:TYR | 150 | 83.28  | 0.00 | 0.00 |
| 151 | A:VAL | 151 | 27.89  | 0.00 | 0.00 |
| 152 | A:ALA | 152 | 54.35  | 0.00 | 0.00 |
| 153 | A:ALA | 153 | 86.37  | 0.00 | 0.00 |
| 154 | A:ASN | 154 | 145.43 | 0.00 | 0.00 |
| 155 | A:GLU | 155 | 103.24 | 0.00 | 0.00 |
| 156 | A:THR | 156 | 113.48 | 0.00 | 0.00 |
| 157 | A:HIS | 157 | 16.09  | 0.00 | 0.00 |
| 158 | A:SER | 158 | 119.10 | 0.00 | 0.00 |
| 159 | A:GLY | 159 | 21.12  | 0.00 | 0.00 |
| 160 | A:ARG | 160 | 64.09  | 0.00 | 0.00 |
| 161 | A:LYS | 161 | 83.09  | 0.00 | 0.00 |
| 162 | A:THR | 162 | 79.10  | 0.00 | 0.00 |
| 163 | A:ALA | 163 | 6.86   | 0.00 | 0.00 |
| 164 | A:SER | 164 | 77.00  | 0.00 | 0.00 |
| 165 | A:PHE | 165 | 2.37   | 0.00 | 0.00 |
| 166 | A:THR | 166 | 38.22  | 0.00 | 0.00 |
| 167 | A:VAL | 167 | 89.90  | 0.00 | 0.00 |
| 168 | A:SER | 168 | 98.65  | 0.00 | 0.00 |
| 169 | A:SER | 169 | 40.14  | 0.00 | 0.00 |
| 170 | A:GLU | 170 | 146.69 | 0.00 | 0.00 |
| 171 | A:LYS | 171 | 127.77 | 0.00 | 0.00 |
| 172 | A:THR | 172 | 43.48  | 0.00 | 0.00 |
| 173 | A:ILE | 173 | 95.72  | 0.00 | 0.00 |
| 174 | A:LEU | 174 | 21.93  | 0.00 | 0.00 |
| 175 | A:THR | 175 | 81.07  | 0.00 | 0.00 |
| 176 | A:MET | 176 | 13.11  | 0.00 | 0.00 |
| 177 | A:GLY | 177 | 61.62  | 0.00 | 0.00 |
| 178 | A:GLU | 178 | 119.63 | 0.00 | 0.00 |
| 179 | A:TYR | 179 | 30.05  | 0.00 | 0.00 |
| 180 | A:GLY | 180 | 10.72  | 0.00 | 0.00 |
| 181 | A:ASP | 181 | 34.67  | 0.00 | 0.00 |
| 182 | A:VAL | 182 | 2.62   | 0.00 | 0.00 |
| 183 | A:SER | 183 | 23.03  | 0.00 | 0.00 |
| 184 | A:LEU | 184 | 3.01   | 0.00 | 0.00 |
| 185 | A:LEU | 185 | 66.81  | 0.00 | 0.00 |
| 186 | A:CYS | 186 | 7.78   | 0.00 | 0.00 |
| 187 | A:ARG | 187 | 135.28 | 0.00 | 0.00 |
| 188 | A:VAL | 188 | 26.14  | 0.00 | 0.00 |
| 189 | A:ALA | 189 | 87.29  | 0.00 | 0.00 |
| 190 | A:SER | 190 | 19.06  | 0.00 | 0.00 |
| 191 | A:GLY | 191 | 13.78  | 0.00 | 0.00 |
| 192 | A:VAL | 192 | 22.46  | 0.00 | 0.00 |
| 193 | A:ASP | 193 | 88.10  | 0.00 | 0.00 |
| 194 | A:LEU | 194 | 24.08  | 0.00 | 0.00 |
| 195 | A:ALA | 195 | 76.02  | 0.00 | 0.00 |
| 196 | A:GLN | 196 | 80.45  | 0.00 | 0.00 |
| 197 | A:THR | 197 | 10.42  | 0.00 | 0.00 |
| 198 | A:VAL | 198 | 5.69   | 0.00 | 0.00 |
| 199 | A:ILE | 199 | 3.18   | 0.00 | 0.00 |
| 200 | A:LEU | 200 | 1.67   | 0.00 | 0.00 |
| 201 | A:GLU | 201 | 31.01  | 0.00 | 0.00 |
| 202 | A:LEU | 202 | 18.30  | 0.00 | 0.00 |
| 203 | A:ASP | 203 | 38.23  | 0.00 | 0.00 |
| 204 | A:LYS | 204 | 122.14 | 0.00 | 0.00 |
| 205 | A:THR | 205 | 98.46  | 0.00 | 0.00 |
| 206 | A:VAL | 206 | 72.55  | 0.00 | 0.00 |
| 207 | A:GLU | 207 | 144.46 | 0.00 | 0.00 |
| 208 | A:HIS | 208 | 175.54 | 0.00 | 0.00 |
| 209 | A:LEU | 209 | 62.63  | 0.00 | 0.00 |
| 210 | A:PRO | 210 | 59.42  | 0.00 | 0.00 |
| 211 | A:THR | 211 | 28.05  | 0.00 | 0.00 |
| 212 | A:ALA | 212 | 0.00   | 0.00 | 0.00 |
| 213 | A:TRP | 213 | 18.04  | 0.00 | 0.00 |

|     |       |     |        |      |      |
|-----|-------|-----|--------|------|------|
| 214 | A:GLN | 214 | 35.92  | 0.00 | 0.00 |
| 215 | A:VAL | 215 | 3.16   | 0.00 | 0.00 |
| 216 | A:HIS | 216 | 90.36  | 0.00 | 0.00 |
| 217 | A:ARG | 217 | 89.12  | 0.00 | 0.00 |
| 218 | A:ASP | 218 | 93.01  | 0.00 | 0.00 |
| 219 | A:TRP | 219 | 81.74  | 0.00 | 0.00 |
| 220 | A:PHE | 220 | 1.56   | 0.00 | 0.00 |
| 221 | A:ASN | 221 | 61.19  | 0.00 | 0.00 |
| 222 | A:ASP | 222 | 101.78 | 0.00 | 0.00 |
| 223 | A:LEU | 223 | 40.13  | 0.00 | 0.00 |
| 224 | A:ALA | 224 | 79.42  | 0.00 | 0.00 |
| 225 | A:LEU | 225 | 17.27  | 0.00 | 0.00 |
| 226 | A:PRO | 226 | 4.85   | 0.00 | 0.00 |
| 227 | A:TRP | 227 | 61.86  | 0.00 | 0.00 |
| 228 | A:LYS | 228 | 23.79  | 0.00 | 0.00 |
| 229 | A:HIS | 229 | 98.19  | 0.00 | 0.00 |
| 230 | A:GLU | 230 | 117.78 | 0.00 | 0.00 |
| 231 | A:GLY | 231 | 76.37  | 0.00 | 0.00 |
| 232 | A:ALA | 232 | 48.18  | 0.00 | 0.00 |
| 233 | A:GLN | 233 | 154.25 | 0.00 | 0.00 |
| 234 | A:ASN | 234 | 80.30  | 0.00 | 0.00 |
| 235 | A:TRP | 235 | 39.78  | 0.00 | 0.00 |
| 236 | A:ASN | 236 | 62.89  | 0.00 | 0.00 |
| 237 | A:ASN | 237 | 62.10  | 0.00 | 0.00 |
| 238 | A:ALA | 238 | 16.88  | 0.00 | 0.00 |
| 239 | A:GLU | 239 | 115.24 | 0.00 | 0.00 |
| 240 | A:ARG | 240 | 103.54 | 0.00 | 0.00 |
| 241 | A:LEU | 241 | 5.44   | 0.00 | 0.00 |
| 242 | A:VAL | 242 | 6.16   | 0.00 | 0.00 |
| 243 | A:GLU | 243 | 90.54  | 0.00 | 0.00 |
| 244 | A:PHE | 244 | 36.57  | 0.00 | 0.00 |
| 245 | A:GLY | 245 | 17.83  | 0.00 | 0.00 |
| 246 | A:ALA | 246 | 91.27  | 0.00 | 0.00 |
| 247 | A:PRO | 247 | 31.22  | 0.00 | 0.00 |
| 248 | A:HIS | 248 | 119.92 | 0.00 | 0.00 |
| 249 | A:ALA | 249 | 22.69  | 0.00 | 0.00 |
| 250 | A:VAL | 250 | 79.99  | 0.00 | 0.00 |
| 251 | A:LYS | 251 | 129.50 | 0.00 | 0.00 |
| 252 | A:MET | 252 | 12.69  | 0.00 | 0.00 |
| 253 | A:ASP | 253 | 72.00  | 0.00 | 0.00 |
| 254 | A:VAL | 254 | 34.83  | 0.00 | 0.00 |
| 255 | A:TYR | 255 | 115.21 | 0.00 | 0.00 |
| 256 | A:ASN | 256 | 65.31  | 0.00 | 0.00 |
| 257 | A:LEU | 257 | 99.59  | 0.00 | 0.00 |
| 258 | A:GLY | 258 | 22.46  | 0.00 | 0.00 |
| 259 | A:ASP | 259 | 61.51  | 0.00 | 0.00 |
| 260 | A:GLN | 260 | 41.02  | 0.00 | 0.00 |
| 261 | A:THR | 261 | 31.42  | 0.00 | 0.00 |
| 262 | A:GLY | 262 | 57.35  | 0.00 | 0.00 |
| 263 | A:VAL | 263 | 87.38  | 0.00 | 0.00 |
| 264 | A:LEU | 264 | 11.89  | 0.00 | 0.00 |
| 265 | A:LEU | 265 | 56.33  | 0.00 | 0.00 |
| 266 | A:LYS | 266 | 150.21 | 0.00 | 0.00 |
| 267 | A:ALA | 267 | 62.29  | 0.00 | 0.00 |
| 268 | A:LEU | 268 | 6.29   | 0.00 | 0.00 |
| 269 | A:ALA | 269 | 84.84  | 0.00 | 0.00 |
| 270 | A:GLY | 270 | 76.71  | 0.00 | 0.00 |
| 271 | A:VAL | 271 | 41.72  | 0.00 | 0.00 |
| 272 | A:PRO | 272 | 66.32  | 0.00 | 0.00 |
| 273 | A:VAL | 273 | 72.47  | 0.00 | 0.00 |
| 274 | A:ALA | 274 | 1.47   | 0.00 | 0.00 |
| 275 | A:HIS | 275 | 65.23  | 0.00 | 0.00 |
| 276 | A:ILE | 276 | 15.70  | 0.00 | 0.00 |
| 277 | A:GLU | 277 | 107.27 | 0.00 | 0.00 |
| 278 | A:GLY | 278 | 63.49  | 0.00 | 0.00 |
| 279 | A:THR | 279 | 63.87  | 0.00 | 0.00 |
| 280 | A:LYS | 280 | 81.07  | 0.00 | 0.00 |
| 281 | A:TYR | 281 | 25.03  | 0.00 | 0.00 |
| 282 | A:HIS | 282 | 36.08  | 0.00 | 0.00 |



|     |       |     |        |      |      |
|-----|-------|-----|--------|------|------|
| 283 | A:LEU | 283 | 1.84   | 0.00 | 0.00 |
| 284 | A:LYS | 284 | 113.23 | 0.00 | 0.00 |
| 285 | A:SER | 285 | 46.56  | 0.00 | 0.00 |
| 286 | A:GLY | 286 | 23.13  | 0.00 | 0.00 |
| 287 | A:HIS | 287 | 29.45  | 0.00 | 0.00 |
| 288 | A:VAL | 288 | 0.32   | 0.00 | 0.00 |
| 289 | A:THR | 289 | 7.50   | 0.00 | 0.00 |
| 290 | A:CYS | 290 | 2.77   | 0.00 | 0.00 |
| 291 | A:GLU | 291 | 45.78  | 0.00 | 0.00 |
| 292 | A:VAL | 292 | 1.66   | 0.00 | 0.00 |
| 293 | A:GLY | 293 | 9.33   | 0.00 | 0.00 |
| 294 | A:LEU | 294 | 4.84   | 0.00 | 0.00 |
| 295 | A:GLU | 295 | 113.26 | 0.00 | 0.00 |
| 296 | A:LYS | 296 | 115.25 | 0.00 | 0.00 |
| 297 | A:LEU | 297 | 9.99   | 0.00 | 0.00 |
| 298 | A:LYS | 298 | 125.57 | 0.00 | 0.00 |
| 299 | A:MET | 299 | 68.26  | 0.00 | 0.00 |
| 300 | A:LYS | 300 | 43.97  | 0.00 | 0.00 |
| 301 | A:GLY | 301 | 10.35  | 0.00 | 0.00 |
| 302 | A:LEU | 302 | 107.33 | 0.00 | 0.00 |
| 303 | A:THR | 303 | 132.02 | 0.00 | 0.00 |
| 304 | A:TYR | 304 | 75.83  | 0.00 | 0.00 |
| 305 | A:THR | 305 | 94.14  | 0.00 | 0.00 |
| 306 | A:MET | 306 | 101.62 | 0.00 | 0.00 |
| 307 | A:CYS | 307 | 10.44  | 0.00 | 0.00 |
| 308 | A:ASP | 308 | 74.30  | 0.00 | 0.00 |
| 309 | A:LYS | 309 | 131.91 | 0.00 | 0.00 |
| 310 | A:THR | 310 | 74.13  | 0.00 | 0.00 |
| 311 | A:LYS | 311 | 103.76 | 0.00 | 0.00 |
| 312 | A:PHE | 312 | 9.59   | 0.00 | 0.00 |
| 313 | A:THR | 313 | 75.95  | 0.00 | 0.00 |
| 314 | A:TRP | 314 | 68.99  | 0.00 | 0.00 |
| 315 | A:LYS | 315 | 124.05 | 0.00 | 0.00 |
| 316 | A:ARG | 316 | 140.85 | 0.00 | 0.00 |
| 317 | A:ALA | 317 | 49.57  | 0.00 | 0.00 |
| 318 | A:PRO | 318 | 7.24   | 0.00 | 0.00 |
| 319 | A:THR | 319 | 71.77  | 0.00 | 0.00 |
| 320 | A:ASP | 320 | 63.30  | 0.00 | 0.00 |
| 321 | A:SER | 321 | 22.85  | 0.00 | 0.00 |
| 322 | A:GLY | 322 | 74.71  | 0.00 | 0.00 |
| 323 | A:HIS | 323 | 40.31  | 0.00 | 0.00 |
| 324 | A:ASP | 324 | 40.41  | 0.00 | 0.00 |
| 325 | A:THR | 325 | 1.17   | 0.00 | 0.00 |
| 326 | A:VAL | 326 | 0.00   | 0.00 | 0.00 |
| 327 | A:VAL | 327 | 29.74  | 0.00 | 0.00 |
| 328 | A:MET | 328 | 3.88   | 0.00 | 0.00 |
| 329 | A:GLU | 329 | 28.12  | 0.00 | 0.00 |
| 330 | A:VAL | 330 | 5.58   | 0.00 | 0.00 |
| 331 | A:THR | 331 | 54.16  | 0.00 | 0.00 |
| 332 | A:PHE | 332 | 10.27  | 0.00 | 0.00 |
| 333 | A:SER | 333 | 64.87  | 0.00 | 0.00 |
| 334 | A:GLY | 334 | 37.20  | 0.00 | 0.00 |
| 335 | A:THR | 335 | 123.57 | 0.00 | 0.00 |
| 336 | A:LYS | 336 | 79.40  | 0.00 | 0.00 |
| 337 | A:PRO | 337 | 63.35  | 0.00 | 0.00 |
| 338 | A:CYS | 338 | 2.34   | 0.00 | 0.00 |
| 339 | A:ARG | 339 | 72.96  | 0.00 | 0.00 |
| 340 | A:ILE | 340 | 10.49  | 0.00 | 0.00 |
| 341 | A:PRO | 341 | 32.34  | 0.00 | 0.00 |
| 342 | A:VAL | 342 | 22.26  | 0.00 | 0.00 |
| 343 | A:ARG | 343 | 94.21  | 0.00 | 0.00 |
| 344 | A:ALA | 344 | 0.00   | 0.00 | 0.00 |
| 345 | A:VAL | 345 | 2.52   | 0.00 | 0.00 |
| 346 | A:ALA | 346 | 36.08  | 0.00 | 0.00 |
| 347 | A:HIS | 347 | 107.21 | 0.00 | 0.00 |
| 348 | A:GLY | 348 | 72.41  | 0.00 | 0.00 |
| 349 | A:SER | 349 | 53.04  | 0.00 | 0.00 |
| 350 | A:PRO | 350 | 90.60  | 0.00 | 0.00 |
| 351 | A:ASP | 351 | 137.90 | 0.00 | 0.00 |

|     |       |     |        |       |       |
|-----|-------|-----|--------|-------|-------|
| 352 | A:VAL | 352 | 90.33  | 0.00  | 0.00  |
| 353 | A:ASN | 353 | 85.72  | 0.00  | 0.00  |
| 354 | A:VAL | 354 | 35.62  | 0.00  | 0.00  |
| 355 | A:ALA | 355 | 17.22  | 0.00  | 0.00  |
| 356 | A:MET | 356 | 135.79 | 0.00  | 0.00  |
| 357 | A:LEU | 357 | 55.83  | 0.00  | 0.00  |
| 358 | A:ILE | 358 | 20.12  | 0.00  | 0.00  |
| 359 | A:THR | 359 | 12.89  | 0.00  | 0.00  |
| 360 | A:PRO | 360 | 50.94  | 0.00  | 0.00  |
| 361 | A:ASN | 361 | 31.16  | 0.00  | 0.00  |
| 362 | A:PRO | 362 | 14.22  | 0.00  | 0.00  |
| 363 | A:THR | 363 | 20.57  | 0.00  | 0.00  |
| 364 | A:ILE | 364 | 8.20   | 0.00  | 0.00  |
| 365 | A:GLU | 365 | 35.96  | 0.00  | 0.00  |
| 366 | A:ASN | 366 | 122.06 | 0.00  | 0.00  |
| 367 | A:ASN | 367 | 149.20 | 0.00  | 0.00  |
| 368 | A:GLY | 368 | 33.89  | 0.00  | 0.00  |
| 369 | A:GLY | 369 | 23.84  | 0.00  | 0.00  |
| 370 | A:GLY | 370 | 2.75   | 0.00  | 0.00  |
| 371 | A:PHE | 371 | 15.37  | 0.00  | 0.00  |
| 372 | A:ILE | 372 | 0.00   | 0.00  | 0.00  |
| 373 | A:GLU | 373 | 0.00   | 0.00  | 0.00  |
| 374 | A:MET | 374 | 0.00   | 0.00  | 0.00  |
| 375 | A:GLN | 375 | 51.01  | 0.00  | 0.00  |
| 376 | A:LEU | 376 | 3.69   | 0.00  | 0.00  |
| 377 | A:PRO | 377 | 45.82  | 0.00  | 0.00  |
| 378 | A:PRO | 378 | 54.33  | 0.00  | 0.00  |
| 379 | A:GLY | 379 | 24.22  | 0.00  | 0.00  |
| 380 | A:ASP | 380 | 68.35  | 0.00  | 0.00  |
| 381 | A:ASN | 381 | 2.30   | 0.00  | 0.00  |
| 382 | A:ILE | 382 | 26.77  | 0.00  | 0.00  |
| 383 | A:ILE | 383 | 0.12   | 0.00  | 0.00  |
| 384 | A:TYR | 384 | 56.65  | 0.00  | 0.00  |
| 385 | A:VAL | 385 | 0.15   | 0.00  | 0.00  |
| 386 | A:GLY | 386 | 20.09  | 0.00  | 0.00  |
| 387 | A:GLU | 387 | 109.09 | 0.00  | 0.00  |
| 388 | A:LEU | 388 | 44.39  | 0.00  | 0.00  |
| 389 | A:SER | 389 | 63.19  | 0.00  | 0.00  |
| 390 | A:HIS | 390 | 63.24  | 0.00  | 0.00  |
| 391 | A:GLN | 391 | 117.74 | 0.00  | 0.00  |
| 392 | A:TRP | 392 | 38.02  | 0.00  | 0.00  |
| 393 | A:PHE | 393 | 147.35 | 0.00  | 0.00  |
| 394 | A:GLN | 394 | 3.61   | 0.00  | 0.00  |
| 395 | A:LYS | 395 | 109.76 | 0.00  | 0.00  |
| 396 | A:GLY | 396 | 54.69  | 0.00  | 0.00  |
| 397 | A:SER | 397 | 52.78  | 0.00  | 0.00  |
| 398 | A:SER | 398 | 72.13  | 0.00  | 0.00  |
| 399 | A:ILE | 399 | 147.01 | 0.00  | 0.00  |
| 400 | A:GLY | 400 | 30.98  | 0.00  | 0.00  |
| 401 | A:ARG | 401 | 55.06  | 0.00  | 0.00  |
| 402 | A:VAL | 402 | 98.89  | 0.00  | 0.00  |
| 403 | A:PHE | 403 | 135.14 | 0.00  | 0.00  |
| 404 | A:GLN | 404 | 100.64 | 0.00  | 0.00  |
| 405 | A:LYS | 405 | 155.66 | 0.00  | 0.00  |
| 406 | A:THR | 406 | 80.60  | 0.00  | 0.00  |
| 407 | A:LYS | 407 | 99.25  | 0.00  | 0.00  |
| 408 | A:LYS | 408 | 74.62  | 0.00  | 0.00  |
| 409 | A:GLY | 409 | 26.00  | 0.00  | 0.00  |
| 410 | A:ILE | 410 | 102.02 | 29.75 | 0.47  |
| 411 | A:GLU | 411 | 83.44  | 0.00  | 0.00  |
| 412 | A:ARG | 412 | 43.19  | 0.00  | 0.00  |
| 413 | A:LEU | 413 | 56.61  | 34.54 | 0.44  |
| 414 | A:THR | 414 | 74.95  | 33.54 | -0.14 |
| 415 | A:VAL | 415 | 107.87 | 12.19 | -0.13 |
| 416 | A:ILE | 416 | 15.46  | 4.46  | 0.07  |
| 417 | A:GLY | 417 | 20.85  | 20.51 | 0.28  |
| 418 | A:GLU | 418 | 61.48  | 4.42  | -0.05 |
| 419 | A:HIS | 419 | 50.51  | 0.00  | 0.00  |
| 420 | A:ALA | 420 | 14.50  | 0.00  | 0.00  |

|     |       |     |   |        |       |  |       |
|-----|-------|-----|---|--------|-------|--|-------|
| 421 | A:TRP | 421 |   | 79.24  | 17.69 |  | 0.28  |
| 422 | A:ASP | 422 |   | 28.25  | 0.00  |  | 0.00  |
| 423 | A:PHE | 423 |   | 39.74  | 0.00  |  | 0.00  |
| 424 | A:GLY | 424 |   | 32.28  | 0.00  |  | 0.00  |
| 425 | A:SER | 425 |   | 34.72  | 0.00  |  | 0.00  |
| 426 | A:ALA | 426 |   | 116.00 | 0.00  |  | 0.00  |
| 427 | A:GLY | 427 |   | 51.23  | 0.00  |  | 0.00  |
| 428 | A:GLY | 428 |   | 50.43  | 0.00  |  | 0.00  |
| 429 | A:PHE | 429 |   | 167.93 | 0.00  |  | 0.00  |
| 430 | A:LEU | 430 |   | 147.49 | 0.00  |  | 0.00  |
| 431 | A:SER | 431 |   | 15.43  | 0.00  |  | 0.00  |
| 432 | A:SER | 432 |   | 66.48  | 0.00  |  | 0.00  |
| 433 | A:ILE | 433 |   | 100.74 | 0.00  |  | 0.00  |
| 434 | A:GLY | 434 |   | 11.96  | 3.70  |  | 0.04  |
| 435 | A:LYS | 435 |   | 76.81  | 0.00  |  | 0.00  |
| 436 | A:ALA | 436 |   | 53.20  | 0.00  |  | 0.00  |
| 437 | A:VAL | 437 |   | 84.46  | 16.91 |  | 0.27  |
| 438 | A:HIS | 438 | H | 56.25  | 54.42 |  | 0.76  |
| 439 | A:THR | 439 |   | 65.43  | 0.00  |  | 0.00  |
| 440 | A:VAL | 440 |   | 98.97  | 0.00  |  | 0.00  |
| 441 | A:LEU | 441 |   | 121.82 | 20.26 |  | 0.32  |
| 442 | A:GLY | 442 |   | 32.48  | 17.83 |  | 0.24  |
| 443 | A:GLY | 443 |   | 38.24  | 0.00  |  | 0.00  |
| 444 | A:ALA | 444 |   | 62.91  | 0.00  |  | 0.00  |
| 445 | A:PHE | 445 |   | 41.55  | 2.50  |  | 0.04  |
| 446 | A:ASN | 446 |   | 100.51 | 4.35  |  | -0.02 |
| 447 | A:SER | 447 |   | 94.79  | 0.00  |  | 0.00  |
| 448 | A:ILE | 448 |   | 112.16 | 0.00  |  | 0.00  |
| 449 | A:PHE | 449 |   | 25.19  | 0.00  |  | 0.00  |
| 450 | A:GLY | 450 |   | 46.09  | 0.00  |  | 0.00  |
| 451 | A:GLY | 451 |   | 83.38  | 0.00  |  | 0.00  |
| 452 | A:VAL | 452 |   | 56.98  | 0.00  |  | 0.00  |
| 453 | A:GLY | 453 |   | 35.78  | 0.00  |  | 0.00  |
| 454 | A:PHE | 454 |   | 91.84  | 0.00  |  | 0.00  |
| 455 | A:LEU | 455 |   | 120.38 | 0.00  |  | 0.00  |
| 456 | A:PRO | 456 |   | 64.32  | 0.00  |  | 0.00  |
| 457 | A:LYS | 457 |   | 35.12  | 0.00  |  | 0.00  |
| 458 | A:LEU | 458 |   | 52.81  | 0.00  |  | 0.00  |
| 459 | A:LEU | 459 |   | 123.34 | 0.00  |  | 0.00  |
| 460 | A:LEU | 460 |   | 78.94  | 0.00  |  | 0.00  |
| 461 | A:GLY | 461 |   | 0.14   | 0.00  |  | 0.00  |
| 462 | A:VAL | 462 |   | 76.66  | 0.00  |  | 0.00  |
| 463 | A:ALA | 463 |   | 50.59  | 0.00  |  | 0.00  |
| 464 | A:LEU | 464 |   | 55.72  | 0.00  |  | 0.00  |
| 465 | A:ALA | 465 |   | 22.48  | 0.00  |  | 0.00  |
| 466 | A:TRP | 466 |   | 154.35 | 0.00  |  | 0.00  |
| 467 | A:LEU | 467 |   | 80.28  | 0.00  |  | 0.00  |
| 468 | A:GLY | 468 |   | 0.17   | 0.00  |  | 0.00  |
| 469 | A:LEU | 469 |   | 123.39 | 0.00  |  | 0.00  |
| 470 | A:ASN | 470 |   | 87.85  | 0.00  |  | 0.00  |
| 471 | A:MET | 471 |   | 58.58  | 0.00  |  | 0.00  |
| 472 | A:ARG | 472 |   | 217.43 | 0.00  |  | 0.00  |
| 473 | A:ASN | 473 |   | 59.59  | 0.00  |  | 0.00  |
| 474 | A:PRO | 474 |   | 98.38  | 0.00  |  | 0.00  |
| 475 | A:THR | 475 |   | 100.49 | 0.00  |  | 0.00  |
| 476 | A:MET | 476 |   | 93.99  | 0.00  |  | 0.00  |
| 477 | A:SER | 477 |   | 13.07  | 0.00  |  | 0.00  |
| 478 | A:MET | 478 |   | 141.64 | 0.00  |  | 0.00  |
| 479 | A:SER | 479 |   | 70.17  | 0.00  |  | 0.00  |
| 480 | A:PHE | 480 |   | 74.65  | 0.00  |  | 0.00  |
| 481 | A:LEU | 481 |   | 60.26  | 0.00  |  | 0.00  |
| 482 | A:LEU | 482 |   | 115.41 | 0.00  |  | 0.00  |
| 483 | A:ALA | 483 |   | 50.75  | 0.00  |  | 0.00  |
| 484 | A:GLY | 484 |   | 0.00   | 0.00  |  | 0.00  |
| 485 | A:GLY | 485 |   | 33.16  | 0.00  |  | 0.00  |
| 486 | A:LEU | 486 |   | 108.69 | 0.00  |  | 0.00  |
| 487 | A:VAL | 487 |   | 16.50  | 0.00  |  | 0.00  |
| 488 | A:LEU | 488 |   | 40.84  | 0.00  |  | 0.00  |
| 489 | A:ALA | 489 |   | 65.30  | 0.00  |  | 0.00  |

|     |       |     |        |       |  |      |
|-----|-------|-----|--------|-------|--|------|
| 490 | A:MET | 490 | 81.75  | 32.03 |  | 0.64 |
| 491 | A:THR | 491 | 5.80   | 0.00  |  | 0.00 |
| 492 | A:LEU | 492 | 118.58 | 0.00  |  | 0.00 |
| 493 | A:GLY | 493 | 63.66  | 0.80  |  | 0.01 |
| 494 | A:VAL | 494 | 125.71 | 34.28 |  | 0.54 |

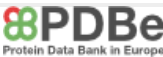

is a member of

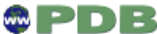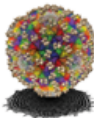

EMDataBank  
Unified Data Resource for 3DEM

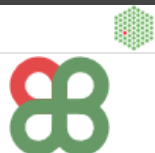

Protein Data

PDBePISA

Bank

[pdbe.org/pisa](http://pdbe.org/pisa)

in Europe

Bringing Structure  
to Biology

[Feedback](#)

[Share](#)

[Services](#)

[Research](#)

[Training](#)

[About us](#)

[PDB](#)

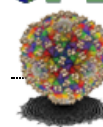

EMDataBank

Unified Data Resource for 3DEM

## PISA Interface.

Session Map (id=179-P6-IE2)

[Start](#)

[Interfaces](#)

[Interface Search](#)

[Monomers](#)

[Assemblies](#)

**interface # 21 in ourmodelfortest2.pdb crystal.**

Space symmetry group: P 1

**interface #21/96**

[XML](#) [<<](#) [<](#) [>](#) [>>](#)

### Interface Summary

[XML](#)

View [structure 1](#) [interface](#) [structure 2](#)

Download

[structure 1](#) [interface](#) [structure 2](#)

This interface scored

**0.350**

in Complex Formation Significance Score (CSS).

CSS ranges from 0 to 1 as interface relevance to complex formation increases.

Achieved CSS implies that the interface plays an auxiliary role in complex formation

|                                   | Structure 1 |         | Structure 2 |        |
|-----------------------------------|-------------|---------|-------------|--------|
| <u>Selection range</u>            | [CPL]B:500  |         | B           |        |
| class                             | Ligand      |         | Protein     |        |
| symmetry operation                | x,y,z       |         | x,y,z       |        |
| symmetry ID                       | 1_555       |         | 0_555       |        |
| <u>Number of atoms</u>            |             |         |             |        |
| interface                         | 27          | 96.4%   | 52          | 1.4%   |
| surface                           | 27          | 96.4%   | 2443        | 65.2%  |
| total                             | 28          | 100.0%  | 3746        | 100.0% |
| <u>Number of residues</u>         |             |         |             |        |
| interface                         | 1           | 100.0%  | 19          | 3.8%   |
| surface                           | 1           | 100.0%  | 485         | 98.2%  |
| total                             | 1           | 100.0%  | 494         | 100.0% |
| <u>Solvent-accessible area, Å</u> |             |         |             |        |
| interface                         | 396.9       | 60.1%   | 350.3       | 1.3%   |
| total                             | 660.8       | 100.0%  | 27658.7     | 100.0% |
| <u>Solvation energy, kcal/mol</u> |             |         |             |        |
| isolated structure                | 2.3         | 100.0%  | -446.5      | 100.0% |
| gain on complex formation         | -2.8        | -119.8% | -4.6        | 1.0%   |
| average gain                      | -2.3        | -100.0% | -1.9        | 0.4%   |
| P-value                           | 0.473       |         | 0.120       |        |

No disulfide bonds found

No covalent bonds found

No hydrogen bonds found

No salt bridges found

### Interfacing residues (not a contact table)

[XML](#) Display level: [Residues](#)

Inaccessible residues

HSDC

Residues making **Hydrogen/Disulphide bond**, **Salt bridge** or **Covalent link**

Solvent-accessible residues

Interfacing residues

**ASA** Accessible Surface Area, Å<sup>2</sup> **BSA** Buried Surface Area, Å<sup>2</sup> **Δ<sup>i</sup>G** Solvation energy effect, kcal/mol |||| Buried area percentage, one bar per 10%

| ## | Structure 1 | HSDC | ASA    | BSA    | Δ <sup>i</sup> G | ##   | Structure 2 | HSDC | ASA   | BSA  | Δ <sup>i</sup> G |
|----|-------------|------|--------|--------|------------------|------|-------------|------|-------|------|------------------|
| 1  | B:CPL 500   |      | 660.81 | 396.94 |                  | 2.80 | 1 B:SER     | 1    | 13.19 | 0.00 | 0.00             |
|    |             |      |        |        |                  |      | 2 B:ARG     | 2    | 62.08 | 0.00 | 0.00             |
|    |             |      |        |        |                  |      | 3 B:CYS     | 3    | 0.00  | 0.00 | 0.00             |
|    |             |      |        |        |                  |      | 4 B:THR     | 4    | 26.46 | 0.00 | 0.00             |
|    |             |      |        |        |                  |      | 5 B:HIS     | 5    | 71.79 | 0.00 | 0.00             |

|    |       |    |        |      |      |
|----|-------|----|--------|------|------|
| 6  | B:LEU | 6  | 49.54  | 0.00 | 0.00 |
| 7  | B:GLU | 7  | 172.99 | 0.00 | 0.00 |
| 8  | B:ASN | 8  | 67.62  | 0.00 | 0.00 |
| 9  | B:ARG | 9  | 9.60   | 0.00 | 0.00 |
| 10 | B:ASP | 10 | 14.86  | 0.00 | 0.00 |
| 11 | B:PHE | 11 | 72.10  | 0.00 | 0.00 |
| 12 | B:VAL | 12 | 19.22  | 0.00 | 0.00 |
| 13 | B:THR | 13 | 95.23  | 0.00 | 0.00 |
| 14 | B:GLY | 14 | 18.51  | 0.00 | 0.00 |
| 15 | B:THR | 15 | 97.73  | 0.00 | 0.00 |
| 16 | B:GLN | 16 | 159.83 | 0.00 | 0.00 |
| 17 | B:GLY | 17 | 66.54  | 0.00 | 0.00 |
| 18 | B:THR | 18 | 51.44  | 0.00 | 0.00 |
| 19 | B:THR | 19 | 65.81  | 0.00 | 0.00 |
| 20 | B:ARG | 20 | 144.33 | 0.00 | 0.00 |
| 21 | B:VAL | 21 | 17.37  | 0.00 | 0.00 |
| 22 | B:THR | 22 | 26.28  | 0.00 | 0.00 |
| 23 | B:LEU | 23 | 0.17   | 0.00 | 0.00 |
| 24 | B:VAL | 24 | 3.44   | 0.00 | 0.00 |
| 25 | B:LEU | 25 | 4.19   | 0.00 | 0.00 |
| 26 | B:GLU | 26 | 41.84  | 0.00 | 0.00 |
| 27 | B:LEU | 27 | 34.43  | 0.00 | 0.00 |
| 28 | B:GLY | 28 | 54.39  | 0.00 | 0.00 |
| 29 | B:GLY | 29 | 7.41   | 0.00 | 0.00 |
| 30 | B:CYS | 30 | 9.61   | 0.00 | 0.00 |
| 31 | B:VAL | 31 | 6.52   | 0.00 | 0.00 |
| 32 | B:THR | 32 | 0.24   | 0.00 | 0.00 |
| 33 | B:ILE | 33 | 4.52   | 0.00 | 0.00 |
| 34 | B:THR | 34 | 28.86  | 0.00 | 0.00 |
| 35 | B:ALA | 35 | 18.64  | 0.00 | 0.00 |
| 36 | B:GLU | 36 | 90.86  | 0.00 | 0.00 |
| 37 | B:GLY | 37 | 49.68  | 0.00 | 0.00 |
| 38 | B:LYS | 38 | 59.39  | 0.00 | 0.00 |
| 39 | B:PRO | 39 | 11.15  | 0.00 | 0.00 |
| 40 | B:SER | 40 | 3.71   | 0.00 | 0.00 |
| 41 | B:MET | 41 | 0.50   | 0.00 | 0.00 |
| 42 | B:ASP | 42 | 0.00   | 0.00 | 0.00 |
| 43 | B:VAL | 43 | 1.50   | 0.00 | 0.00 |
| 44 | B:TRP | 44 | 11.17  | 0.00 | 0.00 |
| 45 | B:LEU | 45 | 4.80   | 0.00 | 0.00 |
| 46 | B:ASP | 46 | 63.90  | 0.00 | 0.00 |
| 47 | B:ALA | 47 | 16.50  | 0.00 | 0.00 |
| 48 | B:ILE | 48 | 0.17   | 0.00 | 0.00 |
| 49 | B:TYR | 49 | 42.21  | 0.00 | 0.00 |
| 50 | B:GLN | 50 | 6.18   | 0.00 | 0.00 |
| 51 | B:GLU | 51 | 86.82  | 0.00 | 0.00 |
| 52 | B:ASN | 52 | 106.48 | 0.00 | 0.00 |
| 53 | B:PRO | 53 | 14.50  | 0.00 | 0.00 |
| 54 | B:ALA | 54 | 51.97  | 0.00 | 0.00 |
| 55 | B:LYS | 55 | 107.55 | 0.00 | 0.00 |
| 56 | B:THR | 56 | 36.79  | 0.00 | 0.00 |
| 57 | B:ARG | 57 | 53.86  | 0.00 | 0.00 |
| 58 | B:GLU | 58 | 20.06  | 0.00 | 0.00 |
| 59 | B:TYR | 59 | 2.60   | 0.00 | 0.00 |
| 60 | B:CYS | 60 | 2.65   | 0.00 | 0.00 |
| 61 | B:LEU | 61 | 4.69   | 0.00 | 0.00 |
| 62 | B:HIS | 62 | 50.03  | 0.00 | 0.00 |
| 63 | B:ALA | 63 | 8.96   | 0.00 | 0.00 |
| 64 | B:LYS | 64 | 116.66 | 0.00 | 0.00 |
| 65 | B:LEU | 65 | 46.30  | 0.00 | 0.00 |
| 66 | B:SER | 66 | 55.95  | 0.00 | 0.00 |
| 67 | B:ASP | 67 | 76.08  | 0.00 | 0.00 |
| 68 | B:THR | 68 | 86.97  | 0.00 | 0.00 |
| 69 | B:LYS | 69 | 96.96  | 0.00 | 0.00 |
| 70 | B:VAL | 70 | 62.09  | 0.00 | 0.00 |
| 71 | B:ALA | 71 | 30.26  | 0.00 | 0.00 |
| 72 | B:ALA | 72 | 25.65  | 0.00 | 0.00 |
| 73 | B:ARG | 73 | 108.62 | 0.00 | 0.00 |
| 74 | B:CYS | 74 | 34.99  | 0.00 | 0.00 |

|     |       |     |        |      |      |
|-----|-------|-----|--------|------|------|
| 75  | B:PRO | 75  | 29.22  | 0.00 | 0.00 |
| 76  | B:THR | 76  | 90.66  | 0.00 | 0.00 |
| 77  | B:MET | 77  | 130.59 | 0.00 | 0.00 |
| 78  | B:GLY | 78  | 33.91  | 0.00 | 0.00 |
| 79  | B:PRO | 79  | 86.74  | 0.00 | 0.00 |
| 80  | B:ALA | 80  | 1.83   | 0.00 | 0.00 |
| 81  | B:THR | 81  | 95.63  | 0.00 | 0.00 |
| 82  | B:LEU | 82  | 37.13  | 0.00 | 0.00 |
| 83  | B:ALA | 83  | 72.12  | 0.00 | 0.00 |
| 84  | B:GLU | 84  | 33.22  | 0.00 | 0.00 |
| 85  | B:GLU | 85  | 59.77  | 0.00 | 0.00 |
| 86  | B:HIS | 86  | 165.39 | 0.00 | 0.00 |
| 87  | B:GLN | 87  | 111.68 | 0.00 | 0.00 |
| 88  | B:GLY | 88  | 49.83  | 0.00 | 0.00 |
| 89  | B:GLY | 89  | 23.11  | 0.00 | 0.00 |
| 90  | B:THR | 90  | 29.93  | 0.00 | 0.00 |
| 91  | B:VAL | 91  | 16.39  | 0.00 | 0.00 |
| 92  | B:CYS | 92  | 39.69  | 0.00 | 0.00 |
| 93  | B:LYS | 93  | 88.51  | 0.00 | 0.00 |
| 94  | B:ARG | 94  | 106.99 | 0.00 | 0.00 |
| 95  | B:ASP | 95  | 52.11  | 0.00 | 0.00 |
| 96  | B:GLN | 96  | 108.11 | 0.00 | 0.00 |
| 97  | B:SER | 97  | 3.35   | 0.00 | 0.00 |
| 98  | B:ASP | 98  | 97.65  | 0.00 | 0.00 |
| 99  | B:ARG | 99  | 32.90  | 0.00 | 0.00 |
| 100 | B:GLY | 100 | 4.01   | 0.00 | 0.00 |
| 101 | B:TRP | 101 | 177.25 | 0.00 | 0.00 |
| 102 | B:GLY | 102 | 76.61  | 0.00 | 0.00 |
| 103 | B:ASN | 103 | 41.34  | 0.00 | 0.00 |
| 104 | B:HIS | 104 | 170.10 | 0.00 | 0.00 |
| 105 | B:CYS | 105 | 6.20   | 0.00 | 0.00 |
| 106 | B:GLY | 106 | 57.55  | 0.00 | 0.00 |
| 107 | B:LEU | 107 | 100.01 | 0.00 | 0.00 |
| 108 | B:PHE | 108 | 138.71 | 0.00 | 0.00 |
| 109 | B:GLY | 109 | 29.80  | 0.00 | 0.00 |
| 110 | B:LYS | 110 | 114.93 | 0.00 | 0.00 |
| 111 | B:GLY | 111 | 0.82   | 0.00 | 0.00 |
| 112 | B:SER | 112 | 25.30  | 0.00 | 0.00 |
| 113 | B:ILE | 113 | 0.12   | 0.00 | 0.00 |
| 114 | B:VAL | 114 | 0.50   | 0.00 | 0.00 |
| 115 | B:ALA | 115 | 2.32   | 0.00 | 0.00 |
| 116 | B:CYS | 116 | 2.09   | 0.00 | 0.00 |
| 117 | B:VAL | 117 | 2.98   | 0.00 | 0.00 |
| 118 | B:LYS | 118 | 82.26  | 0.00 | 0.00 |
| 119 | B:ALA | 119 | 13.89  | 0.00 | 0.00 |
| 120 | B:ALA | 120 | 54.15  | 0.00 | 0.00 |
| 121 | B:CYS | 121 | 22.94  | 0.00 | 0.00 |
| 122 | B:GLU | 122 | 56.40  | 0.00 | 0.00 |
| 123 | B:ALA | 123 | 76.55  | 0.00 | 0.00 |
| 124 | B:LYS | 124 | 144.92 | 0.00 | 0.00 |
| 125 | B:LYS | 125 | 70.16  | 0.00 | 0.00 |
| 126 | B:LYS | 126 | 76.17  | 0.00 | 0.00 |
| 127 | B:ALA | 127 | 3.16   | 0.00 | 0.00 |
| 128 | B:THR | 128 | 18.86  | 0.00 | 0.00 |
| 129 | B:GLY | 129 | 0.00   | 0.00 | 0.00 |
| 130 | B:HIS | 130 | 7.88   | 0.00 | 0.00 |
| 131 | B:VAL | 131 | 45.50  | 0.00 | 0.00 |
| 132 | B:TYR | 132 | 18.90  | 0.00 | 0.00 |
| 133 | B:ASP | 133 | 66.44  | 0.00 | 0.00 |
| 134 | B:ALA | 134 | 53.14  | 0.00 | 0.00 |
| 135 | B:ASN | 135 | 113.50 | 0.00 | 0.00 |
| 136 | B:LYS | 136 | 125.12 | 0.00 | 0.00 |
| 137 | B:ILE | 137 | 2.10   | 0.00 | 0.00 |
| 138 | B:VAL | 138 | 28.40  | 0.00 | 0.00 |
| 139 | B:TYR | 139 | 2.99   | 0.00 | 0.00 |
| 140 | B:THR | 140 | 23.67  | 0.00 | 0.00 |
| 141 | B:VAL | 141 | 0.67   | 0.00 | 0.00 |
| 142 | B:LYS | 142 | 42.00  | 0.00 | 0.00 |
| 143 | B:VAL | 143 | 0.82   | 0.00 | 0.00 |

|     |       |     |        |      |      |
|-----|-------|-----|--------|------|------|
| 144 | B:GLU | 144 | 0.98   | 0.00 | 0.00 |
| 145 | B:PRO | 145 | 5.08   | 0.00 | 0.00 |
| 146 | B:HIS | 146 | 18.49  | 0.00 | 0.00 |
| 147 | B:THR | 147 | 35.71  | 0.00 | 0.00 |
| 148 | B:GLY | 148 | 19.54  | 0.00 | 0.00 |
| 149 | B:ASP | 149 | 67.55  | 0.00 | 0.00 |
| 150 | B:TYR | 150 | 68.66  | 0.00 | 0.00 |
| 151 | B:VAL | 151 | 38.49  | 0.00 | 0.00 |
| 152 | B:ALA | 152 | 51.62  | 0.00 | 0.00 |
| 153 | B:ALA | 153 | 90.69  | 0.00 | 0.00 |
| 154 | B:ASN | 154 | 138.75 | 0.00 | 0.00 |
| 155 | B:GLU | 155 | 88.06  | 0.00 | 0.00 |
| 156 | B:THR | 156 | 129.25 | 0.00 | 0.00 |
| 157 | B:HIS | 157 | 25.58  | 0.00 | 0.00 |
| 158 | B:SER | 158 | 115.86 | 0.00 | 0.00 |
| 159 | B:GLY | 159 | 17.57  | 0.00 | 0.00 |
| 160 | B:ARG | 160 | 76.96  | 0.00 | 0.00 |
| 161 | B:LYS | 161 | 75.13  | 0.00 | 0.00 |
| 162 | B:THR | 162 | 81.19  | 0.00 | 0.00 |
| 163 | B:ALA | 163 | 5.50   | 0.00 | 0.00 |
| 164 | B:SER | 164 | 72.97  | 0.00 | 0.00 |
| 165 | B:PHE | 165 | 1.29   | 0.00 | 0.00 |
| 166 | B:THR | 166 | 36.71  | 0.00 | 0.00 |
| 167 | B:VAL | 167 | 83.35  | 0.00 | 0.00 |
| 168 | B:SER | 168 | 74.77  | 0.00 | 0.00 |
| 169 | B:SER | 169 | 74.87  | 0.00 | 0.00 |
| 170 | B:GLU | 170 | 65.76  | 0.00 | 0.00 |
| 171 | B:LYS | 171 | 123.55 | 0.00 | 0.00 |
| 172 | B:THR | 172 | 40.75  | 0.00 | 0.00 |
| 173 | B:ILE | 173 | 93.30  | 0.00 | 0.00 |
| 174 | B:LEU | 174 | 17.67  | 0.00 | 0.00 |
| 175 | B:THR | 175 | 90.16  | 0.00 | 0.00 |
| 176 | B:MET | 176 | 12.22  | 0.00 | 0.00 |
| 177 | B:GLY | 177 | 58.43  | 0.00 | 0.00 |
| 178 | B:GLU | 178 | 102.49 | 0.00 | 0.00 |
| 179 | B:TYR | 179 | 29.99  | 0.00 | 0.00 |
| 180 | B:GLY | 180 | 11.49  | 0.00 | 0.00 |
| 181 | B:ASP | 181 | 36.75  | 0.00 | 0.00 |
| 182 | B:VAL | 182 | 2.77   | 0.00 | 0.00 |
| 183 | B:SER | 183 | 26.79  | 0.00 | 0.00 |
| 184 | B:LEU | 184 | 1.28   | 0.00 | 0.00 |
| 185 | B:LEU | 185 | 30.39  | 0.00 | 0.00 |
| 186 | B:CYS | 186 | 2.33   | 0.00 | 0.00 |
| 187 | B:ARG | 187 | 126.37 | 0.00 | 0.00 |
| 188 | B:VAL | 188 | 15.85  | 0.00 | 0.00 |
| 189 | B:ALA | 189 | 99.88  | 0.00 | 0.00 |
| 190 | B:SER | 190 | 34.31  | 0.00 | 0.00 |
| 191 | B:GLY | 191 | 10.49  | 0.00 | 0.00 |
| 192 | B:VAL | 192 | 21.78  | 0.00 | 0.00 |
| 193 | B:ASP | 193 | 88.32  | 0.00 | 0.00 |
| 194 | B:LEU | 194 | 36.05  | 0.00 | 0.00 |
| 195 | B:ALA | 195 | 75.11  | 0.00 | 0.00 |
| 196 | B:GLN | 196 | 82.27  | 0.00 | 0.00 |
| 197 | B:THR | 197 | 18.06  | 0.00 | 0.00 |
| 198 | B:VAL | 198 | 2.02   | 0.00 | 0.00 |
| 199 | B:ILE | 199 | 2.35   | 0.00 | 0.00 |
| 200 | B:LEU | 200 | 1.17   | 0.00 | 0.00 |
| 201 | B:GLU | 201 | 19.84  | 0.00 | 0.00 |
| 202 | B:LEU | 202 | 25.30  | 0.00 | 0.00 |
| 203 | B:ASP | 203 | 40.77  | 0.00 | 0.00 |
| 204 | B:LYS | 204 | 103.91 | 0.00 | 0.00 |
| 205 | B:THR | 205 | 110.40 | 0.00 | 0.00 |
| 206 | B:VAL | 206 | 68.15  | 0.00 | 0.00 |
| 207 | B:GLU | 207 | 133.90 | 0.00 | 0.00 |
| 208 | B:HIS | 208 | 177.89 | 0.00 | 0.00 |
| 209 | B:LEU | 209 | 71.25  | 0.00 | 0.00 |
| 210 | B:PRO | 210 | 50.04  | 0.00 | 0.00 |
| 211 | B:THR | 211 | 29.12  | 0.00 | 0.00 |
| 212 | B:ALA | 212 | 0.00   | 0.00 | 0.00 |



|     |       |     |        |      |      |
|-----|-------|-----|--------|------|------|
| 213 | B:TRP | 213 | 18.24  | 0.00 | 0.00 |
| 214 | B:GLN | 214 | 28.24  | 0.00 | 0.00 |
| 215 | B:VAL | 215 | 3.13   | 0.00 | 0.00 |
| 216 | B:HIS | 216 | 89.31  | 0.00 | 0.00 |
| 217 | B:ARG | 217 | 87.77  | 0.00 | 0.00 |
| 218 | B:ASP | 218 | 79.23  | 0.00 | 0.00 |
| 219 | B:TRP | 219 | 85.95  | 0.00 | 0.00 |
| 220 | B:PHE | 220 | 0.94   | 0.00 | 0.00 |
| 221 | B:ASN | 221 | 54.50  | 0.00 | 0.00 |
| 222 | B:ASP | 222 | 114.50 | 0.00 | 0.00 |
| 223 | B:LEU | 223 | 40.18  | 0.00 | 0.00 |
| 224 | B:ALA | 224 | 71.61  | 0.00 | 0.00 |
| 225 | B:LEU | 225 | 21.89  | 0.00 | 0.00 |
| 226 | B:PRO | 226 | 4.68   | 0.00 | 0.00 |
| 227 | B:TRP | 227 | 55.04  | 0.00 | 0.00 |
| 228 | B:LYS | 228 | 27.66  | 0.00 | 0.00 |
| 229 | B:HIS | 229 | 106.09 | 0.00 | 0.00 |
| 230 | B:GLU | 230 | 123.89 | 0.00 | 0.00 |
| 231 | B:GLY | 231 | 75.70  | 0.00 | 0.00 |
| 232 | B:ALA | 232 | 49.67  | 0.00 | 0.00 |
| 233 | B:GLN | 233 | 156.83 | 0.00 | 0.00 |
| 234 | B:ASN | 234 | 69.01  | 0.00 | 0.00 |
| 235 | B:TRP | 235 | 34.05  | 0.00 | 0.00 |
| 236 | B:ASN | 236 | 60.76  | 0.00 | 0.00 |
| 237 | B:ASN | 237 | 68.72  | 0.00 | 0.00 |
| 238 | B:ALA | 238 | 15.18  | 0.00 | 0.00 |
| 239 | B:GLU | 239 | 120.70 | 0.00 | 0.00 |
| 240 | B:ARG | 240 | 102.53 | 0.00 | 0.00 |
| 241 | B:LEU | 241 | 6.84   | 0.00 | 0.00 |
| 242 | B:VAL | 242 | 4.07   | 0.00 | 0.00 |
| 243 | B:GLU | 243 | 99.22  | 0.00 | 0.00 |
| 244 | B:PHE | 244 | 34.93  | 0.00 | 0.00 |
| 245 | B:GLY | 245 | 16.83  | 0.00 | 0.00 |
| 246 | B:ALA | 246 | 91.45  | 0.00 | 0.00 |
| 247 | B:PRO | 247 | 32.82  | 0.00 | 0.00 |
| 248 | B:HIS | 248 | 122.22 | 0.00 | 0.00 |
| 249 | B:ALA | 249 | 27.13  | 0.00 | 0.00 |
| 250 | B:VAL | 250 | 76.20  | 0.00 | 0.00 |
| 251 | B:LYS | 251 | 131.22 | 0.00 | 0.00 |
| 252 | B:MET | 252 | 19.74  | 0.00 | 0.00 |
| 253 | B:ASP | 253 | 61.71  | 0.00 | 0.00 |
| 254 | B:VAL | 254 | 43.18  | 0.00 | 0.00 |
| 255 | B:TYR | 255 | 117.45 | 0.00 | 0.00 |
| 256 | B:ASN | 256 | 69.90  | 0.00 | 0.00 |
| 257 | B:LEU | 257 | 94.79  | 0.00 | 0.00 |
| 258 | B:GLY | 258 | 24.65  | 0.00 | 0.00 |
| 259 | B:ASP | 259 | 59.91  | 0.00 | 0.00 |
| 260 | B:GLN | 260 | 37.12  | 0.00 | 0.00 |
| 261 | B:THR | 261 | 34.99  | 0.00 | 0.00 |
| 262 | B:GLY | 262 | 55.92  | 0.00 | 0.00 |
| 263 | B:VAL | 263 | 100.92 | 0.00 | 0.00 |
| 264 | B:LEU | 264 | 14.32  | 0.00 | 0.00 |
| 265 | B:LEU | 265 | 53.67  | 0.00 | 0.00 |
| 266 | B:LYS | 266 | 161.26 | 0.00 | 0.00 |
| 267 | B:ALA | 267 | 64.99  | 0.00 | 0.00 |
| 268 | B:LEU | 268 | 5.89   | 0.00 | 0.00 |
| 269 | B:ALA | 269 | 87.04  | 0.00 | 0.00 |
| 270 | B:GLY | 270 | 76.19  | 0.00 | 0.00 |
| 271 | B:VAL | 271 | 42.49  | 0.00 | 0.00 |
| 272 | B:PRO | 272 | 68.06  | 0.00 | 0.00 |
| 273 | B:VAL | 273 | 75.39  | 0.00 | 0.00 |
| 274 | B:ALA | 274 | 1.15   | 0.00 | 0.00 |
| 275 | B:HIS | 275 | 73.72  | 0.00 | 0.00 |
| 276 | B:ILE | 276 | 12.58  | 0.00 | 0.00 |
| 277 | B:GLU | 277 | 104.42 | 0.00 | 0.00 |
| 278 | B:GLY | 278 | 51.76  | 0.00 | 0.00 |
| 279 | B:THR | 279 | 72.56  | 0.00 | 0.00 |
| 280 | B:LYS | 280 | 64.90  | 0.00 | 0.00 |
| 281 | B:TYR | 281 | 22.54  | 0.00 | 0.00 |

|     |       |     |        |      |      |
|-----|-------|-----|--------|------|------|
| 282 | B:HIS | 282 | 24.77  | 0.00 | 0.00 |
| 283 | B:LEU | 283 | 2.69   | 0.00 | 0.00 |
| 284 | B:LYS | 284 | 119.43 | 0.00 | 0.00 |
| 285 | B:SER | 285 | 52.89  | 0.00 | 0.00 |
| 286 | B:GLY | 286 | 15.48  | 0.00 | 0.00 |
| 287 | B:HIS | 287 | 28.81  | 0.00 | 0.00 |
| 288 | B:VAL | 288 | 1.84   | 0.00 | 0.00 |
| 289 | B:THR | 289 | 22.84  | 0.00 | 0.00 |
| 290 | B:CYS | 290 | 2.99   | 0.00 | 0.00 |
| 291 | B:GLU | 291 | 55.77  | 0.00 | 0.00 |
| 292 | B:VAL | 292 | 0.99   | 0.00 | 0.00 |
| 293 | B:GLY | 293 | 10.72  | 0.00 | 0.00 |
| 294 | B:LEU | 294 | 12.17  | 0.00 | 0.00 |
| 295 | B:GLU | 295 | 121.57 | 0.00 | 0.00 |
| 296 | B:LYS | 296 | 140.33 | 0.00 | 0.00 |
| 297 | B:LEU | 297 | 9.60   | 0.00 | 0.00 |
| 298 | B:LYS | 298 | 123.85 | 0.00 | 0.00 |
| 299 | B:MET | 299 | 48.56  | 0.00 | 0.00 |
| 300 | B:LYS | 300 | 56.61  | 0.00 | 0.00 |
| 301 | B:GLY | 301 | 15.32  | 0.00 | 0.00 |
| 302 | B:LEU | 302 | 97.49  | 0.00 | 0.00 |
| 303 | B:THR | 303 | 129.80 | 0.00 | 0.00 |
| 304 | B:TYR | 304 | 75.60  | 0.00 | 0.00 |
| 305 | B:THR | 305 | 103.57 | 0.00 | 0.00 |
| 306 | B:MET | 306 | 123.11 | 0.00 | 0.00 |
| 307 | B:CYS | 307 | 9.02   | 0.00 | 0.00 |
| 308 | B:ASP | 308 | 66.38  | 0.00 | 0.00 |
| 309 | B:LYS | 309 | 114.69 | 0.00 | 0.00 |
| 310 | B:THR | 310 | 93.77  | 0.00 | 0.00 |
| 311 | B:LYS | 311 | 91.38  | 0.00 | 0.00 |
| 312 | B:PHE | 312 | 11.54  | 0.00 | 0.00 |
| 313 | B:THR | 313 | 69.77  | 0.00 | 0.00 |
| 314 | B:TRP | 314 | 53.43  | 0.00 | 0.00 |
| 315 | B:LYS | 315 | 136.69 | 0.00 | 0.00 |
| 316 | B:ARG | 316 | 150.20 | 0.00 | 0.00 |
| 317 | B:ALA | 317 | 50.59  | 0.00 | 0.00 |
| 318 | B:PRO | 318 | 7.48   | 0.00 | 0.00 |
| 319 | B:THR | 319 | 72.06  | 0.00 | 0.00 |
| 320 | B:ASP | 320 | 66.32  | 0.00 | 0.00 |
| 321 | B:SER | 321 | 37.47  | 0.00 | 0.00 |
| 322 | B:GLY | 322 | 63.67  | 0.00 | 0.00 |
| 323 | B:HIS | 323 | 37.82  | 0.00 | 0.00 |
| 324 | B:ASP | 324 | 58.99  | 0.00 | 0.00 |
| 325 | B:THR | 325 | 2.57   | 0.00 | 0.00 |
| 326 | B:VAL | 326 | 1.18   | 0.00 | 0.00 |
| 327 | B:VAL | 327 | 30.97  | 0.00 | 0.00 |
| 328 | B:MET | 328 | 3.81   | 0.00 | 0.00 |
| 329 | B:GLU | 329 | 23.93  | 0.00 | 0.00 |
| 330 | B:VAL | 330 | 5.94   | 0.00 | 0.00 |
| 331 | B:THR | 331 | 59.84  | 0.00 | 0.00 |
| 332 | B:PHE | 332 | 17.44  | 0.00 | 0.00 |
| 333 | B:SER | 333 | 88.83  | 0.00 | 0.00 |
| 334 | B:GLY | 334 | 17.04  | 0.00 | 0.00 |
| 335 | B:THR | 335 | 116.38 | 0.00 | 0.00 |
| 336 | B:LYS | 336 | 81.15  | 0.00 | 0.00 |
| 337 | B:PRO | 337 | 64.97  | 0.00 | 0.00 |
| 338 | B:CYS | 338 | 4.68   | 0.00 | 0.00 |
| 339 | B:ARG | 339 | 76.69  | 0.00 | 0.00 |
| 340 | B:ILE | 340 | 6.74   | 0.00 | 0.00 |
| 341 | B:PRO | 341 | 32.53  | 0.00 | 0.00 |
| 342 | B:VAL | 342 | 17.49  | 0.00 | 0.00 |
| 343 | B:ARG | 343 | 86.65  | 0.00 | 0.00 |
| 344 | B:ALA | 344 | 0.00   | 0.00 | 0.00 |
| 345 | B:VAL | 345 | 15.86  | 0.00 | 0.00 |
| 346 | B:ALA | 346 | 27.11  | 0.00 | 0.00 |
| 347 | B:HIS | 347 | 144.76 | 0.00 | 0.00 |
| 348 | B:GLY | 348 | 74.77  | 0.00 | 0.00 |
| 349 | B:SER | 349 | 59.80  | 0.00 | 0.00 |
| 350 | B:PRO | 350 | 115.21 | 0.00 | 0.00 |

|     |       |     |        |       |       |
|-----|-------|-----|--------|-------|-------|
| 351 | B:ASP | 351 | 85.07  | 0.00  | 0.00  |
| 352 | B:VAL | 352 | 90.82  | 0.00  | 0.00  |
| 353 | B:ASN | 353 | 80.15  | 0.00  | 0.00  |
| 354 | B:VAL | 354 | 52.10  | 0.00  | 0.00  |
| 355 | B:ALA | 355 | 16.65  | 0.00  | 0.00  |
| 356 | B:MET | 356 | 134.44 | 0.00  | 0.00  |
| 357 | B:LEU | 357 | 59.91  | 0.00  | 0.00  |
| 358 | B:ILE | 358 | 25.89  | 0.00  | 0.00  |
| 359 | B:THR | 359 | 5.36   | 0.00  | 0.00  |
| 360 | B:PRO | 360 | 40.55  | 0.00  | 0.00  |
| 361 | B:ASN | 361 | 38.07  | 0.00  | 0.00  |
| 362 | B:PRO | 362 | 11.88  | 0.00  | 0.00  |
| 363 | B:THR | 363 | 16.12  | 0.00  | 0.00  |
| 364 | B:ILE | 364 | 10.74  | 0.00  | 0.00  |
| 365 | B:GLU | 365 | 45.26  | 0.00  | 0.00  |
| 366 | B:ASN | 366 | 112.77 | 0.00  | 0.00  |
| 367 | B:ASN | 367 | 161.27 | 0.00  | 0.00  |
| 368 | B:GLY | 368 | 29.38  | 0.00  | 0.00  |
| 369 | B:GLY | 369 | 30.86  | 0.00  | 0.00  |
| 370 | B:GLY | 370 | 2.16   | 0.00  | 0.00  |
| 371 | B:PHE | 371 | 17.00  | 0.00  | 0.00  |
| 372 | B:ILE | 372 | 0.50   | 0.00  | 0.00  |
| 373 | B:GLU | 373 | 0.99   | 0.00  | 0.00  |
| 374 | B:MET | 374 | 1.32   | 0.00  | 0.00  |
| 375 | B:GLN | 375 | 53.70  | 0.00  | 0.00  |
| 376 | B:LEU | 376 | 4.26   | 0.00  | 0.00  |
| 377 | B:PRO | 377 | 40.59  | 0.00  | 0.00  |
| 378 | B:PRO | 378 | 50.59  | 0.00  | 0.00  |
| 379 | B:GLY | 379 | 25.23  | 0.00  | 0.00  |
| 380 | B:ASP | 380 | 71.04  | 0.00  | 0.00  |
| 381 | B:ASN | 381 | 1.62   | 0.00  | 0.00  |
| 382 | B:ILE | 382 | 56.68  | 0.00  | 0.00  |
| 383 | B:ILE | 383 | 0.50   | 0.00  | 0.00  |
| 384 | B:TYR | 384 | 63.45  | 0.00  | 0.00  |
| 385 | B:VAL | 385 | 0.00   | 0.00  | 0.00  |
| 386 | B:GLY | 386 | 11.22  | 0.00  | 0.00  |
| 387 | B:GLU | 387 | 126.03 | 0.00  | 0.00  |
| 388 | B:LEU | 388 | 49.43  | 0.00  | 0.00  |
| 389 | B:SER | 389 | 49.28  | 0.00  | 0.00  |
| 390 | B:HIS | 390 | 61.92  | 0.00  | 0.00  |
| 391 | B:GLN | 391 | 127.30 | 0.00  | 0.00  |
| 392 | B:TRP | 392 | 36.38  | 0.00  | 0.00  |
| 393 | B:PHE | 393 | 135.35 | 0.00  | 0.00  |
| 394 | B:GLN | 394 | 10.28  | 0.00  | 0.00  |
| 395 | B:LYS | 395 | 133.81 | 0.00  | 0.00  |
| 396 | B:GLY | 396 | 61.47  | 0.00  | 0.00  |
| 397 | B:SER | 397 | 55.71  | 0.00  | 0.00  |
| 398 | B:SER | 398 | 70.64  | 0.00  | 0.00  |
| 399 | B:ILE | 399 | 138.48 | 0.00  | 0.00  |
| 400 | B:GLY | 400 | 36.06  | 0.00  | 0.00  |
| 401 | B:ARG | 401 | 60.11  | 0.00  | 0.00  |
| 402 | B:VAL | 402 | 91.08  | 0.00  | 0.00  |
| 403 | B:PHE | 403 | 138.16 | 0.00  | 0.00  |
| 404 | B:GLN | 404 | 84.90  | 0.00  | 0.00  |
| 405 | B:LYS | 405 | 143.70 | 0.00  | 0.00  |
| 406 | B:THR | 406 | 73.98  | 0.00  | 0.00  |
| 407 | B:LYS | 407 | 111.39 | 0.00  | 0.00  |
| 408 | B:LYS | 408 | 66.82  | 0.00  | 0.00  |
| 409 | B:GLY | 409 | 32.84  | 0.00  | 0.00  |
| 410 | B:ILE | 410 | 107.28 | 15.90 | 0.25  |
| 411 | B:GLU | 411 | 107.81 | 0.00  | 0.00  |
| 412 | B:ARG | 412 | 43.34  | 0.00  | 0.00  |
| 413 | B:LEU | 413 | 55.39  | 28.00 | 0.40  |
| 414 | B:THR | 414 | 66.49  | 37.59 | 0.15  |
| 415 | B:VAL | 415 | 98.46  | 14.68 | -0.16 |
| 416 | B:ILE | 416 | 17.51  | 3.30  | 0.04  |
| 417 | B:GLY | 417 | 19.64  | 19.64 | 0.29  |
| 418 | B:GLU | 418 | 59.53  | 6.51  | -0.07 |
| 419 | B:HIS | 419 | 45.77  | 0.00  | 0.00  |

|     |       |     |        |       |       |
|-----|-------|-----|--------|-------|-------|
| 420 | B:ALA | 420 | 14.57  | 0.00  | 0.00  |
| 421 | B:TRP | 421 | 90.12  | 14.77 | 0.24  |
| 422 | B:ASP | 422 | 27.28  | 0.00  | 0.00  |
| 423 | B:PHE | 423 | 39.69  | 0.00  | 0.00  |
| 424 | B:GLY | 424 | 30.50  | 0.00  | 0.00  |
| 425 | B:SER | 425 | 29.41  | 0.00  | 0.00  |
| 426 | B:ALA | 426 | 106.61 | 0.00  | 0.00  |
| 427 | B:GLY | 427 | 46.17  | 0.00  | 0.00  |
| 428 | B:GLY | 428 | 53.59  | 0.00  | 0.00  |
| 429 | B:PHE | 429 | 167.72 | 0.00  | 0.00  |
| 430 | B:LEU | 430 | 146.32 | 0.00  | 0.00  |
| 431 | B:SER | 431 | 14.03  | 0.00  | 0.00  |
| 432 | B:SER | 432 | 65.78  | 0.00  | 0.00  |
| 433 | B:ILE | 433 | 80.16  | 0.00  | 0.00  |
| 434 | B:GLY | 434 | 12.11  | 1.24  | -0.00 |
| 435 | B:LYS | 435 | 71.52  | 0.00  | 0.00  |
| 436 | B:ALA | 436 | 50.68  | 0.00  | 0.00  |
| 437 | B:VAL | 437 | 87.38  | 13.23 | 0.21  |
| 438 | B:HIS | 438 | 54.99  | 52.09 | 0.70  |
| 439 | B:THR | 439 | 64.18  | 0.00  | 0.00  |
| 440 | B:VAL | 440 | 103.08 | 0.00  | 0.00  |
| 441 | B:LEU | 441 | 84.63  | 16.15 | 0.26  |
| 442 | B:GLY | 442 | 27.86  | 12.77 | 0.20  |
| 443 | B:GLY | 443 | 39.09  | 0.00  | 0.00  |
| 444 | B:ALA | 444 | 57.91  | 0.00  | 0.00  |
| 445 | B:PHE | 445 | 40.43  | 1.87  | 0.03  |
| 446 | B:ASN | 446 | 101.94 | 1.59  | 0.02  |
| 447 | B:SER | 447 | 90.99  | 0.00  | 0.00  |
| 448 | B:ILE | 448 | 111.28 | 0.00  | 0.00  |
| 449 | B:PHE | 449 | 36.26  | 0.00  | 0.00  |
| 450 | B:GLY | 450 | 48.58  | 0.00  | 0.00  |
| 451 | B:GLY | 451 | 90.34  | 0.00  | 0.00  |
| 452 | B:VAL | 452 | 63.68  | 0.00  | 0.00  |
| 453 | B:GLY | 453 | 34.37  | 0.00  | 0.00  |
| 454 | B:PHE | 454 | 138.29 | 0.00  | 0.00  |
| 455 | B:LEU | 455 | 108.88 | 0.00  | 0.00  |
| 456 | B:PRO | 456 | 53.43  | 0.00  | 0.00  |
| 457 | B:LYS | 457 | 32.97  | 0.00  | 0.00  |
| 458 | B:LEU | 458 | 57.56  | 0.00  | 0.00  |
| 459 | B:LEU | 459 | 112.68 | 0.00  | 0.00  |
| 460 | B:LEU | 460 | 83.58  | 0.00  | 0.00  |
| 461 | B:GLY | 461 | 0.00   | 0.00  | 0.00  |
| 462 | B:VAL | 462 | 88.05  | 0.00  | 0.00  |
| 463 | B:ALA | 463 | 48.01  | 0.00  | 0.00  |
| 464 | B:LEU | 464 | 48.38  | 0.00  | 0.00  |
| 465 | B:ALA | 465 | 32.39  | 0.00  | 0.00  |
| 466 | B:TRP | 466 | 156.33 | 0.00  | 0.00  |
| 467 | B:LEU | 467 | 69.67  | 0.00  | 0.00  |
| 468 | B:GLY | 468 | 0.00   | 0.00  | 0.00  |
| 469 | B:LEU | 469 | 138.86 | 0.00  | 0.00  |
| 470 | B:ASN | 470 | 96.11  | 0.00  | 0.00  |
| 471 | B:MET | 471 | 45.09  | 0.00  | 0.00  |
| 472 | B:ARG | 472 | 213.35 | 0.00  | 0.00  |
| 473 | B:ASN | 473 | 52.02  | 0.00  | 0.00  |
| 474 | B:PRO | 474 | 109.58 | 0.00  | 0.00  |
| 475 | B:THR | 475 | 96.15  | 0.00  | 0.00  |
| 476 | B:MET | 476 | 90.31  | 0.00  | 0.00  |
| 477 | B:SER | 477 | 16.45  | 0.00  | 0.00  |
| 478 | B:MET | 478 | 127.22 | 0.00  | 0.00  |
| 479 | B:SER | 479 | 58.68  | 0.00  | 0.00  |
| 480 | B:PHE | 480 | 58.08  | 0.00  | 0.00  |
| 481 | B:LEU | 481 | 52.52  | 0.00  | 0.00  |
| 482 | B:LEU | 482 | 115.16 | 0.00  | 0.00  |
| 483 | B:ALA | 483 | 42.73  | 0.00  | 0.00  |
| 484 | B:GLY | 484 | 0.00   | 0.00  | 0.00  |
| 485 | B:GLY | 485 | 35.34  | 0.00  | 0.00  |
| 486 | B:LEU | 486 | 68.85  | 0.00  | 0.00  |
| 487 | B:VAL | 487 | 2.96   | 0.00  | 0.00  |
| 488 | B:LEU | 488 | 49.93  | 0.00  | 0.00  |

|     |       |     |        |       |  |      |
|-----|-------|-----|--------|-------|--|------|
| 489 | B:ALA | 489 | 64.21  | 12.12 |  | 0.08 |
| 490 | B:MET | 490 | 63.51  | 50.08 |  | 1.22 |
| 491 | B:THR | 491 | 17.31  | 0.00  |  | 0.00 |
| 492 | B:LEU | 492 | 150.75 | 0.00  |  | 0.00 |
| 493 | B:GLY | 493 | 54.57  | 15.51 |  | 0.25 |
| 494 | B:VAL | 494 | 145.39 | 33.26 |  | 0.52 |

<< < > >>

PDBe PISA v1.52 [20/10/2014]

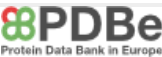

is a member of

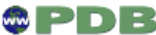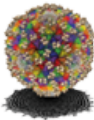

EMDataBank  
Unified Data Resource for 3DEM



Protein Data

PDBePISA

Bank

[pdbe.org/pisa](http://pdbe.org/pisa)

in Europe

Bringing Structure  
to Biology

Feedback

Share

Services

Research

Training

About us

www.PDB

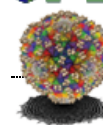

EMDataBank

Unified Data Resource for 3DEM

## PISA Interface.

Session Map (id=179-P6-IE2)

Start Interfaces Interface Search

Monomers

Assemblies

interface # 24 in ourmodelfortest2.pdb crystal.

Space symmetry group: P 1

interface #24/96

XML << < > >>

### Interface Summary

XML

View structure 1 interface structure 2

Download

structure 1 interface structure 2

This interface scored

**0.590**

in Complex Formation Significance Score (CSS).

CSS ranges from 0 to 1 as interface relevance to complex formation increases.

Achieved CSS implies that the interface plays an essential role in complex formation

|                                   | Structure 1 |         | Structure 2 |        |
|-----------------------------------|-------------|---------|-------------|--------|
| <u>Selection range</u>            | [CPL]C:500  |         | C           |        |
| class                             | Ligand      |         | Protein     |        |
| symmetry operation                | x,y,z       |         | x,y,z       |        |
| symmetry ID                       | 1_555       |         | 0_555       |        |
| <u>Number of atoms</u>            |             |         |             |        |
| interface                         | 26          | 92.9%   | 46          | 1.2%   |
| surface                           | 27          | 96.4%   | 2456        | 65.6%  |
| total                             | 28          | 100.0%  | 3746        | 100.0% |
| <u>Number of residues</u>         |             |         |             |        |
| interface                         | 1           | 100.0%  | 18          | 3.6%   |
| surface                           | 1           | 100.0%  | 488         | 98.8%  |
| total                             | 1           | 100.0%  | 494         | 100.0% |
| <u>Solvent-accessible area, Å</u> |             |         |             |        |
| interface                         | 363.5       | 54.9%   | 334.4       | 1.2%   |
| total                             | 661.8       | 100.0%  | 28155.3     | 100.0% |
| <u>Solvation energy, kcal/mol</u> |             |         |             |        |
| isolated structure                | 1.6         | 100.0%  | -443.9      | 100.0% |
| gain on complex formation         | -2.2        | -136.9% | -3.7        | 0.8%   |
| average gain                      | -1.5        | -96.3%  | -1.7        | 0.4%   |
| P-value                           | 0.454       |         | 0.187       |        |

No disulfide bonds found

No covalent bonds found

No hydrogen bonds found

No salt bridges found

### Interfacing residues (not a contact table)

XML

Display level: Residues

Inaccessible residues

HSDC

Residues making Hydrogen/Disulphide bond, Salt bridge or Covalent link

Solvent-accessible residues

Interfacing residues

ASA Accessible Surface Area, Å<sup>2</sup> BSA Buried Surface Area, Å<sup>2</sup> Δ<sup>i</sup>G Solvation energy effect, kcal/mol |||| Buried area percentage, one bar per 10%

| ## | Structure 1 | HSDC | ASA    | BSA    | Δ <sup>i</sup> G | ## | Structure 2 | HSDC | ASA   | BSA  | Δ <sup>i</sup> G |
|----|-------------|------|--------|--------|------------------|----|-------------|------|-------|------|------------------|
| 1  | C:CPL 500   |      | 661.85 | 363.53 | 2.17             | 1  | C:SER 1     |      | 10.29 | 0.00 | 0.00             |
|    |             |      |        |        |                  | 2  | C:ARG 2     |      | 74.07 | 0.00 | 0.00             |
|    |             |      |        |        |                  | 3  | C:CYS 3     |      | 0.00  | 0.00 | 0.00             |
|    |             |      |        |        |                  | 4  | C:THR 4     |      | 36.19 | 0.00 | 0.00             |
|    |             |      |        |        |                  | 5  | C:HIS 5     |      | 62.95 | 0.00 | 0.00             |

|    |       |    |        |      |      |
|----|-------|----|--------|------|------|
| 6  | C:LEU | 6  | 50.30  | 0.00 | 0.00 |
| 7  | C:GLU | 7  | 173.10 | 0.00 | 0.00 |
| 8  | C:ASN | 8  | 71.91  | 0.00 | 0.00 |
| 9  | C:ARG | 9  | 10.42  | 0.00 | 0.00 |
| 10 | C:ASP | 10 | 25.94  | 0.00 | 0.00 |
| 11 | C:PHE | 11 | 66.35  | 0.00 | 0.00 |
| 12 | C:VAL | 12 | 20.40  | 0.00 | 0.00 |
| 13 | C:THR | 13 | 102.91 | 0.00 | 0.00 |
| 14 | C:GLY | 14 | 17.76  | 0.00 | 0.00 |
| 15 | C:THR | 15 | 92.86  | 0.00 | 0.00 |
| 16 | C:GLN | 16 | 122.11 | 0.00 | 0.00 |
| 17 | C:GLY | 17 | 76.44  | 0.00 | 0.00 |
| 18 | C:THR | 18 | 56.60  | 0.00 | 0.00 |
| 19 | C:THR | 19 | 53.54  | 0.00 | 0.00 |
| 20 | C:ARG | 20 | 170.92 | 0.00 | 0.00 |
| 21 | C:VAL | 21 | 22.41  | 0.00 | 0.00 |
| 22 | C:THR | 22 | 20.38  | 0.00 | 0.00 |
| 23 | C:LEU | 23 | 1.84   | 0.00 | 0.00 |
| 24 | C:VAL | 24 | 1.72   | 0.00 | 0.00 |
| 25 | C:LEU | 25 | 3.52   | 0.00 | 0.00 |
| 26 | C:GLU | 26 | 48.04  | 0.00 | 0.00 |
| 27 | C:LEU | 27 | 31.70  | 0.00 | 0.00 |
| 28 | C:GLY | 28 | 56.10  | 0.00 | 0.00 |
| 29 | C:GLY | 29 | 8.90   | 0.00 | 0.00 |
| 30 | C:CYS | 30 | 6.26   | 0.00 | 0.00 |
| 31 | C:VAL | 31 | 7.87   | 0.00 | 0.00 |
| 32 | C:THR | 32 | 0.17   | 0.00 | 0.00 |
| 33 | C:ILE | 33 | 5.27   | 0.00 | 0.00 |
| 34 | C:THR | 34 | 34.29  | 0.00 | 0.00 |
| 35 | C:ALA | 35 | 9.84   | 0.00 | 0.00 |
| 36 | C:GLU | 36 | 147.14 | 0.00 | 0.00 |
| 37 | C:GLY | 37 | 36.26  | 0.00 | 0.00 |
| 38 | C:LYS | 38 | 55.88  | 0.00 | 0.00 |
| 39 | C:PRO | 39 | 3.54   | 0.00 | 0.00 |
| 40 | C:SER | 40 | 1.54   | 0.00 | 0.00 |
| 41 | C:MET | 41 | 1.00   | 0.00 | 0.00 |
| 42 | C:ASP | 42 | 0.00   | 0.00 | 0.00 |
| 43 | C:VAL | 43 | 2.17   | 0.00 | 0.00 |
| 44 | C:TRP | 44 | 8.77   | 0.00 | 0.00 |
| 45 | C:LEU | 45 | 3.36   | 0.00 | 0.00 |
| 46 | C:ASP | 46 | 59.00  | 0.00 | 0.00 |
| 47 | C:ALA | 47 | 16.81  | 0.00 | 0.00 |
| 48 | C:ILE | 48 | 0.34   | 0.00 | 0.00 |
| 49 | C:TYR | 49 | 41.84  | 0.00 | 0.00 |
| 50 | C:GLN | 50 | 4.34   | 0.00 | 0.00 |
| 51 | C:GLU | 51 | 91.85  | 0.00 | 0.00 |
| 52 | C:ASN | 52 | 102.69 | 0.00 | 0.00 |
| 53 | C:PRO | 53 | 13.15  | 0.00 | 0.00 |
| 54 | C:ALA | 54 | 54.43  | 0.00 | 0.00 |
| 55 | C:LYS | 55 | 112.86 | 0.00 | 0.00 |
| 56 | C:THR | 56 | 50.77  | 0.00 | 0.00 |
| 57 | C:ARG | 57 | 57.95  | 0.00 | 0.00 |
| 58 | C:GLU | 58 | 12.29  | 0.00 | 0.00 |
| 59 | C:TYR | 59 | 1.93   | 0.00 | 0.00 |
| 60 | C:CYS | 60 | 0.17   | 0.00 | 0.00 |
| 61 | C:LEU | 61 | 0.33   | 0.00 | 0.00 |
| 62 | C:HIS | 62 | 45.88  | 0.00 | 0.00 |
| 63 | C:ALA | 63 | 7.38   | 0.00 | 0.00 |
| 64 | C:LYS | 64 | 108.37 | 0.00 | 0.00 |
| 65 | C:LEU | 65 | 43.42  | 0.00 | 0.00 |
| 66 | C:SER | 66 | 55.99  | 0.00 | 0.00 |
| 67 | C:ASP | 67 | 99.59  | 0.00 | 0.00 |
| 68 | C:THR | 68 | 84.76  | 0.00 | 0.00 |
| 69 | C:LYS | 69 | 93.25  | 0.00 | 0.00 |
| 70 | C:VAL | 70 | 66.15  | 0.00 | 0.00 |
| 71 | C:ALA | 71 | 32.41  | 0.00 | 0.00 |
| 72 | C:ALA | 72 | 30.60  | 0.00 | 0.00 |
| 73 | C:ARG | 73 | 107.47 | 0.00 | 0.00 |
| 74 | C:CYS | 74 | 30.29  | 0.00 | 0.00 |

|     |       |     |        |      |      |
|-----|-------|-----|--------|------|------|
| 75  | C:PRO | 75  | 38.73  | 0.00 | 0.00 |
| 76  | C:THR | 76  | 94.73  | 0.00 | 0.00 |
| 77  | C:MET | 77  | 125.15 | 0.00 | 0.00 |
| 78  | C:GLY | 78  | 38.73  | 0.00 | 0.00 |
| 79  | C:PRO | 79  | 87.31  | 0.00 | 0.00 |
| 80  | C:ALA | 80  | 2.66   | 0.00 | 0.00 |
| 81  | C:THR | 81  | 95.74  | 0.00 | 0.00 |
| 82  | C:LEU | 82  | 33.34  | 0.00 | 0.00 |
| 83  | C:ALA | 83  | 81.53  | 0.00 | 0.00 |
| 84  | C:GLU | 84  | 32.25  | 0.00 | 0.00 |
| 85  | C:GLU | 85  | 50.27  | 0.00 | 0.00 |
| 86  | C:HIS | 86  | 168.30 | 0.00 | 0.00 |
| 87  | C:GLN | 87  | 126.91 | 0.00 | 0.00 |
| 88  | C:GLY | 88  | 49.47  | 0.00 | 0.00 |
| 89  | C:GLY | 89  | 22.15  | 0.00 | 0.00 |
| 90  | C:THR | 90  | 33.69  | 0.00 | 0.00 |
| 91  | C:VAL | 91  | 14.56  | 0.00 | 0.00 |
| 92  | C:CYS | 92  | 42.37  | 0.00 | 0.00 |
| 93  | C:LYS | 93  | 89.07  | 0.00 | 0.00 |
| 94  | C:ARG | 94  | 100.42 | 0.00 | 0.00 |
| 95  | C:ASP | 95  | 59.65  | 0.00 | 0.00 |
| 96  | C:GLN | 96  | 110.55 | 0.00 | 0.00 |
| 97  | C:SER | 97  | 3.53   | 0.00 | 0.00 |
| 98  | C:ASP | 98  | 97.06  | 0.00 | 0.00 |
| 99  | C:ARG | 99  | 31.02  | 0.00 | 0.00 |
| 100 | C:GLY | 100 | 3.68   | 0.00 | 0.00 |
| 101 | C:TRP | 101 | 185.19 | 0.00 | 0.00 |
| 102 | C:GLY | 102 | 69.86  | 0.00 | 0.00 |
| 103 | C:ASN | 103 | 51.54  | 0.00 | 0.00 |
| 104 | C:HIS | 104 | 174.45 | 0.00 | 0.00 |
| 105 | C:CYS | 105 | 10.24  | 0.00 | 0.00 |
| 106 | C:GLY | 106 | 62.13  | 0.00 | 0.00 |
| 107 | C:LEU | 107 | 94.61  | 0.00 | 0.00 |
| 108 | C:PHE | 108 | 142.39 | 0.00 | 0.00 |
| 109 | C:GLY | 109 | 33.05  | 0.00 | 0.00 |
| 110 | C:LYS | 110 | 125.61 | 0.00 | 0.00 |
| 111 | C:GLY | 111 | 6.72   | 0.00 | 0.00 |
| 112 | C:SER | 112 | 16.29  | 0.00 | 0.00 |
| 113 | C:ILE | 113 | 0.00   | 0.00 | 0.00 |
| 114 | C:VAL | 114 | 1.01   | 0.00 | 0.00 |
| 115 | C:ALA | 115 | 1.01   | 0.00 | 0.00 |
| 116 | C:CYS | 116 | 0.66   | 0.00 | 0.00 |
| 117 | C:VAL | 117 | 3.18   | 0.00 | 0.00 |
| 118 | C:LYS | 118 | 103.54 | 0.00 | 0.00 |
| 119 | C:ALA | 119 | 16.56  | 0.00 | 0.00 |
| 120 | C:ALA | 120 | 46.71  | 0.00 | 0.00 |
| 121 | C:CYS | 121 | 29.43  | 0.00 | 0.00 |
| 122 | C:GLU | 122 | 72.17  | 0.00 | 0.00 |
| 123 | C:ALA | 123 | 85.83  | 0.00 | 0.00 |
| 124 | C:LYS | 124 | 134.45 | 0.00 | 0.00 |
| 125 | C:LYS | 125 | 54.94  | 0.00 | 0.00 |
| 126 | C:LYS | 126 | 75.11  | 0.00 | 0.00 |
| 127 | C:ALA | 127 | 0.51   | 0.00 | 0.00 |
| 128 | C:THR | 128 | 21.19  | 0.00 | 0.00 |
| 129 | C:GLY | 129 | 0.00   | 0.00 | 0.00 |
| 130 | C:HIS | 130 | 5.13   | 0.00 | 0.00 |
| 131 | C:VAL | 131 | 42.27  | 0.00 | 0.00 |
| 132 | C:TYR | 132 | 16.66  | 0.00 | 0.00 |
| 133 | C:ASP | 133 | 56.11  | 0.00 | 0.00 |
| 134 | C:ALA | 134 | 44.73  | 0.00 | 0.00 |
| 135 | C:ASN | 135 | 112.13 | 0.00 | 0.00 |
| 136 | C:LYS | 136 | 127.79 | 0.00 | 0.00 |
| 137 | C:ILE | 137 | 0.51   | 0.00 | 0.00 |
| 138 | C:VAL | 138 | 27.33  | 0.00 | 0.00 |
| 139 | C:TYR | 139 | 1.24   | 0.00 | 0.00 |
| 140 | C:THR | 140 | 22.57  | 0.00 | 0.00 |
| 141 | C:VAL | 141 | 0.82   | 0.00 | 0.00 |
| 142 | C:LYS | 142 | 45.41  | 0.00 | 0.00 |
| 143 | C:VAL | 143 | 2.76   | 0.00 | 0.00 |



|     |       |     |        |      |      |
|-----|-------|-----|--------|------|------|
| 144 | C:GLU | 144 | 1.11   | 0.00 | 0.00 |
| 145 | C:PRO | 145 | 4.63   | 0.00 | 0.00 |
| 146 | C:HIS | 146 | 7.01   | 0.00 | 0.00 |
| 147 | C:THR | 147 | 55.75  | 0.00 | 0.00 |
| 148 | C:GLY | 148 | 15.03  | 0.00 | 0.00 |
| 149 | C:ASP | 149 | 55.31  | 0.00 | 0.00 |
| 150 | C:TYR | 150 | 78.29  | 0.00 | 0.00 |
| 151 | C:VAL | 151 | 41.66  | 0.00 | 0.00 |
| 152 | C:ALA | 152 | 60.84  | 0.00 | 0.00 |
| 153 | C:ALA | 153 | 86.84  | 0.00 | 0.00 |
| 154 | C:ASN | 154 | 143.30 | 0.00 | 0.00 |
| 155 | C:GLU | 155 | 90.84  | 0.00 | 0.00 |
| 156 | C:THR | 156 | 116.46 | 0.00 | 0.00 |
| 157 | C:HIS | 157 | 25.94  | 0.00 | 0.00 |
| 158 | C:SER | 158 | 112.66 | 0.00 | 0.00 |
| 159 | C:GLY | 159 | 19.92  | 0.00 | 0.00 |
| 160 | C:ARG | 160 | 71.26  | 0.00 | 0.00 |
| 161 | C:LYS | 161 | 78.14  | 0.00 | 0.00 |
| 162 | C:THR | 162 | 78.08  | 0.00 | 0.00 |
| 163 | C:ALA | 163 | 8.16   | 0.00 | 0.00 |
| 164 | C:SER | 164 | 76.70  | 0.00 | 0.00 |
| 165 | C:PHE | 165 | 2.49   | 0.00 | 0.00 |
| 166 | C:THR | 166 | 34.91  | 0.00 | 0.00 |
| 167 | C:VAL | 167 | 75.46  | 0.00 | 0.00 |
| 168 | C:SER | 168 | 102.15 | 0.00 | 0.00 |
| 169 | C:SER | 169 | 41.07  | 0.00 | 0.00 |
| 170 | C:GLU | 170 | 127.31 | 0.00 | 0.00 |
| 171 | C:LYS | 171 | 128.13 | 0.00 | 0.00 |
| 172 | C:THR | 172 | 48.75  | 0.00 | 0.00 |
| 173 | C:ILE | 173 | 100.28 | 0.00 | 0.00 |
| 174 | C:LEU | 174 | 17.98  | 0.00 | 0.00 |
| 175 | C:THR | 175 | 85.12  | 0.00 | 0.00 |
| 176 | C:MET | 176 | 9.50   | 0.00 | 0.00 |
| 177 | C:GLY | 177 | 60.59  | 0.00 | 0.00 |
| 178 | C:GLU | 178 | 114.47 | 0.00 | 0.00 |
| 179 | C:TYR | 179 | 21.75  | 0.00 | 0.00 |
| 180 | C:GLY | 180 | 11.21  | 0.00 | 0.00 |
| 181 | C:ASP | 181 | 45.69  | 0.00 | 0.00 |
| 182 | C:VAL | 182 | 1.96   | 0.00 | 0.00 |
| 183 | C:SER | 183 | 25.39  | 0.00 | 0.00 |
| 184 | C:LEU | 184 | 1.80   | 0.00 | 0.00 |
| 185 | C:LEU | 185 | 69.53  | 0.00 | 0.00 |
| 186 | C:CYS | 186 | 8.84   | 0.00 | 0.00 |
| 187 | C:ARG | 187 | 125.57 | 0.00 | 0.00 |
| 188 | C:VAL | 188 | 23.39  | 0.00 | 0.00 |
| 189 | C:ALA | 189 | 74.81  | 0.00 | 0.00 |
| 190 | C:SER | 190 | 28.61  | 0.00 | 0.00 |
| 191 | C:GLY | 191 | 14.11  | 0.00 | 0.00 |
| 192 | C:VAL | 192 | 27.81  | 0.00 | 0.00 |
| 193 | C:ASP | 193 | 87.85  | 0.00 | 0.00 |
| 194 | C:LEU | 194 | 23.57  | 0.00 | 0.00 |
| 195 | C:ALA | 195 | 67.56  | 0.00 | 0.00 |
| 196 | C:GLN | 196 | 67.55  | 0.00 | 0.00 |
| 197 | C:THR | 197 | 17.52  | 0.00 | 0.00 |
| 198 | C:VAL | 198 | 5.86   | 0.00 | 0.00 |
| 199 | C:ILE | 199 | 2.51   | 0.00 | 0.00 |
| 200 | C:LEU | 200 | 0.51   | 0.00 | 0.00 |
| 201 | C:GLU | 201 | 27.55  | 0.00 | 0.00 |
| 202 | C:LEU | 202 | 22.83  | 0.00 | 0.00 |
| 203 | C:ASP | 203 | 36.36  | 0.00 | 0.00 |
| 204 | C:LYS | 204 | 105.02 | 0.00 | 0.00 |
| 205 | C:THR | 205 | 105.48 | 0.00 | 0.00 |
| 206 | C:VAL | 206 | 65.05  | 0.00 | 0.00 |
| 207 | C:GLU | 207 | 142.94 | 0.00 | 0.00 |
| 208 | C:HIS | 208 | 168.31 | 0.00 | 0.00 |
| 209 | C:LEU | 209 | 71.14  | 0.00 | 0.00 |
| 210 | C:PRO | 210 | 52.54  | 0.00 | 0.00 |
| 211 | C:THR | 211 | 36.45  | 0.00 | 0.00 |
| 212 | C:ALA | 212 | 0.00   | 0.00 | 0.00 |

|     |       |     |        |      |      |
|-----|-------|-----|--------|------|------|
| 213 | C:TRP | 213 | 17.36  | 0.00 | 0.00 |
| 214 | C:GLN | 214 | 24.73  | 0.00 | 0.00 |
| 215 | C:VAL | 215 | 7.45   | 0.00 | 0.00 |
| 216 | C:HIS | 216 | 87.91  | 0.00 | 0.00 |
| 217 | C:ARG | 217 | 87.65  | 0.00 | 0.00 |
| 218 | C:ASP | 218 | 81.55  | 0.00 | 0.00 |
| 219 | C:TRP | 219 | 88.51  | 0.00 | 0.00 |
| 220 | C:PHE | 220 | 3.28   | 0.00 | 0.00 |
| 221 | C:ASN | 221 | 69.35  | 0.00 | 0.00 |
| 222 | C:ASP | 222 | 113.95 | 0.00 | 0.00 |
| 223 | C:LEU | 223 | 23.90  | 0.00 | 0.00 |
| 224 | C:ALA | 224 | 68.31  | 0.00 | 0.00 |
| 225 | C:LEU | 225 | 19.86  | 0.00 | 0.00 |
| 226 | C:PRO | 226 | 3.66   | 0.00 | 0.00 |
| 227 | C:TRP | 227 | 64.79  | 0.00 | 0.00 |
| 228 | C:LYS | 228 | 23.05  | 0.00 | 0.00 |
| 229 | C:HIS | 229 | 86.16  | 0.00 | 0.00 |
| 230 | C:GLU | 230 | 131.18 | 0.00 | 0.00 |
| 231 | C:GLY | 231 | 77.82  | 0.00 | 0.00 |
| 232 | C:ALA | 232 | 48.84  | 0.00 | 0.00 |
| 233 | C:GLN | 233 | 152.38 | 0.00 | 0.00 |
| 234 | C:ASN | 234 | 76.46  | 0.00 | 0.00 |
| 235 | C:TRP | 235 | 45.28  | 0.00 | 0.00 |
| 236 | C:ASN | 236 | 61.07  | 0.00 | 0.00 |
| 237 | C:ASN | 237 | 67.82  | 0.00 | 0.00 |
| 238 | C:ALA | 238 | 15.88  | 0.00 | 0.00 |
| 239 | C:GLU | 239 | 111.31 | 0.00 | 0.00 |
| 240 | C:ARG | 240 | 113.58 | 0.00 | 0.00 |
| 241 | C:LEU | 241 | 6.06   | 0.00 | 0.00 |
| 242 | C:VAL | 242 | 4.61   | 0.00 | 0.00 |
| 243 | C:GLU | 243 | 85.09  | 0.00 | 0.00 |
| 244 | C:PHE | 244 | 23.04  | 0.00 | 0.00 |
| 245 | C:GLY | 245 | 19.82  | 0.00 | 0.00 |
| 246 | C:ALA | 246 | 92.00  | 0.00 | 0.00 |
| 247 | C:PRO | 247 | 34.98  | 0.00 | 0.00 |
| 248 | C:HIS | 248 | 117.55 | 0.00 | 0.00 |
| 249 | C:ALA | 249 | 22.31  | 0.00 | 0.00 |
| 250 | C:VAL | 250 | 68.91  | 0.00 | 0.00 |
| 251 | C:LYS | 251 | 127.07 | 0.00 | 0.00 |
| 252 | C:MET | 252 | 19.93  | 0.00 | 0.00 |
| 253 | C:ASP | 253 | 67.40  | 0.00 | 0.00 |
| 254 | C:VAL | 254 | 40.04  | 0.00 | 0.00 |
| 255 | C:TYR | 255 | 113.32 | 0.00 | 0.00 |
| 256 | C:ASN | 256 | 67.09  | 0.00 | 0.00 |
| 257 | C:LEU | 257 | 104.87 | 0.00 | 0.00 |
| 258 | C:GLY | 258 | 19.80  | 0.00 | 0.00 |
| 259 | C:ASP | 259 | 73.79  | 0.00 | 0.00 |
| 260 | C:GLN | 260 | 36.21  | 0.00 | 0.00 |
| 261 | C:THR | 261 | 34.95  | 0.00 | 0.00 |
| 262 | C:GLY | 262 | 49.82  | 0.00 | 0.00 |
| 263 | C:VAL | 263 | 89.73  | 0.00 | 0.00 |
| 264 | C:LEU | 264 | 10.04  | 0.00 | 0.00 |
| 265 | C:LEU | 265 | 57.96  | 0.00 | 0.00 |
| 266 | C:LYS | 266 | 156.71 | 0.00 | 0.00 |
| 267 | C:ALA | 267 | 59.76  | 0.00 | 0.00 |
| 268 | C:LEU | 268 | 8.91   | 0.00 | 0.00 |
| 269 | C:ALA | 269 | 88.85  | 0.00 | 0.00 |
| 270 | C:GLY | 270 | 81.91  | 0.00 | 0.00 |
| 271 | C:VAL | 271 | 48.16  | 0.00 | 0.00 |
| 272 | C:PRO | 272 | 64.23  | 0.00 | 0.00 |
| 273 | C:VAL | 273 | 74.99  | 0.00 | 0.00 |
| 274 | C:ALA | 274 | 3.12   | 0.00 | 0.00 |
| 275 | C:HIS | 275 | 69.54  | 0.00 | 0.00 |
| 276 | C:ILE | 276 | 14.78  | 0.00 | 0.00 |
| 277 | C:GLU | 277 | 98.84  | 0.00 | 0.00 |
| 278 | C:GLY | 278 | 65.88  | 0.00 | 0.00 |
| 279 | C:THR | 279 | 69.43  | 0.00 | 0.00 |
| 280 | C:LYS | 280 | 71.79  | 0.00 | 0.00 |
| 281 | C:TYR | 281 | 19.37  | 0.00 | 0.00 |

|     |       |     |        |      |      |
|-----|-------|-----|--------|------|------|
| 282 | C:HIS | 282 | 23.38  | 0.00 | 0.00 |
| 283 | C:LEU | 283 | 1.97   | 0.00 | 0.00 |
| 284 | C:LYS | 284 | 109.81 | 0.00 | 0.00 |
| 285 | C:SER | 285 | 49.18  | 0.00 | 0.00 |
| 286 | C:GLY | 286 | 16.84  | 0.00 | 0.00 |
| 287 | C:HIS | 287 | 27.22  | 0.00 | 0.00 |
| 288 | C:VAL | 288 | 1.68   | 0.00 | 0.00 |
| 289 | C:THR | 289 | 4.50   | 0.00 | 0.00 |
| 290 | C:CYS | 290 | 2.16   | 0.00 | 0.00 |
| 291 | C:GLU | 291 | 74.55  | 0.00 | 0.00 |
| 292 | C:VAL | 292 | 2.50   | 0.00 | 0.00 |
| 293 | C:GLY | 293 | 14.29  | 0.00 | 0.00 |
| 294 | C:LEU | 294 | 11.78  | 0.00 | 0.00 |
| 295 | C:GLU | 295 | 92.54  | 0.00 | 0.00 |
| 296 | C:LYS | 296 | 167.24 | 0.00 | 0.00 |
| 297 | C:LEU | 297 | 9.49   | 0.00 | 0.00 |
| 298 | C:LYS | 298 | 124.88 | 0.00 | 0.00 |
| 299 | C:MET | 299 | 52.35  | 0.00 | 0.00 |
| 300 | C:LYS | 300 | 45.49  | 0.00 | 0.00 |
| 301 | C:GLY | 301 | 15.87  | 0.00 | 0.00 |
| 302 | C:LEU | 302 | 108.95 | 0.00 | 0.00 |
| 303 | C:THR | 303 | 135.04 | 0.00 | 0.00 |
| 304 | C:TYR | 304 | 71.88  | 0.00 | 0.00 |
| 305 | C:THR | 305 | 99.62  | 0.00 | 0.00 |
| 306 | C:MET | 306 | 110.71 | 0.00 | 0.00 |
| 307 | C:CYS | 307 | 13.66  | 0.00 | 0.00 |
| 308 | C:ASP | 308 | 64.31  | 0.00 | 0.00 |
| 309 | C:LYS | 309 | 116.23 | 0.00 | 0.00 |
| 310 | C:THR | 310 | 84.41  | 0.00 | 0.00 |
| 311 | C:LYS | 311 | 93.37  | 0.00 | 0.00 |
| 312 | C:PHE | 312 | 15.13  | 0.00 | 0.00 |
| 313 | C:THR | 313 | 68.55  | 0.00 | 0.00 |
| 314 | C:TRP | 314 | 55.55  | 0.00 | 0.00 |
| 315 | C:LYS | 315 | 136.35 | 0.00 | 0.00 |
| 316 | C:ARG | 316 | 161.64 | 0.00 | 0.00 |
| 317 | C:ALA | 317 | 53.45  | 0.00 | 0.00 |
| 318 | C:PRO | 318 | 11.04  | 0.00 | 0.00 |
| 319 | C:THR | 319 | 77.83  | 0.00 | 0.00 |
| 320 | C:ASP | 320 | 81.33  | 0.00 | 0.00 |
| 321 | C:SER | 321 | 18.45  | 0.00 | 0.00 |
| 322 | C:GLY | 322 | 75.56  | 0.00 | 0.00 |
| 323 | C:HIS | 323 | 38.70  | 0.00 | 0.00 |
| 324 | C:ASP | 324 | 46.35  | 0.00 | 0.00 |
| 325 | C:THR | 325 | 3.03   | 0.00 | 0.00 |
| 326 | C:VAL | 326 | 1.01   | 0.00 | 0.00 |
| 327 | C:VAL | 327 | 25.41  | 0.00 | 0.00 |
| 328 | C:MET | 328 | 1.96   | 0.00 | 0.00 |
| 329 | C:GLU | 329 | 30.06  | 0.00 | 0.00 |
| 330 | C:VAL | 330 | 2.66   | 0.00 | 0.00 |
| 331 | C:THR | 331 | 55.87  | 0.00 | 0.00 |
| 332 | C:PHE | 332 | 7.65   | 0.00 | 0.00 |
| 333 | C:SER | 333 | 78.00  | 0.00 | 0.00 |
| 334 | C:GLY | 334 | 20.44  | 0.00 | 0.00 |
| 335 | C:THR | 335 | 119.67 | 0.00 | 0.00 |
| 336 | C:LYS | 336 | 83.73  | 0.00 | 0.00 |
| 337 | C:PRO | 337 | 57.90  | 0.00 | 0.00 |
| 338 | C:CYS | 338 | 2.51   | 0.00 | 0.00 |
| 339 | C:ARG | 339 | 67.72  | 0.00 | 0.00 |
| 340 | C:ILE | 340 | 13.20  | 0.00 | 0.00 |
| 341 | C:PRO | 341 | 28.55  | 0.00 | 0.00 |
| 342 | C:VAL | 342 | 22.03  | 0.00 | 0.00 |
| 343 | C:ARG | 343 | 118.13 | 0.00 | 0.00 |
| 344 | C:ALA | 344 | 1.05   | 0.00 | 0.00 |
| 345 | C:VAL | 345 | 15.06  | 0.00 | 0.00 |
| 346 | C:ALA | 346 | 34.04  | 0.00 | 0.00 |
| 347 | C:HIS | 347 | 118.04 | 0.00 | 0.00 |
| 348 | C:GLY | 348 | 77.71  | 0.00 | 0.00 |
| 349 | C:SER | 349 | 52.77  | 0.00 | 0.00 |
| 350 | C:PRO | 350 | 121.49 | 0.00 | 0.00 |

|     |       |     |        |       |       |
|-----|-------|-----|--------|-------|-------|
| 351 | C:ASP | 351 | 115.55 | 0.00  | 0.00  |
| 352 | C:VAL | 352 | 99.12  | 0.00  | 0.00  |
| 353 | C:ASN | 353 | 92.20  | 0.00  | 0.00  |
| 354 | C:VAL | 354 | 37.86  | 0.00  | 0.00  |
| 355 | C:ALA | 355 | 14.23  | 0.00  | 0.00  |
| 356 | C:MET | 356 | 125.22 | 0.00  | 0.00  |
| 357 | C:LEU | 357 | 65.02  | 0.00  | 0.00  |
| 358 | C:ILE | 358 | 21.06  | 0.00  | 0.00  |
| 359 | C:THR | 359 | 9.45   | 0.00  | 0.00  |
| 360 | C:PRO | 360 | 50.04  | 0.00  | 0.00  |
| 361 | C:ASN | 361 | 49.59  | 0.00  | 0.00  |
| 362 | C:PRO | 362 | 16.05  | 0.00  | 0.00  |
| 363 | C:THR | 363 | 28.50  | 0.00  | 0.00  |
| 364 | C:ILE | 364 | 6.38   | 0.00  | 0.00  |
| 365 | C:GLU | 365 | 47.42  | 0.00  | 0.00  |
| 366 | C:ASN | 366 | 118.66 | 0.00  | 0.00  |
| 367 | C:ASN | 367 | 139.30 | 0.00  | 0.00  |
| 368 | C:GLY | 368 | 35.01  | 0.00  | 0.00  |
| 369 | C:GLY | 369 | 36.90  | 0.00  | 0.00  |
| 370 | C:GLY | 370 | 4.35   | 0.00  | 0.00  |
| 371 | C:PHE | 371 | 13.14  | 0.00  | 0.00  |
| 372 | C:ILE | 372 | 0.49   | 0.00  | 0.00  |
| 373 | C:GLU | 373 | 0.83   | 0.00  | 0.00  |
| 374 | C:MET | 374 | 0.00   | 0.00  | 0.00  |
| 375 | C:GLN | 375 | 59.93  | 0.00  | 0.00  |
| 376 | C:LEU | 376 | 5.25   | 0.00  | 0.00  |
| 377 | C:PRO | 377 | 46.71  | 0.00  | 0.00  |
| 378 | C:PRO | 378 | 53.28  | 0.00  | 0.00  |
| 379 | C:GLY | 379 | 23.97  | 0.00  | 0.00  |
| 380 | C:ASP | 380 | 66.12  | 0.00  | 0.00  |
| 381 | C:ASN | 381 | 2.04   | 0.00  | 0.00  |
| 382 | C:ILE | 382 | 33.67  | 0.00  | 0.00  |
| 383 | C:ILE | 383 | 0.12   | 0.00  | 0.00  |
| 384 | C:TYR | 384 | 55.02  | 0.00  | 0.00  |
| 385 | C:VAL | 385 | 0.15   | 0.00  | 0.00  |
| 386 | C:GLY | 386 | 21.00  | 0.00  | 0.00  |
| 387 | C:GLU | 387 | 113.88 | 0.00  | 0.00  |
| 388 | C:LEU | 388 | 39.42  | 0.00  | 0.00  |
| 389 | C:SER | 389 | 51.25  | 0.00  | 0.00  |
| 390 | C:HIS | 390 | 59.87  | 0.00  | 0.00  |
| 391 | C:GLN | 391 | 106.66 | 0.00  | 0.00  |
| 392 | C:TRP | 392 | 38.31  | 0.00  | 0.00  |
| 393 | C:PHE | 393 | 136.80 | 0.00  | 0.00  |
| 394 | C:GLN | 394 | 12.91  | 0.00  | 0.00  |
| 395 | C:LYS | 395 | 152.01 | 0.00  | 0.00  |
| 396 | C:GLY | 396 | 65.42  | 0.00  | 0.00  |
| 397 | C:SER | 397 | 51.66  | 0.00  | 0.00  |
| 398 | C:SER | 398 | 72.56  | 0.00  | 0.00  |
| 399 | C:ILE | 399 | 141.96 | 0.00  | 0.00  |
| 400 | C:GLY | 400 | 32.78  | 0.00  | 0.00  |
| 401 | C:ARG | 401 | 54.48  | 0.00  | 0.00  |
| 402 | C:VAL | 402 | 101.34 | 0.00  | 0.00  |
| 403 | C:PHE | 403 | 126.89 | 0.00  | 0.00  |
| 404 | C:GLN | 404 | 112.30 | 0.00  | 0.00  |
| 405 | C:LYS | 405 | 152.17 | 0.00  | 0.00  |
| 406 | C:THR | 406 | 74.93  | 0.00  | 0.00  |
| 407 | C:LYS | 407 | 117.54 | 0.00  | 0.00  |
| 408 | C:LYS | 408 | 69.45  | 0.00  | 0.00  |
| 409 | C:GLY | 409 | 30.14  | 0.00  | 0.00  |
| 410 | C:ILE | 410 | 105.16 | 18.59 | 0.30  |
| 411 | C:GLU | 411 | 109.48 | 0.00  | 0.00  |
| 412 | C:ARG | 412 | 45.73  | 0.00  | 0.00  |
| 413 | C:LEU | 413 | 55.54  | 36.89 | 0.56  |
| 414 | C:THR | 414 | 65.22  | 34.96 | -0.12 |
| 415 | C:VAL | 415 | 108.39 | 14.36 | -0.16 |
| 416 | C:ILE | 416 | 20.10  | 8.51  | -0.03 |
| 417 | C:GLY | 417 | 19.39  | 19.39 | 0.31  |
| 418 | C:GLU | 418 | 62.99  | 0.87  | -0.01 |
| 419 | C:HIS | 419 | 43.24  | 0.00  | 0.00  |

|     |       |     |        |       |       |
|-----|-------|-----|--------|-------|-------|
| 420 | C:ALA | 420 | 18.12  | 0.00  | 0.00  |
| 421 | C:TRP | 421 | 80.05  | 16.06 | 0.26  |
| 422 | C:ASP | 422 | 19.42  | 0.00  | 0.00  |
| 423 | C:PHE | 423 | 37.05  | 0.00  | 0.00  |
| 424 | C:GLY | 424 | 35.06  | 0.00  | 0.00  |
| 425 | C:SER | 425 | 22.09  | 0.00  | 0.00  |
| 426 | C:ALA | 426 | 97.96  | 0.00  | 0.00  |
| 427 | C:GLY | 427 | 56.18  | 0.00  | 0.00  |
| 428 | C:GLY | 428 | 51.37  | 0.00  | 0.00  |
| 429 | C:PHE | 429 | 173.97 | 0.00  | 0.00  |
| 430 | C:LEU | 430 | 144.44 | 0.00  | 0.00  |
| 431 | C:SER | 431 | 23.85  | 0.00  | 0.00  |
| 432 | C:SER | 432 | 67.42  | 0.00  | 0.00  |
| 433 | C:ILE | 433 | 97.56  | 0.00  | 0.00  |
| 434 | C:GLY | 434 | 11.30  | 4.46  | 0.05  |
| 435 | C:LYS | 435 | 79.81  | 0.00  | 0.00  |
| 436 | C:ALA | 436 | 55.76  | 0.00  | 0.00  |
| 437 | C:VAL | 437 | 75.09  | 13.39 | 0.21  |
| 438 | C:HIS | 438 | 54.99  | 53.49 | 0.91  |
| 439 | C:THR | 439 | 63.28  | 0.00  | 0.00  |
| 440 | C:VAL | 440 | 99.94  | 0.00  | 0.00  |
| 441 | C:LEU | 441 | 112.27 | 10.05 | 0.16  |
| 442 | C:GLY | 442 | 25.14  | 14.22 | 0.18  |
| 443 | C:GLY | 443 | 38.43  | 0.00  | 0.00  |
| 444 | C:ALA | 444 | 55.78  | 0.00  | 0.00  |
| 445 | C:PHE | 445 | 50.20  | 3.14  | 0.05  |
| 446 | C:ASN | 446 | 97.77  | 9.39  | -0.09 |
| 447 | C:SER | 447 | 97.70  | 0.00  | 0.00  |
| 448 | C:ILE | 448 | 125.16 | 0.00  | 0.00  |
| 449 | C:PHE | 449 | 31.61  | 0.00  | 0.00  |
| 450 | C:GLY | 450 | 44.24  | 0.00  | 0.00  |
| 451 | C:GLY | 451 | 91.86  | 0.00  | 0.00  |
| 452 | C:VAL | 452 | 60.33  | 0.00  | 0.00  |
| 453 | C:GLY | 453 | 37.75  | 0.00  | 0.00  |
| 454 | C:PHE | 454 | 151.43 | 0.00  | 0.00  |
| 455 | C:LEU | 455 | 106.10 | 0.00  | 0.00  |
| 456 | C:PRO | 456 | 58.09  | 0.00  | 0.00  |
| 457 | C:LYS | 457 | 35.80  | 0.00  | 0.00  |
| 458 | C:LEU | 458 | 83.72  | 0.00  | 0.00  |
| 459 | C:LEU | 459 | 111.54 | 0.00  | 0.00  |
| 460 | C:LEU | 460 | 85.99  | 0.00  | 0.00  |
| 461 | C:GLY | 461 | 0.24   | 0.00  | 0.00  |
| 462 | C:VAL | 462 | 74.47  | 0.00  | 0.00  |
| 463 | C:ALA | 463 | 46.95  | 0.00  | 0.00  |
| 464 | C:LEU | 464 | 51.21  | 0.00  | 0.00  |
| 465 | C:ALA | 465 | 25.77  | 0.00  | 0.00  |
| 466 | C:TRP | 466 | 163.18 | 0.00  | 0.00  |
| 467 | C:LEU | 467 | 81.75  | 0.00  | 0.00  |
| 468 | C:GLY | 468 | 1.79   | 0.00  | 0.00  |
| 469 | C:LEU | 469 | 129.47 | 0.00  | 0.00  |
| 470 | C:ASN | 470 | 93.08  | 0.00  | 0.00  |
| 471 | C:MET | 471 | 49.84  | 0.00  | 0.00  |
| 472 | C:ARG | 472 | 204.38 | 0.00  | 0.00  |
| 473 | C:ASN | 473 | 149.43 | 0.00  | 0.00  |
| 474 | C:PRO | 474 | 64.87  | 0.00  | 0.00  |
| 475 | C:THR | 475 | 119.08 | 0.00  | 0.00  |
| 476 | C:MET | 476 | 111.99 | 0.00  | 0.00  |
| 477 | C:SER | 477 | 25.89  | 0.00  | 0.00  |
| 478 | C:MET | 478 | 126.87 | 0.00  | 0.00  |
| 479 | C:SER | 479 | 63.70  | 0.00  | 0.00  |
| 480 | C:PHE | 480 | 60.04  | 0.00  | 0.00  |
| 481 | C:LEU | 481 | 68.06  | 0.00  | 0.00  |
| 482 | C:LEU | 482 | 92.54  | 0.00  | 0.00  |
| 483 | C:ALA | 483 | 46.83  | 0.00  | 0.00  |
| 484 | C:GLY | 484 | 0.16   | 0.00  | 0.00  |
| 485 | C:GLY | 485 | 34.52  | 0.00  | 0.00  |
| 486 | C:LEU | 486 | 107.71 | 0.00  | 0.00  |
| 487 | C:VAL | 487 | 9.62   | 0.00  | 0.00  |
| 488 | C:LEU | 488 | 53.04  | 0.00  | 0.00  |

|     |       |     |        |       |      |
|-----|-------|-----|--------|-------|------|
| 489 | C:ALA | 489 | 57.92  | 0.00  | 0.00 |
| 490 | C:MET | 490 | 97.66  | 43.08 | 0.69 |
| 491 | C:THR | 491 | 27.49  | 0.00  | 0.00 |
| 492 | C:LEU | 492 | 140.64 | 0.00  | 0.00 |
| 493 | C:GLY | 493 | 67.87  | 10.98 | 0.11 |
| 494 | C:VAL | 494 | 137.40 | 22.59 | 0.36 |



is a member of

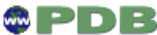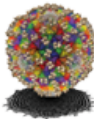

EMDataBank

Unified Data Resource for 3DEM

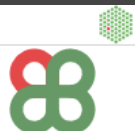

Protein Data Bank

in Europe

PDBePISA

[pdbe.org/pisa](http://pdbe.org/pisa)

[PDB](#)

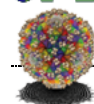

EMDataBank  
Unified Data Resource for 3DEM

[Services](#)

[Research](#)

[Training](#)

[About us](#)

Bringing Structure to  
Biology

[Feedback](#)

[Share](#)

## PISA Interface.

[Session Map](#) (id=179-P6-IE2)

|                       |                            |                                  |
|-----------------------|----------------------------|----------------------------------|
| <a href="#">Start</a> | <a href="#">Interfaces</a> | <a href="#">Interface Search</a> |
| -                     | <a href="#">Monomers</a>   | -                                |
| -                     | <a href="#">Assemblies</a> | -                                |

interface # 56 in ourmodelfortest2.pdb crystal.

Space symmetry group: P 1

interface #56/96

[XML](#) [<<](#) [<](#) [>](#) [>>](#)

### Interface Summary

[XML](#)

View [structure 1](#) [interface](#) [structure 2](#)

Download

[structure 1](#) [interface](#) [structure 2](#)

This interface scored

**0.000**

in Complex Formation Significance Score (CSS).

CSS ranges from 0 to 1 as interface relevance to complex formation increases.

Achieved CSS implies that the interface does not play any role in complex formation and seems to be a result of

|                                   | Structure 1 |        | Structure 2 |        |
|-----------------------------------|-------------|--------|-------------|--------|
| <b>Selection range</b>            | [CPL]A:500  |        | E           |        |
| <b>class</b>                      | Ligand      |        | Protein     |        |
| <b>symmetry operation</b>         | x,y,z       |        | x,y,z       |        |
| <b>symmetry ID</b>                | 1_555       |        | 0_555       |        |
| <b>Number of atoms</b>            |             |        |             |        |
| <b>interface</b>                  | 3           | 10.7%  | 9           | 1.6%   |
| <b>surface</b>                    | 27          | 96.4%  | 458         | 79.0%  |
| <b>total</b>                      | 28          | 100.0% | 580         | 100.0% |
| <b>Number of residues</b>         |             |        |             |        |
| <b>interface</b>                  | 1           | 100.0% | 4           | 5.4%   |
| <b>surface</b>                    | 1           | 100.0% | 74          | 100.0% |
| <b>total</b>                      | 1           | 100.0% | 74          | 100.0% |
| <b>Solvent-accessible area, Å</b> |             |        |             |        |
| <b>interface</b>                  | 65.2        | 9.6%   | 56.4        | 0.8%   |
| <b>total</b>                      | 676.9       | 100.0% | 7155.8      | 100.0% |
| <b>Solvation energy, kcal/mol</b> |             |        |             |        |
| <b>isolated structure</b>         | 3.0         | 100.0% | -48.5       | 100.0% |
| <b>gain on complex formation</b>  | 2.2         | 71.1%  | 0.1         | -0.1%  |
| <b>average gain</b>               | -0.3        | -11.1% | -1.0        | 2.0%   |
| <b>P-value</b>                    | 0.937       |        | 0.839       |        |

No disulfide bonds found

No covalent bonds found

No hydrogen bonds found

No salt bridges found

### Interfacing residues (not a contact table)

[XML](#)

Display level: [Residues](#)

Inaccessible residues

HSDC

Residues making Hydrogen/Disulphide bond, Salt bridge or Covalent link

Solvent-accessible residues

Interfacing residues

**ASA** Accessible Surface Area, Å<sup>2</sup> **BSA** Buried Surface Area, Å<sup>2</sup> **Δ<sup>‡</sup>G** Solvation energy effect, kcal/mol |||| Buried area percentage, one bar per 10%

| ## | Structure 1 | HSDC | ASA    | BSA   | $\Delta^iG$ | ## | Structure 2 | HSDC | ASA    | BSA   | $\Delta^iG$ |
|----|-------------|------|--------|-------|-------------|----|-------------|------|--------|-------|-------------|
| 1  | A:CPL 500   |      | 676.90 | 65.22 | -2.15       | 1  | E:SER 1     |      | 162.28 | 0.00  | 0.00        |
|    |             |      |        |       |             | 2  | E:VAL 2     |      | 137.23 | 0.00  | 0.00        |
|    |             |      |        |       |             | 3  | E:LEU 3     |      | 161.24 | 0.00  | 0.00        |
|    |             |      |        |       |             | 4  | E:ILE 4     |      | 147.13 | 0.00  | 0.00        |
|    |             |      |        |       |             | 5  | E:PRO 5     |      | 112.52 | 0.00  | 0.00        |
|    |             |      |        |       |             | 6  | E:SER 6     |      | 110.25 | 0.00  | 0.00        |
|    |             |      |        |       |             | 7  | E:HIS 7     |      | 135.91 | 0.00  | 0.00        |
|    |             |      |        |       |             | 8  | E:ALA 8     |      | 56.90  | 0.00  | 0.00        |
|    |             |      |        |       |             | 9  | E:GLN 9     |      | 111.22 | 0.00  | 0.00        |
|    |             |      |        |       |             | 10 | E:GLY 10    |      | 66.09  | 13.25 | -0.15       |
|    |             |      |        |       |             | 11 | E:GLU 11    |      | 144.11 | 12.74 | -0.06       |
|    |             |      |        |       |             | 12 | E:LEU 12    |      | 131.89 | 0.17  | 0.00        |
|    |             |      |        |       |             | 13 | E:THR 13    |      | 123.08 | 30.28 | 0.14        |
|    |             |      |        |       |             | 14 | E:GLY 14    |      | 54.55  | 0.00  | 0.00        |
|    |             |      |        |       |             | 15 | E:ARG 15    |      | 245.38 | 0.00  | 0.00        |
|    |             |      |        |       |             | 16 | E:GLY 16    |      | 60.33  | 0.00  | 0.00        |
|    |             |      |        |       |             | 17 | E:HIS 17    |      | 196.30 | 0.00  | 0.00        |
|    |             |      |        |       |             | 18 | E:LYS 18    |      | 154.71 | 0.00  | 0.00        |
|    |             |      |        |       |             | 19 | E:TRP 19    |      | 218.21 | 0.00  | 0.00        |
|    |             |      |        |       |             | 20 | E:LEU 20    |      | 127.06 | 0.00  | 0.00        |
|    |             |      |        |       |             | 21 | E:GLU 21    |      | 159.70 | 0.00  | 0.00        |
|    |             |      |        |       |             | 22 | E:GLY 22    |      | 35.97  | 0.00  | 0.00        |
|    |             |      |        |       |             | 23 | E:ASP 23    |      | 111.68 | 0.00  | 0.00        |
|    |             |      |        |       |             | 24 | E:SER 24    |      | 28.80  | 0.00  | 0.00        |
|    |             |      |        |       |             | 25 | E:LEU 25    |      | 125.66 | 0.00  | 0.00        |
|    |             |      |        |       |             | 26 | E:ARG 26    |      | 170.66 | 0.00  | 0.00        |
|    |             |      |        |       |             | 27 | E:THR 27    |      | 71.61  | 0.00  | 0.00        |
|    |             |      |        |       |             | 28 | E:HIS 28    |      | 58.67  | 0.00  | 0.00        |
|    |             |      |        |       |             | 29 | E:LEU 29    |      | 99.01  | 0.00  | 0.00        |
|    |             |      |        |       |             | 30 | E:THR 30    |      | 91.14  | 0.00  | 0.00        |
|    |             |      |        |       |             | 31 | E:ARG 31    |      | 141.69 | 0.00  | 0.00        |
|    |             |      |        |       |             | 32 | E:VAL 32    |      | 15.71  | 0.00  | 0.00        |
|    |             |      |        |       |             | 33 | E:GLU 33    |      | 100.81 | 0.00  | 0.00        |
|    |             |      |        |       |             | 34 | E:GLY 34    |      | 44.02  | 0.00  | 0.00        |
|    |             |      |        |       |             | 35 | E:TRP 35    |      | 57.77  | 0.00  | 0.00        |
|    |             |      |        |       |             | 36 | E:VAL 36    |      | 40.10  | 0.00  | 0.00        |
|    |             |      |        |       |             | 37 | E:TRP 37    |      | 191.72 | 0.00  | 0.00        |
|    |             |      |        |       |             | 38 | E:LYS 38    |      | 167.61 | 0.00  | 0.00        |
|    |             |      |        |       |             | 39 | E:ASN 39    |      | 50.19  | 0.00  | 0.00        |
|    |             |      |        |       |             | 40 | E:LYS 40    |      | 102.83 | 0.00  | 0.00        |
|    |             |      |        |       |             | 41 | E:LEU 41    |      | 141.60 | 0.00  | 0.00        |
|    |             |      |        |       |             | 42 | E:LEU 42    |      | 95.36  | 0.00  | 0.00        |
|    |             |      |        |       |             | 43 | E:ALA 43    |      | 11.07  | 0.00  | 0.00        |
|    |             |      |        |       |             | 44 | E:LEU 44    |      | 112.31 | 0.00  | 0.00        |
|    |             |      |        |       |             | 45 | E:ALA 45    |      | 44.53  | 0.00  | 0.00        |
|    |             |      |        |       |             | 46 | E:MET 46    |      | 31.31  | 0.00  | 0.00        |
|    |             |      |        |       |             | 47 | E:VAL 47    |      | 52.53  | 0.00  | 0.00        |
|    |             |      |        |       |             | 48 | E:THR 48    |      | 74.21  | 0.00  | 0.00        |
|    |             |      |        |       |             | 49 | E:VAL 49    |      | 86.49  | 0.00  | 0.00        |
|    |             |      |        |       |             | 50 | E:VAL 50    |      | 11.06  | 0.00  | 0.00        |
|    |             |      |        |       |             | 51 | E:TRP 51    |      | 162.60 | 0.00  | 0.00        |
|    |             |      |        |       |             | 52 | E:LEU 52    |      | 136.64 | 0.00  | 0.00        |
|    |             |      |        |       |             | 53 | E:THR 53    |      | 85.79  | 0.00  | 0.00        |
|    |             |      |        |       |             | 54 | E:LEU 54    |      | 80.44  | 0.00  | 0.00        |
|    |             |      |        |       |             | 55 | E:GLU 55    |      | 165.15 | 0.00  | 0.00        |
|    |             |      |        |       |             | 56 | E:SER 56    |      | 45.11  | 0.00  | 0.00        |
|    |             |      |        |       |             | 57 | E:VAL 57    |      | 100.08 | 0.00  | 0.00        |
|    |             |      |        |       |             | 58 | E:VAL 58    |      | 112.68 | 0.00  | 0.00        |
|    |             |      |        |       |             | 59 | E:THR 59    |      | 58.47  | 0.00  | 0.00        |
|    |             |      |        |       |             | 60 | E:ARG 60    |      | 33.88  | 0.00  | 0.00        |
|    |             |      |        |       |             | 61 | E:VAL 61    |      | 78.68  | 0.00  | 0.00        |
|    |             |      |        |       |             | 62 | E:ALA 62    |      | 53.34  | 0.00  | 0.00        |
|    |             |      |        |       |             | 63 | E:VAL 63    |      | 58.74  | 0.00  | 0.00        |
|    |             |      |        |       |             | 64 | E:LEU 64    |      | 34.04  | 0.00  | 0.00        |
|    |             |      |        |       |             | 65 | E:VAL 65    |      | 78.01  | 0.00  | 0.00        |
|    |             |      |        |       |             | 66 | E:VAL 66    |      | 77.68  | 0.00  | 0.00        |
|    |             |      |        |       |             | 67 | E:LEU 67    |      | 65.20  | 0.00  | 0.00        |
|    |             |      |        |       |             | 68 | E:LEU 68    |      | 60.55  | 0.00  | 0.00        |
|    |             |      |        |       |             | 69 | E:CYS 69    |      | 47.98  | 0.00  | 0.00        |
|    |             |      |        |       |             | 70 | E:LEU 70    |      | 100.40 | 0.00  | 0.00        |
|    |             |      |        |       |             | 71 | E:ALA 71    |      | 28.11  | 0.00  | 0.00        |
|    |             |      |        |       |             | 72 | E:PRO 72    |      | 15.62  | 0.00  | 0.00        |
|    |             |      |        |       |             | 73 | E:VAL 73    |      | 75.89  | 0.00  | 0.00        |
|    |             |      |        |       |             | 74 | E:TYR 74    |      | 218.50 | 0.00  | 0.00        |





Protein Data Bank

in Europe

PDBePISA

[pdbe.org/pisa](http://pdbe.org/pisa)

[PDB](#)



EMDataBank  
Unified Data Resource for 3DEM

[Services](#) [Research](#) [Training](#) [About us](#)

Bringing Structure to  
Biology

[Feedback](#) [Share](#)

## PISA Interface.

**Session Map** (id=179-P6-IE2)

|                       |                            |                                  |
|-----------------------|----------------------------|----------------------------------|
| <a href="#">Start</a> | <a href="#">Interfaces</a> | <a href="#">Interface Search</a> |
| -                     | <a href="#">Monomers</a>   | -                                |
| -                     | <a href="#">Assemblies</a> | -                                |

**interface # 57 in ourmodelfortest2.pdb crystal.**

Space symmetry group: P 1

**interface #57/96**

[XML](#) [<<](#) [<](#) [>](#) [>>](#)

### Interface Summary

[XML](#)

View [structure 1](#) [interface](#) [structure 2](#)

Download

[structure 1](#) [interface](#) [structure 2](#)

This interface scored

**0.000**

in Complex Formation Significance Score (CSS).

CSS ranges from 0 to 1 as interface relevance to complex formation increases.

Achieved CSS implies that the interface does not play any role in complex formation and seems to be a result of

|                                   | Structure 1 |        | Structure 2 |        |
|-----------------------------------|-------------|--------|-------------|--------|
| <b>Selection range</b>            | [CPL]B:500  |        | F           |        |
| <b>class</b>                      | Ligand      |        | Protein     |        |
| <b>symmetry operation</b>         | x,y,z       |        | x,y,z       |        |
| <b>symmetry ID</b>                | 1_555       |        | 0_555       |        |
| <b>Number of atoms</b>            |             |        |             |        |
| <b>interface</b>                  | 3           | 10.7%  | 7           | 1.2%   |
| <b>surface</b>                    | 27          | 96.4%  | 440         | 77.5%  |
| <b>total</b>                      | 28          | 100.0% | 568         | 100.0% |
| <b>Number of residues</b>         |             |        |             |        |
| <b>interface</b>                  | 1           | 100.0% | 4           | 5.5%   |
| <b>surface</b>                    | 1           | 100.0% | 73          | 100.0% |
| <b>total</b>                      | 1           | 100.0% | 73          | 100.0% |
| <b>Solvent-accessible area, Å</b> |             |        |             |        |
| <b>interface</b>                  | 61.0        | 9.2%   | 56.6        | 0.8%   |
| <b>total</b>                      | 660.8       | 100.0% | 6964.6      | 100.0% |
| <b>Solvation energy, kcal/mol</b> |             |        |             |        |
| <b>isolated structure</b>         | 2.3         | 100.0% | -42.8       | 100.0% |
| <b>gain on complex formation</b>  | 2.0         | 86.3%  | -0.2        | 0.4%   |
| <b>average gain</b>               | -0.3        | -11.1% | -0.8        | 2.0%   |
| <b>P-value</b>                    | 0.936       |        | 0.773       |        |

No disulfide bonds found

No covalent bonds found

No hydrogen bonds found

No salt bridges found

### Interfacing residues (not a contact table)

[XML](#)

Display level: [Residues](#)

Inaccessible residues

HSDC

Residues making Hydrogen/Disulphide bond, Salt bridge or Covalent link

Solvent-accessible residues

Interfacing residues

**ASA** Accessible Surface Area, Å<sup>2</sup> **BSA** Buried Surface Area, Å<sup>2</sup> **Δ<sup>1</sup>G** Solvation energy effect, kcal/mol |||| Buried area percentage, one bar per 10%

| ## | Structure 1 | HSDC | ASA    | BSA   | $\Delta^iG$ | ## | Structure 2 | HSDC | ASA    | BSA   | $\Delta^iG$ |
|----|-------------|------|--------|-------|-------------|----|-------------|------|--------|-------|-------------|
| 1  | B:CPL 500   |      | 660.81 | 60.99 | -2.01       | 1  | F:SER 1     |      | 171.32 | 0.00  | 0.00        |
|    |             |      |        |       |             | 2  | F:VAL 2     |      | 141.48 | 0.00  | 0.00        |
|    |             |      |        |       |             | 3  | F:LEU 3     |      | 150.11 | 0.00  | 0.00        |
|    |             |      |        |       |             | 4  | F:ILE 4     |      | 158.00 | 0.00  | 0.00        |
|    |             |      |        |       |             | 5  | F:PRO 5     |      | 100.01 | 0.00  | 0.00        |
|    |             |      |        |       |             | 6  | F:SER 6     |      | 109.34 | 0.00  | 0.00        |
|    |             |      |        |       |             | 7  | F:HIS 7     |      | 142.17 | 0.00  | 0.00        |
|    |             |      |        |       |             | 8  | F:ALA 8     |      | 58.49  | 0.00  | 0.00        |
|    |             |      |        |       |             | 9  | F:GLN 9     |      | 104.15 | 0.00  | 0.00        |
|    |             |      |        |       |             | 10 | F:GLY 10    |      | 68.14  | 17.90 | -0.20       |
|    |             |      |        |       |             | 11 | F:GLU 11    |      | 142.29 | 10.38 | -0.08       |
|    |             |      |        |       |             | 12 | F:LEU 12    |      | 144.81 | 0.50  | 0.01        |
|    |             |      |        |       |             | 13 | F:THR 13    |      | 119.10 | 27.83 | 0.44        |
|    |             |      |        |       |             | 14 | F:GLY 14    |      | 51.05  | 0.00  | 0.00        |
|    |             |      |        |       |             | 15 | F:ARG 15    |      | 244.79 | 0.00  | 0.00        |
|    |             |      |        |       |             | 16 | F:GLY 16    |      | 63.06  | 0.00  | 0.00        |
|    |             |      |        |       |             | 17 | F:HIS 17    |      | 195.74 | 0.00  | 0.00        |
|    |             |      |        |       |             | 18 | F:LYS 18    |      | 139.73 | 0.00  | 0.00        |
|    |             |      |        |       |             | 19 | F:TRP 19    |      | 221.87 | 0.00  | 0.00        |
|    |             |      |        |       |             | 20 | F:LEU 20    |      | 129.13 | 0.00  | 0.00        |
|    |             |      |        |       |             | 21 | F:GLU 21    |      | 121.55 | 0.00  | 0.00        |
|    |             |      |        |       |             | 22 | F:GLY 22    |      | 24.62  | 0.00  | 0.00        |
|    |             |      |        |       |             | 23 | F:ASP 23    |      | 100.64 | 0.00  | 0.00        |
|    |             |      |        |       |             | 24 | F:SER 24    |      | 35.09  | 0.00  | 0.00        |
|    |             |      |        |       |             | 25 | F:LEU 25    |      | 137.96 | 0.00  | 0.00        |
|    |             |      |        |       |             | 26 | F:ARG 26    |      | 161.11 | 0.00  | 0.00        |
|    |             |      |        |       |             | 27 | F:THR 27    |      | 30.15  | 0.00  | 0.00        |
|    |             |      |        |       |             | 28 | F:HIS 28    |      | 74.34  | 0.00  | 0.00        |
|    |             |      |        |       |             | 29 | F:LEU 29    |      | 113.18 | 0.00  | 0.00        |
|    |             |      |        |       |             | 30 | F:THR 30    |      | 90.96  | 0.00  | 0.00        |
|    |             |      |        |       |             | 31 | F:ARG 31    |      | 140.07 | 0.00  | 0.00        |
|    |             |      |        |       |             | 32 | F:VAL 32    |      | 26.26  | 0.00  | 0.00        |
|    |             |      |        |       |             | 33 | F:GLU 33    |      | 90.06  | 0.00  | 0.00        |
|    |             |      |        |       |             | 34 | F:GLY 34    |      | 36.46  | 0.00  | 0.00        |
|    |             |      |        |       |             | 35 | F:TRP 35    |      | 64.77  | 0.00  | 0.00        |
|    |             |      |        |       |             | 36 | F:VAL 36    |      | 37.48  | 0.00  | 0.00        |
|    |             |      |        |       |             | 37 | F:TRP 37    |      | 174.62 | 0.00  | 0.00        |
|    |             |      |        |       |             | 38 | F:LYS 38    |      | 141.86 | 0.00  | 0.00        |
|    |             |      |        |       |             | 39 | F:ASN 39    |      | 28.89  | 0.00  | 0.00        |
|    |             |      |        |       |             | 40 | F:LYS 40    |      | 116.81 | 0.00  | 0.00        |
|    |             |      |        |       |             | 41 | F:LEU 41    |      | 150.44 | 0.00  | 0.00        |
|    |             |      |        |       |             | 42 | F:LEU 42    |      | 87.34  | 0.00  | 0.00        |
|    |             |      |        |       |             | 43 | F:ALA 43    |      | 4.32   | 0.00  | 0.00        |
|    |             |      |        |       |             | 44 | F:LEU 44    |      | 106.33 | 0.00  | 0.00        |
|    |             |      |        |       |             | 45 | F:ALA 45    |      | 32.82  | 0.00  | 0.00        |
|    |             |      |        |       |             | 46 | F:MET 46    |      | 94.80  | 0.00  | 0.00        |
|    |             |      |        |       |             | 47 | F:VAL 47    |      | 47.85  | 0.00  | 0.00        |
|    |             |      |        |       |             | 48 | F:THR 48    |      | 78.21  | 0.00  | 0.00        |
|    |             |      |        |       |             | 49 | F:VAL 49    |      | 79.37  | 0.00  | 0.00        |
|    |             |      |        |       |             | 50 | F:VAL 50    |      | 21.09  | 0.00  | 0.00        |
|    |             |      |        |       |             | 51 | F:TRP 51    |      | 135.03 | 0.00  | 0.00        |
|    |             |      |        |       |             | 52 | F:LEU 52    |      | 155.33 | 0.00  | 0.00        |
|    |             |      |        |       |             | 53 | F:THR 53    |      | 101.07 | 0.00  | 0.00        |
|    |             |      |        |       |             | 54 | F:LEU 54    |      | 44.71  | 0.00  | 0.00        |
|    |             |      |        |       |             | 55 | F:GLU 55    |      | 144.82 | 0.00  | 0.00        |
|    |             |      |        |       |             | 56 | F:SER 56    |      | 51.76  | 0.00  | 0.00        |
|    |             |      |        |       |             | 57 | F:VAL 57    |      | 86.74  | 0.00  | 0.00        |
|    |             |      |        |       |             | 58 | F:VAL 58    |      | 109.01 | 0.00  | 0.00        |
|    |             |      |        |       |             | 59 | F:THR 59    |      | 55.44  | 0.00  | 0.00        |
|    |             |      |        |       |             | 60 | F:ARG 60    |      | 33.48  | 0.00  | 0.00        |
|    |             |      |        |       |             | 61 | F:VAL 61    |      | 75.74  | 0.00  | 0.00        |
|    |             |      |        |       |             | 62 | F:ALA 62    |      | 52.99  | 0.00  | 0.00        |
|    |             |      |        |       |             | 63 | F:VAL 63    |      | 55.55  | 0.00  | 0.00        |
|    |             |      |        |       |             | 64 | F:LEU 64    |      | 25.28  | 0.00  | 0.00        |
|    |             |      |        |       |             | 65 | F:VAL 65    |      | 77.55  | 0.00  | 0.00        |
|    |             |      |        |       |             | 66 | F:VAL 66    |      | 80.18  | 0.00  | 0.00        |
|    |             |      |        |       |             | 67 | F:LEU 67    |      | 81.69  | 0.00  | 0.00        |
|    |             |      |        |       |             | 68 | F:LEU 68    |      | 63.56  | 0.00  | 0.00        |
|    |             |      |        |       |             | 69 | F:CYS 69    |      | 58.15  | 0.00  | 0.00        |
|    |             |      |        |       |             | 70 | F:LEU 70    |      | 119.83 | 0.00  | 0.00        |
|    |             |      |        |       |             | 71 | F:ALA 71    |      | 27.06  | 0.00  | 0.00        |
|    |             |      |        |       |             | 72 | F:PRO 72    |      | 45.84  | 0.00  | 0.00        |
|    |             |      |        |       |             | 73 | F:VAL 73    |      | 179.54 | 0.00  | 0.00        |

is a member of

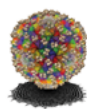



Protein Data Bank

in Europe

PDBePISA

[pdbe.org/pisa](http://pdbe.org/pisa)

[PDB](#)

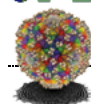

EMDataBank  
Unified Data Resource for 3DEM

[Services](#)

[Research](#)

[Training](#)

[About us](#)

Bringing Structure to  
Biology

[Feedback](#)

[Share](#)

## PISA Interface.

Session Map (id=179-P6-IE2)

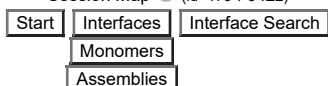

**interface # 53 in ourmodelfortest2.pdb crystal.**

Space symmetry group: P 1

**interface #53/96**

[XML](#) [<<](#) [<](#) [>](#) [>>](#)

### Interface Summary

[XML](#)

View [structure 1](#) [interface](#) [structure 2](#)

Download

[structure 1](#) [interface](#) [structure 2](#)

This interface scored

**0.000**

in Complex Formation Significance Score (CSS).

CSS ranges from 0 to 1 as interface relevance to complex formation increases.

Achieved CSS implies that the interface does not play any role in complex formation and seems to be a result of

|                                   | Structure 1 |        | Structure 2 |        |
|-----------------------------------|-------------|--------|-------------|--------|
| <b>Selection range</b>            | [CPL]C:500  |        | J           |        |
| <b>class</b>                      | Ligand      |        | Protein     |        |
| <b>symmetry operation</b>         | x,y,z       |        | x,y,z       |        |
| <b>symmetry ID</b>                | 1_555       |        | 0_555       |        |
| <b>Number of atoms</b>            |             |        |             |        |
| <b>interface</b>                  | 3           | 10.7%  | 8           | 1.4%   |
| <b>surface</b>                    | 27          | 96.4%  | 449         | 77.4%  |
| <b>total</b>                      | 28          | 100.0% | 580         | 100.0% |
| <b>Number of residues</b>         |             |        |             |        |
| <b>interface</b>                  | 1           | 100.0% | 4           | 5.4%   |
| <b>surface</b>                    | 1           | 100.0% | 74          | 100.0% |
| <b>total</b>                      | 1           | 100.0% | 74          | 100.0% |
| <b>Solvent-accessible area, Å</b> |             |        |             |        |
| <b>interface</b>                  | 66.4        | 10.0%  | 59.7        | 0.8%   |
| <b>total</b>                      | 661.8       | 100.0% | 7152.1      | 100.0% |
| <b>Solvation energy, kcal/mol</b> |             |        |             |        |
| <b>isolated structure</b>         | 1.6         | 100.0% | -45.8       | 100.0% |
| <b>gain on complex formation</b>  | 2.2         | 138.4% | 0.1         | -0.3%  |
| <b>average gain</b>               | -0.2        | -11.1% | -0.9        | 2.0%   |
| <b>P-value</b>                    | 0.943       |        | 0.855       |        |

No disulfide bonds found

No covalent bonds found

No hydrogen bonds found

No salt bridges found

### Interfacing residues (not a contact table)

[XML](#)

Display level: [Residues](#)

Inaccessible residues

HSDC

Residues making Hydrogen/Disulphide bond, Salt bridge or Covalent link

Solvent-accessible residues

Interfacing residues

**ASA** Accessible Surface Area, Å<sup>2</sup> **BSA** Buried Surface Area, Å<sup>2</sup> **Δ<sup>1</sup>G** Solvation energy effect, kcal/mol |||| Buried area percentage, one bar per 10%

| ## | Structure 1 | HSDC | ASA    | BSA   | $\Delta^iG$ | ## | Structure 2 | HSDC | ASA    | BSA   | $\Delta^iG$ |
|----|-------------|------|--------|-------|-------------|----|-------------|------|--------|-------|-------------|
| 1  | C:CPL 500   |      | 661.85 | 66.41 | -2.19       | 1  | J:SER 1     |      | 162.75 | 0.00  | 0.00        |
|    |             |      |        |       |             | 2  | J:VAL 2     |      | 136.01 | 0.00  | 0.00        |
|    |             |      |        |       |             | 3  | J:LEU 3     |      | 156.32 | 0.00  | 0.00        |
|    |             |      |        |       |             | 4  | J:ILE 4     |      | 146.95 | 0.00  | 0.00        |
|    |             |      |        |       |             | 5  | J:PRO 5     |      | 112.87 | 0.00  | 0.00        |
|    |             |      |        |       |             | 6  | J:SER 6     |      | 111.93 | 0.00  | 0.00        |
|    |             |      |        |       |             | 7  | J:HIS 7     |      | 140.01 | 0.00  | 0.00        |
|    |             |      |        |       |             | 8  | J:ALA 8     |      | 56.50  | 0.00  | 0.00        |
|    |             |      |        |       |             | 9  | J:GLN 9     |      | 101.99 | 0.00  | 0.00        |
|    |             |      |        |       |             | 10 | J:GLY 10    |      | 72.91  | 13.87 | -0.16       |
|    |             |      |        |       |             | 11 | J:GLU 11    |      | 137.09 | 11.39 | 0.00        |
|    |             |      |        |       |             | 12 | J:LEU 12    |      | 132.55 | 1.17  | 0.02        |
|    |             |      |        |       |             | 13 | J:THR 13    |      | 130.61 | 33.23 | -0.01       |
|    |             |      |        |       |             | 14 | J:GLY 14    |      | 53.78  | 0.00  | 0.00        |
|    |             |      |        |       |             | 15 | J:ARG 15    |      | 245.58 | 0.00  | 0.00        |
|    |             |      |        |       |             | 16 | J:GLY 16    |      | 59.77  | 0.00  | 0.00        |
|    |             |      |        |       |             | 17 | J:HIS 17    |      | 196.27 | 0.00  | 0.00        |
|    |             |      |        |       |             | 18 | J:LYS 18    |      | 136.18 | 0.00  | 0.00        |
|    |             |      |        |       |             | 19 | J:TRP 19    |      | 234.99 | 0.00  | 0.00        |
|    |             |      |        |       |             | 20 | J:LEU 20    |      | 138.57 | 0.00  | 0.00        |
|    |             |      |        |       |             | 21 | J:GLU 21    |      | 165.37 | 0.00  | 0.00        |
|    |             |      |        |       |             | 22 | J:GLY 22    |      | 38.46  | 0.00  | 0.00        |
|    |             |      |        |       |             | 23 | J:ASP 23    |      | 116.00 | 0.00  | 0.00        |
|    |             |      |        |       |             | 24 | J:SER 24    |      | 55.09  | 0.00  | 0.00        |
|    |             |      |        |       |             | 25 | J:LEU 25    |      | 138.00 | 0.00  | 0.00        |
|    |             |      |        |       |             | 26 | J:ARG 26    |      | 185.03 | 0.00  | 0.00        |
|    |             |      |        |       |             | 27 | J:THR 27    |      | 56.10  | 0.00  | 0.00        |
|    |             |      |        |       |             | 28 | J:HIS 28    |      | 62.48  | 0.00  | 0.00        |
|    |             |      |        |       |             | 29 | J:LEU 29    |      | 89.84  | 0.00  | 0.00        |
|    |             |      |        |       |             | 30 | J:THR 30    |      | 87.63  | 0.00  | 0.00        |
|    |             |      |        |       |             | 31 | J:ARG 31    |      | 126.79 | 0.00  | 0.00        |
|    |             |      |        |       |             | 32 | J:VAL 32    |      | 7.19   | 0.00  | 0.00        |
|    |             |      |        |       |             | 33 | J:GLU 33    |      | 96.02  | 0.00  | 0.00        |
|    |             |      |        |       |             | 34 | J:GLY 34    |      | 38.16  | 0.00  | 0.00        |
|    |             |      |        |       |             | 35 | J:TRP 35    |      | 61.93  | 0.00  | 0.00        |
|    |             |      |        |       |             | 36 | J:VAL 36    |      | 33.41  | 0.00  | 0.00        |
|    |             |      |        |       |             | 37 | J:TRP 37    |      | 189.93 | 0.00  | 0.00        |
|    |             |      |        |       |             | 38 | J:LYS 38    |      | 151.65 | 0.00  | 0.00        |
|    |             |      |        |       |             | 39 | J:ASN 39    |      | 45.58  | 0.00  | 0.00        |
|    |             |      |        |       |             | 40 | J:LYS 40    |      | 126.10 | 0.00  | 0.00        |
|    |             |      |        |       |             | 41 | J:LEU 41    |      | 148.20 | 0.00  | 0.00        |
|    |             |      |        |       |             | 42 | J:LEU 42    |      | 82.25  | 0.00  | 0.00        |
|    |             |      |        |       |             | 43 | J:ALA 43    |      | 9.33   | 0.00  | 0.00        |
|    |             |      |        |       |             | 44 | J:LEU 44    |      | 113.85 | 0.00  | 0.00        |
|    |             |      |        |       |             | 45 | J:ALA 45    |      | 32.51  | 0.00  | 0.00        |
|    |             |      |        |       |             | 46 | J:MET 46    |      | 85.27  | 0.00  | 0.00        |
|    |             |      |        |       |             | 47 | J:VAL 47    |      | 54.89  | 0.00  | 0.00        |
|    |             |      |        |       |             | 48 | J:THR 48    |      | 73.48  | 0.00  | 0.00        |
|    |             |      |        |       |             | 49 | J:VAL 49    |      | 87.01  | 0.00  | 0.00        |
|    |             |      |        |       |             | 50 | J:VAL 50    |      | 13.06  | 0.00  | 0.00        |
|    |             |      |        |       |             | 51 | J:TRP 51    |      | 141.12 | 0.00  | 0.00        |
|    |             |      |        |       |             | 52 | J:LEU 52    |      | 149.66 | 0.00  | 0.00        |
|    |             |      |        |       |             | 53 | J:THR 53    |      | 85.62  | 0.00  | 0.00        |
|    |             |      |        |       |             | 54 | J:LEU 54    |      | 74.09  | 0.00  | 0.00        |
|    |             |      |        |       |             | 55 | J:GLU 55    |      | 162.28 | 0.00  | 0.00        |
|    |             |      |        |       |             | 56 | J:SER 56    |      | 42.81  | 0.00  | 0.00        |
|    |             |      |        |       |             | 57 | J:VAL 57    |      | 92.00  | 0.00  | 0.00        |
|    |             |      |        |       |             | 58 | J:VAL 58    |      | 110.62 | 0.00  | 0.00        |
|    |             |      |        |       |             | 59 | J:THR 59    |      | 51.38  | 0.00  | 0.00        |
|    |             |      |        |       |             | 60 | J:ARG 60    |      | 25.25  | 0.00  | 0.00        |
|    |             |      |        |       |             | 61 | J:VAL 61    |      | 78.68  | 0.00  | 0.00        |
|    |             |      |        |       |             | 62 | J:ALA 62    |      | 55.30  | 0.00  | 0.00        |
|    |             |      |        |       |             | 63 | J:VAL 63    |      | 52.85  | 0.00  | 0.00        |
|    |             |      |        |       |             | 64 | J:LEU 64    |      | 28.26  | 0.00  | 0.00        |
|    |             |      |        |       |             | 65 | J:VAL 65    |      | 76.16  | 0.00  | 0.00        |
|    |             |      |        |       |             | 66 | J:VAL 66    |      | 85.68  | 0.00  | 0.00        |
|    |             |      |        |       |             | 67 | J:LEU 67    |      | 83.86  | 0.00  | 0.00        |
|    |             |      |        |       |             | 68 | J:LEU 68    |      | 66.46  | 0.00  | 0.00        |
|    |             |      |        |       |             | 69 | J:CYS 69    |      | 49.65  | 0.00  | 0.00        |
|    |             |      |        |       |             | 70 | J:LEU 70    |      | 81.67  | 0.00  | 0.00        |
|    |             |      |        |       |             | 71 | J:ALA 71    |      | 14.22  | 0.00  | 0.00        |
|    |             |      |        |       |             | 72 | J:PRO 72    |      | 25.51  | 0.00  | 0.00        |
|    |             |      |        |       |             | 73 | J:VAL 73    |      | 86.17  | 0.00  | 0.00        |
|    |             |      |        |       |             | 74 | J:TYR 74    |      | 198.56 | 0.00  | 0.00        |

is a member of

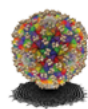

Supplement: s1 [file s1]
