# Supplementary material for: Molecular Organisation of Tick-Borne Encephalitis Virus
Source: MDPI journal article supplement (doi:10.3390/v14040792), 2022-04-11
Supplement: s1 [file s1]

**Table S2.** Comparative structural analysis of the distances between the M protein membrane-proximal helices (H1) of the two M proteins at the heterotetramer interface.

| <b>Virus</b>                                                              | <b>PDB</b> | <b>H1-H1 distance at the heterotetramer interface (Å)</b> | <b>Reference</b> |
|---------------------------------------------------------------------------|------------|-----------------------------------------------------------|------------------|
| <b>Tick-borne encephalitis (Kuutsalo-14)</b>                              | 7Z51       | 19.1                                                      | -                |
| <b>Chimeric flavivirus between Binjari and Murray Valley Encephalitis</b> | 7KVB       | 29.2                                                      | [17]             |
| <b>Chimeric flavivirus between Binjari and West Nile (Kunjin)</b>         | 7KV9       | 30.9                                                      | [17]             |
| <b>Chimeric flavivirus between Binjari and Dengue serotype-2</b>          | 7KV8       | 32.9                                                      | [17]             |
| <b>Dengue virus serotype-2</b>                                            | 6ZQU       | 32.7                                                      | [19]             |
| <b>Dengue virus serotype-2</b>                                            | 7V3F       | 28.9                                                      | [64]             |
| <b>Dengue virus serotype-2</b>                                            | 3J27       | 31.6                                                      | [65]             |
| <b>Spondweni</b>                                                          | 6ZQV       | 32.1                                                      | [19]             |
| <b>Tick-borne encephalitis (Hypr)</b>                                     | 5O6A       | 25.7                                                      | [4]              |
| <b>Usutu</b>                                                              | 7LCH       | 36.7                                                      | [18]             |
| <b>Usutu</b>                                                              | 7LCG       | 36.6                                                      | [18]             |
| <b>West Nile virus (Kunjin)</b>                                           | 7KVA       | 38.6                                                      | [17]             |
| <b>Zika</b>                                                               | 6C08       | 35.2                                                      | [46]             |
| <b>Zika</b>                                                               | 5IZ7       | 28.6                                                      | [66]             |
| <b>Zika</b>                                                               | 5IRE       | 35.3                                                      | [67]             |
