# Supplementary material for: Molecular Organisation of Tick-Borne Encephalitis Virus
Source: MDPI journal article supplement (doi:10.3390/v14040792), 2022-04-11
Supplement: s1 [file s1]

**Table S1.** Cryo-EM data collection, reconstruction, and modelling statistics

| <b>Data collection and processing</b>                |                           |                           |
|------------------------------------------------------|---------------------------|---------------------------|
|                                                      | <b>Preparation 1</b>      | <b>Final</b>              |
| Microscope                                           | Thermo Fisher Titan Krios | Thermo Fisher Titan Krios |
| Detector                                             | Gatan K2                  | Gatan K3                  |
| Magnification                                        | 165 000                   | 81 000                    |
| Voltage (kV)                                         | 300                       | 300                       |
| Electron exposure (e <sup>-</sup> / Å <sup>2</sup> ) | 28.3                      | 40                        |
| Defocus (μm)                                         | -0.9 – -3.0               | -0.7 – -2.7               |
| Defocus increment (μm)                               | 0.3                       | 0.2                       |
| Pixel size (Å)                                       | 0.82                      | 1.08                      |
| Symmetry imposed                                     | I2                        | I2                        |
| Initial particle images (no.)                        | 229 504                   | 763613                    |
| Final particle images (no.)                          | 15 150                    | 119 210                   |
| Map resolution (Å)                                   | 3.5                       | 3.3                       |
| FSC threshold                                        | 0.143                     | 0.143                     |
| Map resolution range (Å)                             | 3.2 – 999                 | 3.0 – 999                 |
| <b>Refinement</b>                                    |                           |                           |
| Map sharpening B factor (Å <sup>2</sup> )            | -5                        | -5 / variable (see text)  |

|                    |     |       |
|--------------------|-----|-------|
| Model composition  |     |       |
| Non-hydrogen atoms | n/a | 13194 |
| Protein residues   | n/a | 1703  |
| Ligands            | n/a | 9     |
| R.m.s deviations   |     |       |
| Bond lengths (Å)   | n/a | 0.29  |
| Bond angles (°)    | n/a | 0.54  |
| Validation         |     |       |
| MolProbity score   | n/a | 1.28  |
| Clashscore         | n/a | 4     |
| Ramachandran plot  |     |       |
| Favored (%)        | n/a | 98    |
| Allowed (%)        | n/a | 2     |
| Disallowed (%)     | n/a | 0     |
