# Supplementary figures and images for: Molecular Organisation of Tick-Borne Encephalitis Virus
Source: MDPI journal article supplement (doi:10.3390/v14040792), 2022-04-11

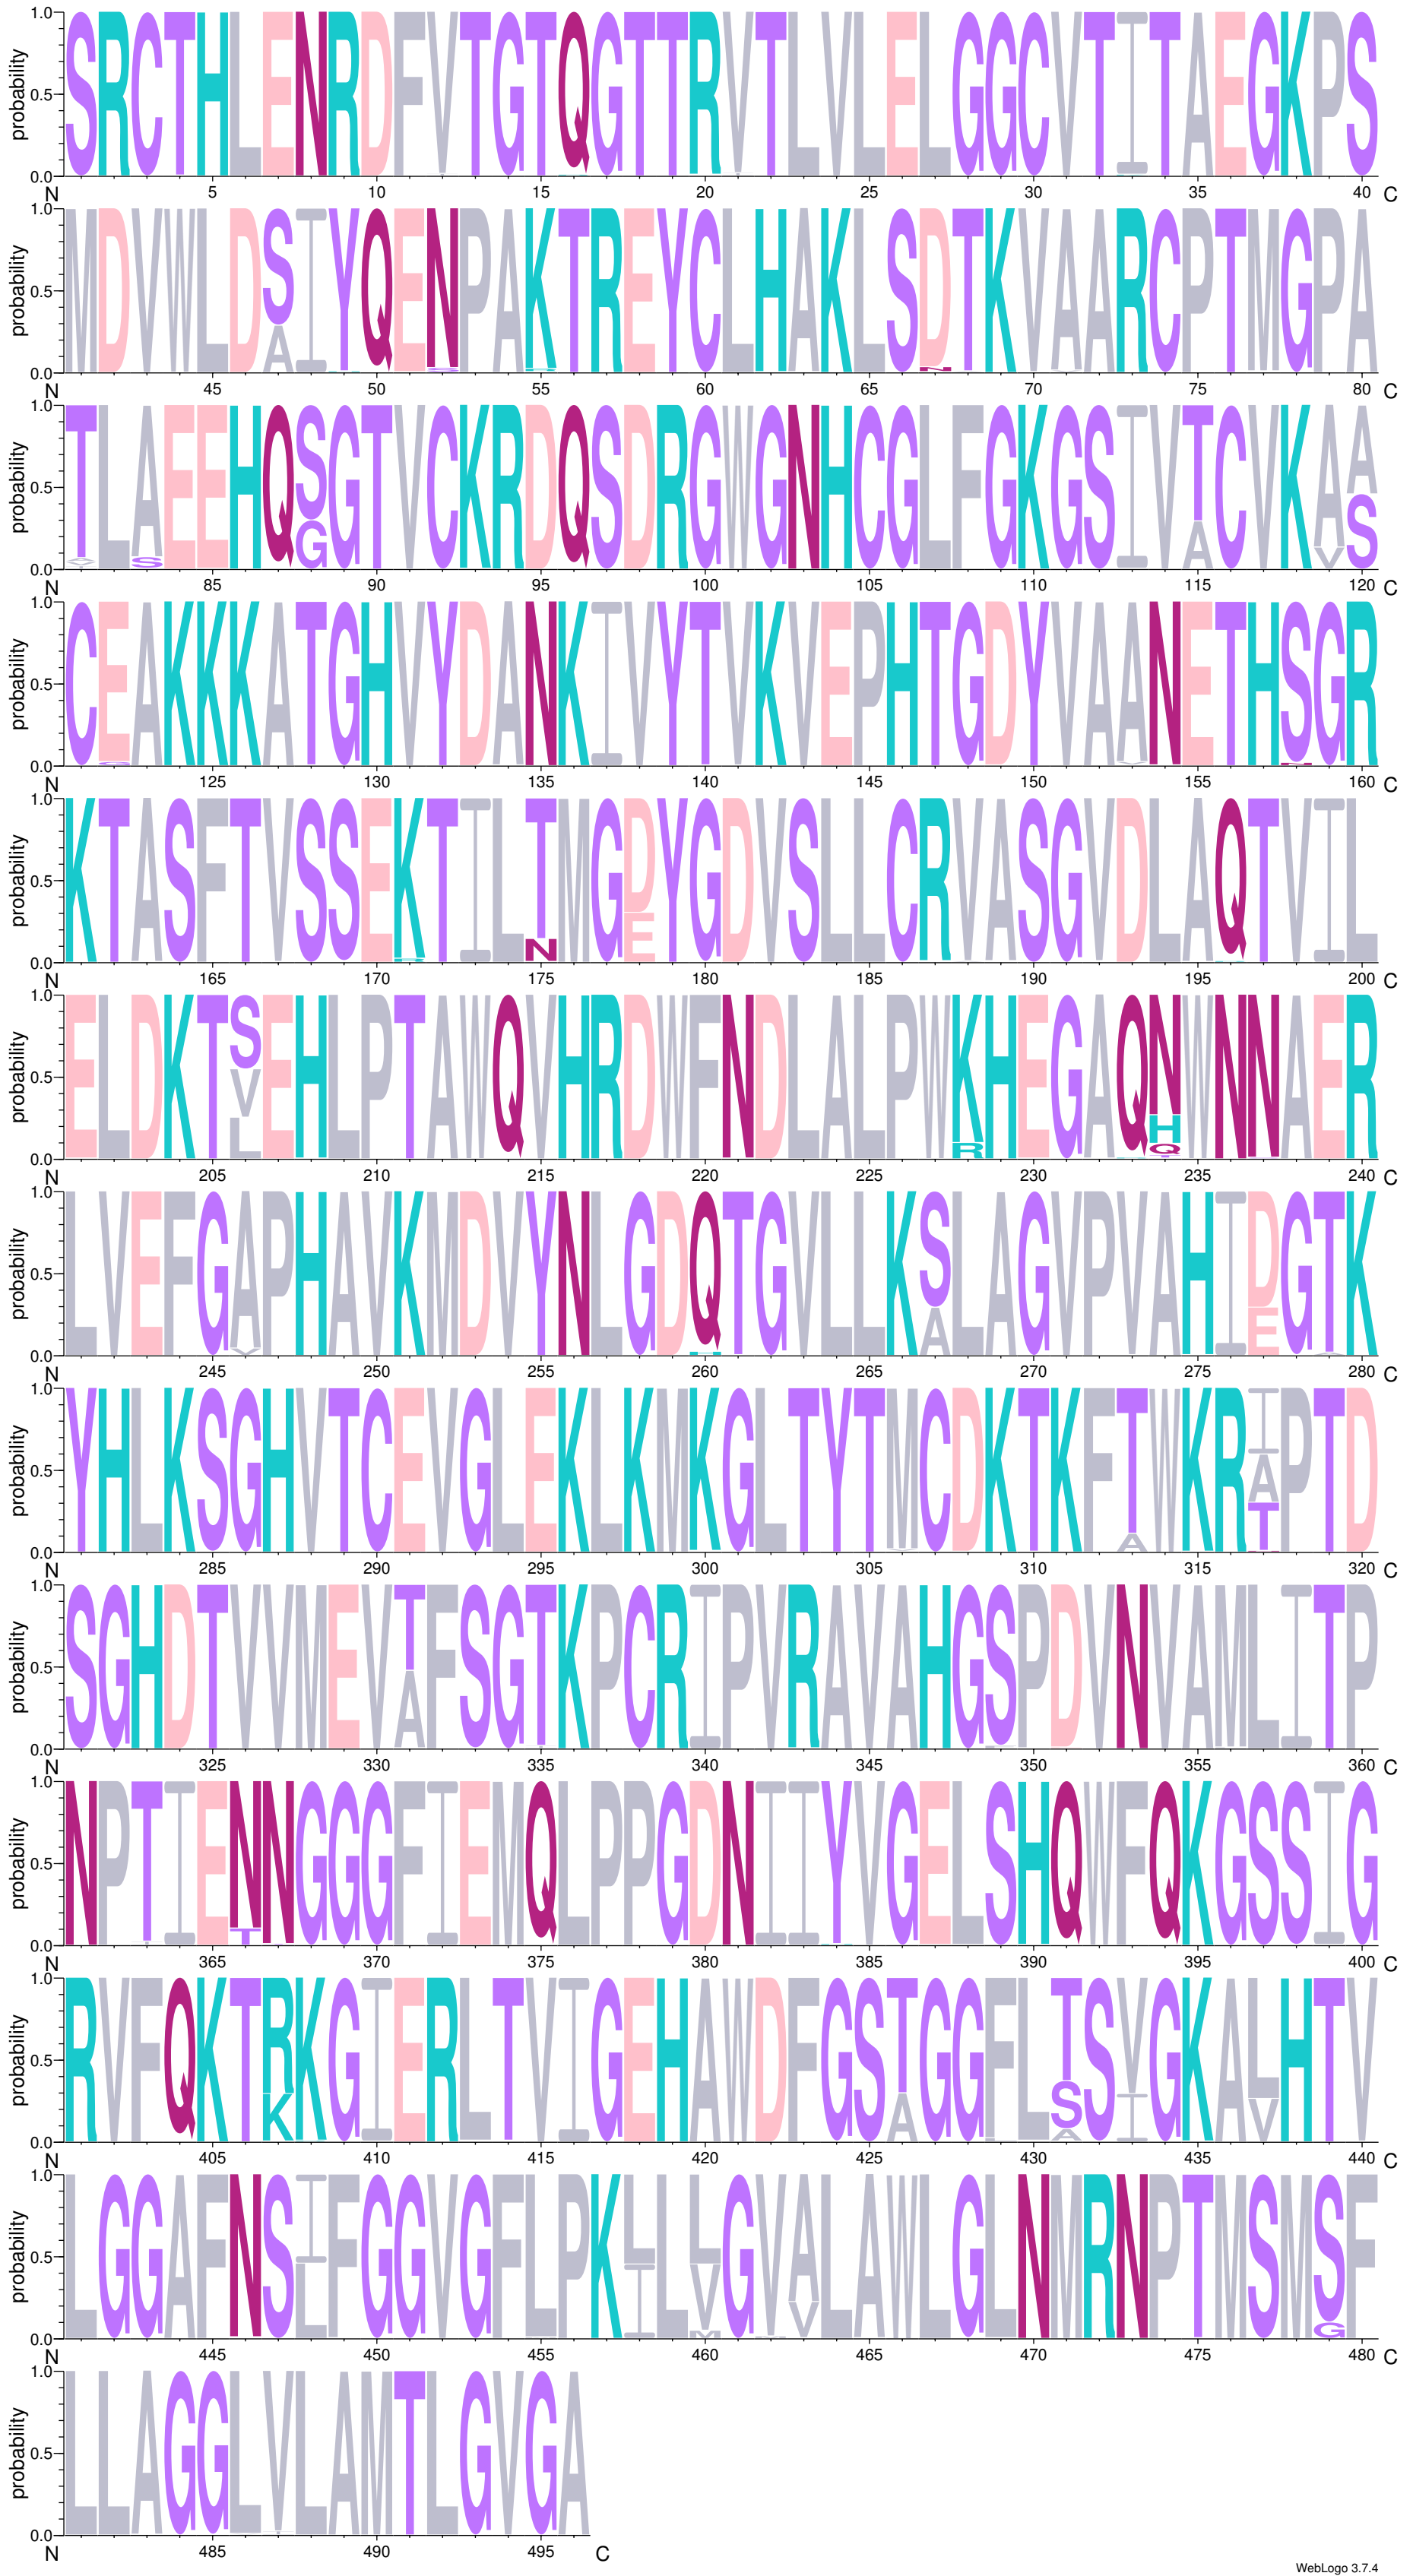

Supplement: s1 [file s1]
